# Supplementary material for: Metal-cation-induced shifts in thiolate redox and reduced sulfur speciation
Source: Royal Society of Chemistry journal article supplement (doi:10.1039/d4sc01025f), 2024-01-01
Supplement: d4sc01025f1.pdf [file d4sc01025f1.pdf]

## Supporting Information

### Metal-Cation-Induced Shifts in Thiolate Redox and Reduced Sulfur Speciation

W. T. Michael Seo, Madeline N. Riffel, Allen G. Oliver, and Emily Y. Tsui\*

Department of Chemistry and Biochemistry, University of Notre Dame, Notre Dame, Indiana  
46556, United States

Email: [etsui@nd.edu](mailto:etsui@nd.edu)

#### Table of Contents

|                               |     |
|-------------------------------|-----|
| General Considerations        | S2  |
| Synthetic Procedures          | S2  |
| NMR Spectra                   | S4  |
| ESI Mass Spectra              | S30 |
| Electronic Absorption Spectra | S35 |
| Cyclic Voltammograms          | S41 |
| Powder X-ray Diffraction      | S45 |
| Crystallographic Details      | S47 |
| Computational Details         | S49 |
| References                    | S63 |

**General Considerations.** Unless indicated otherwise, reactions were carried out in oven-dried glassware in a MBraun glovebox under an atmosphere of purified nitrogen. Anhydrous CH<sub>3</sub>CN was dried using the Grubbs method on a J.C. Meyer solvent system.<sup>1</sup> CD<sub>3</sub>CN was dried over CaH<sub>2</sub> and vacuum transferred before use. DMSO-*d*<sub>6</sub> was distilled three times from molecular sieves. Celite was dried under vacuum at 300 °C for 3 days. <sup>1</sup>H, <sup>13</sup>C, and <sup>19</sup>F NMR spectra were recorded on a Bruker 400 MHz instrument, a Bruker 500 MHz instrument, or a Varian 600 MHz instrument with shifts reported relative to the residual solvent peak (<sup>1</sup>H, δ 1.94 ppm and <sup>13</sup>C, δ 1.32 ppm for CD<sub>3</sub>CN), or to the lock signal for <sup>19</sup>F spectra. <sup>113</sup>Cd NMR were recorded on a Bruker 500 MHz instrument with shifts reported relative to a Cd(ClO<sub>4</sub>)<sub>2</sub> standard in D<sub>2</sub>O (δ 0 ppm). Elemental analysis was performed by Midwest Microlabs, LLC, Indianapolis, IN. Electronic absorption spectra were taken on an Agilent Cary 60 spectrophotometer. Electrospray ionization mass spectroscopy (ESI-MS) was performed at the University of Notre Dame Spectrometry & Proteomics Facility on a Bruker microTOF-Q II instrument. Powder X-ray diffraction (PXRD) data were collected as solid samples or solutions drop-cast on a glass slide using a Bruker AXS D8 Advance diffractometer at a step rate of 0.2° from a 2θ value of 10–80°. Cyclic voltammetry was performed using a Princeton Applied Research VersaSTAT 4 potentiostat. Voltammograms were obtained using a glassy carbon working electrode and platinum wire counter electrode. Potentials were referenced to the ferrocenium/ferrocene (Fc<sup>+</sup>/Fc) couple. Unless otherwise indicated, a scan rate of 0.1 V/s was used.

Unless otherwise indicated, all commercial chemicals were used without further purification. *p*-Toluenethiol was purchased from TCI. 4-Chlorobenzenethiol was purchased from Sigma Aldrich. 4-Fluorobenzenethiol was purchased from Oakwood Chemicals. 4-Trifluorobenzenethiol, lithium triflate, sodium triflate, potassium triflate, magnesium triflate, calcium triflate, and scandium triflate were purchased from Ambeed. Sodium bis(trimethylsilyl)amide was purchased from Acros. Tetrabutylammonium hexafluorophosphate (TBAPF<sub>6</sub>) was recrystallized twice from ethanol and thoroughly dried under high vacuum before use in voltammetry experiments. Cadmium triflate was prepared following literature procedures.<sup>2</sup>

## **Synthetic Procedures**

**Representative synthesis of tetraethylammonium benzenethiolate salts [Et<sub>4</sub>N][4-R-C<sub>6</sub>H<sub>4</sub>S] ([1<sup>R</sup>], R = Me, Cl, F, CF<sub>3</sub>).** In the glovebox, a Schlenk flask equipped with stir bar was charged with a solution of sodium bis(trimethylsilyl)amide (0.183 g, 1.00 mmol) in THF (5 mL). A solution of 4-substituted benzenethiol (1.00 mmol, 1 equiv) in THF (5 mL) was added via syringe while stirring. The reaction was concentrated in vacuo and the resulting residue washed with Et<sub>2</sub>O (2 × 5 mL). The solid was dissolved in CH<sub>3</sub>CN (10 mL), Et<sub>4</sub>NCl added (0.166 g, 1.00 mmol, 1 equiv), and the reaction mixture stirred at RT for 1 h. The mixture was filtered through Celite, concentrated in vacuo, and extracted with THF (10 mL). The solution was concentrated in vacuo to yield the desired product as a colorless, crystalline solid.

**[Et<sub>4</sub>N][1<sup>Me</sup>].** Yield: 87%. <sup>1</sup>H NMR (600 MHz, CD<sub>3</sub>CN) δ 7.03 (d, *J* = 8.0 Hz, 2H), 6.55 (d, *J* = 8.0 Hz, 2H), 3.16 (q, *J* = 7.2 Hz, 8H), 2.10 (s, 3H), 1.20 (t, *J* = 7.2 Hz, 12H).

[Et<sub>4</sub>N][1<sup>F</sup>]. Yield: 65%. <sup>1</sup>H NMR (600 MHz, CD<sub>3</sub>CN) δ 7.32 – 7.17 (m, 2H), 7.01 – 6.80 (m, 2H), 3.17 (q, *J* = 7.3 Hz, 8H), 1.20 (t, *J* = 7.3 Hz, 12H). <sup>19</sup>F NMR (471 MHz, CD<sub>3</sub>CN) δ -135.03 ppm.

[Et<sub>4</sub>N][1<sup>Cl</sup>]. Yield: 96%. <sup>1</sup>H NMR (600 MHz, CD<sub>3</sub>CN) δ 7.10 (d, *J* = 8.5 Hz, 2H), 6.66 (d, *J* = 8.5 Hz, 2H), 3.16 (q, *J* = 7.3 Hz, 8H), 1.20 (t, *J* = 7.3 Hz, 12H).

[Et<sub>4</sub>N][1<sup>CF<sub>3</sub></sup>]. Yield: 49%. <sup>1</sup>H NMR (600 MHz, CD<sub>3</sub>CN) δ 7.15 – 6.95 (m, 2H), 6.56 – 6.35 (m, 2H), 3.16 (q, *J* = 7.3 Hz, 6H), 1.20 (t, *J* = 7.3 Hz, 12H). <sup>19</sup>F NMR (471 MHz, CD<sub>3</sub>CN) δ -64.17 ppm.

**Representative synthesis of tetraethylammonium tetrabenzenethiolatozincate salts ([Et<sub>4</sub>N]<sub>2</sub>[4<sup>R</sup>], R = Me, Cl, F, CF<sub>3</sub>).** Syntheses were adapted from literature procedure.<sup>3</sup> Under ambient conditions, a 20 mL scintillation vial equipped with a stir bar was charged with a solution of 4-substituted thiophenol (0.041 mol, 6.9 equiv), tetraethylammonium chloride (2.25 g, 0.014 mol, 2.3 equiv), and zinc nitrate hexahydrate (1.79 g, 0.006 mol, 1 equiv) in 10 mL methanol. Triethylamine (5.8 mL, 0.041 mol, 6.9 equiv) was added dropwise and the mixture was allowed to stir for 5 min. The reaction mixture was then stored at -30°C overnight. The resulting solid was filtered and recrystallized from hot CH<sub>3</sub>CN, filtered, washed with Et<sub>2</sub>O, and dried in vacuo to give the desired product.

[Et<sub>4</sub>N]<sub>2</sub>[4<sup>Me</sup>]. Yield: 52%. <sup>1</sup>H NMR (600 MHz, CD<sub>3</sub>CN) δ 7.39 (d, *J* = 7.8 Hz, 8H), 6.65 (d, *J* = 7.7 Hz, 8H), 3.12 (q, *J* = 7.3 Hz, 16H), 2.14 (s, 1H), 1.17 (t, *J* = 7.3 Hz, 24H) ppm. <sup>13</sup>C NMR (126 MHz, CD<sub>3</sub>CN) δ 133.77, 129.43, 128.47, 118.30, 53.18 – 52.95 (m), 20.83, 7.76 ppm. Anal. Calcd. for C<sub>44</sub>H<sub>68</sub>N<sub>2</sub>S<sub>4</sub>Zn: C, 64.55; H, 8.37; N, 3.42. Found: C, 64.83; H, 8.43; N, 3.44.

[Et<sub>4</sub>N]<sub>2</sub>[4<sup>Cl</sup>]. Yield: 84%. <sup>1</sup>H NMR (600 MHz, CD<sub>3</sub>CN) δ 7.44 (d, *J* = 8.3 Hz, 8H), 6.80 (d, *J* = 8.3 Hz, 8H), 3.15 (q, *J* = 7.3 Hz, 16H), 1.31 – 1.14 (t, *J* = 7.3 Hz, 24H). <sup>13</sup>C NMR (126 MHz, CD<sub>3</sub>CN) δ 135.19, 127.41, 125.85, 118.30, 62.68 – 41.85 (m), 7.71 ppm. Anal. Calcd. for C<sub>40</sub>H<sub>56</sub>Cl<sub>4</sub>N<sub>2</sub>S<sub>4</sub>Zn: C, 53.36; H, 6.27; N, 3.11. Found: C, 53.63; H, 6.38; N, 3.17.

[Et<sub>4</sub>N]<sub>2</sub>[4<sup>F</sup>]. Yield: 51%. <sup>1</sup>H NMR (500 MHz, CD<sub>3</sub>CN) δ 7.44 (d, *J* = 8.7, 8H), 6.59 (t, *J* = 8.7 Hz, 8H), 3.13 (q, *J* = 7.3 Hz, 16H), 1.17 (t, *J* = 7.3 Hz, 24H) ppm. <sup>13</sup>C NMR (126 MHz, CD<sub>3</sub>CN) δ 160.55, 134.69 (d, *J* = 6.8 Hz), 118.30, 114.18 (d, *J* = 20.6 Hz), 65.38 – 37.73 (m), 7.73 ppm. <sup>19</sup>F NMR (471 MHz, CD<sub>3</sub>CN) δ -130.14 ppm. Anal. Calcd. for C<sub>40</sub>H<sub>56</sub>F<sub>4</sub>N<sub>2</sub>S<sub>4</sub>Zn: C, 57.57; H, 6.76; N, 3.36. Found: C, 57.32; H, 6.85; N, 3.91.

[Et<sub>4</sub>N]<sub>2</sub>[1<sup>CF<sub>3</sub></sup>]. Yield: 44%. <sup>1</sup>H NMR (500 MHz, CD<sub>3</sub>CN) δ 7.64 (d, *J* = 7.9 Hz, 8H), 7.09 (d, *J* = 7.9 Hz, 8H), 3.10 (q, *J* = 7.3 Hz, 16H), 1.25 – 1.07 (t, *J* = 7.3 Hz, 24H) ppm. <sup>13</sup>C NMR (126 MHz, CD<sub>3</sub>CN) δ 156.87, 133.75, 124.27 (q, CF<sub>3</sub>, *J* = 3.9 Hz), 118.30, 63.83 – 43.94 (m), 7.71 ppm. <sup>19</sup>F NMR (471 MHz, CD<sub>3</sub>CN): δ 65.0 ppm. Anal. Calcd. for C<sub>44</sub>H<sub>56</sub>F<sub>12</sub>N<sub>2</sub>S<sub>4</sub>Zn: C, 51.08; H, 5.46; N, 2.71. Found: C, 51.05; H, 4.98; N, 2.93.

**Synthesis of tetraethylammonium tetra(*p*-toluenethiolato)cadmium salt ([Et<sub>4</sub>N]<sub>2</sub>[Cd(*p*-tolS)<sub>4</sub>].** Under ambient conditions, a 20 mL scintillation vial equipped with a stir bar was charged with a solution of *p*-toluenethiol (1.24 g, 0.010 mol, 4 equiv), tetraethylammonium chloride (0.825 g, 0.005 mol, 2 equiv), and cadmium nitrate hexahydrate (0.771 g, 0.0025 mol, 1 equiv) in methanol (10 mL). While stirring, a solution of potassium hydroxide (0.561 g, 0.010 mol, 4 equiv)

in methanol (5 mL) was added dropwise and the mixture was allowed to stir at RT for 5 min. The reaction mixture was then stored at  $-30^{\circ}\text{C}$  overnight. The resulting solid was filtered, washed with acetone and  $\text{Et}_2\text{O}$ , and dried in vacuo to give the desired product as pale blue crystals (1.2 g, 65%).  $^1\text{H}$  NMR (400 MHz,  $\text{CD}_3\text{CN}$ )  $\delta$  7.33 (d,  $J = 8.0$  Hz, 8H), 6.65 (d,  $J = 8.0$  Hz, 8H), 3.10 (q,  $J = 7.3$  Hz, 16H), 2.14 (s, 3H), 1.18 – 1.07 (t,  $J = 7.3$  Hz, 24H).  $^{13}\text{C}$  NMR (101 MHz,  $\text{CD}_3\text{CN}$ )  $\delta$  134.00, 128.68, 118.28, 53.09, 20.81, 7.79.  $^{113}\text{Cd}$  NMR (111 MHz,  $\text{DMSO-}d_6$ )  $\delta$  581.08.

### NMR Spectra

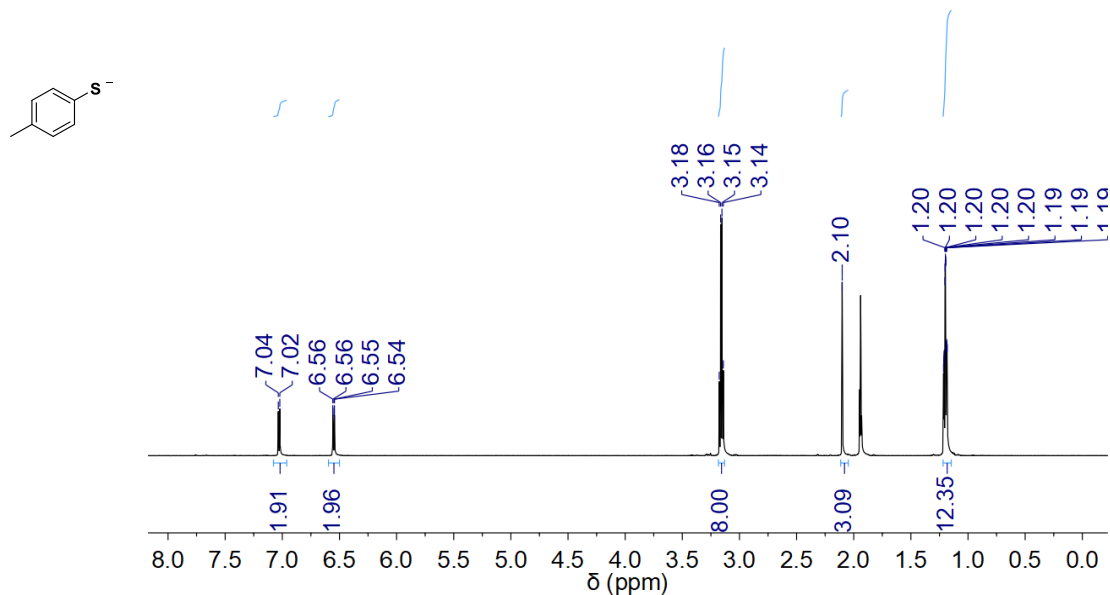

**Figure S1.**  $^1\text{H}$  NMR spectrum of  $[\text{Et}_4\text{N}][\mathbf{1}^{\text{Me}}]$  in  $\text{CD}_3\text{CN}$  at  $20^{\circ}\text{C}$ .

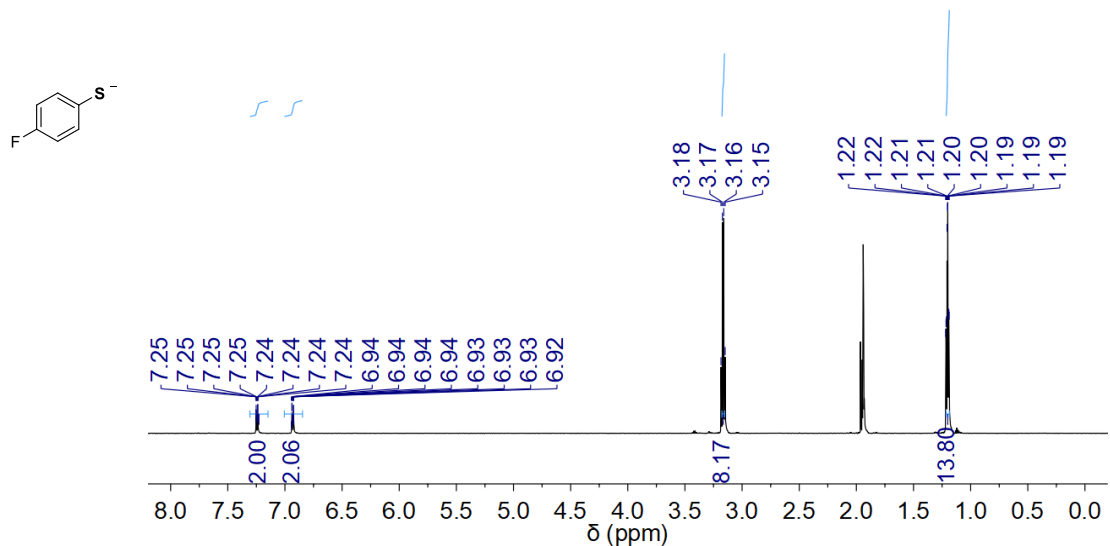

**Figure S2.**  $^1\text{H}$  NMR spectrum of  $[\text{Et}_4\text{N}][\mathbf{1}^{\text{F}}]$  in  $\text{CD}_3\text{CN}$  at  $20^{\circ}\text{C}$ .

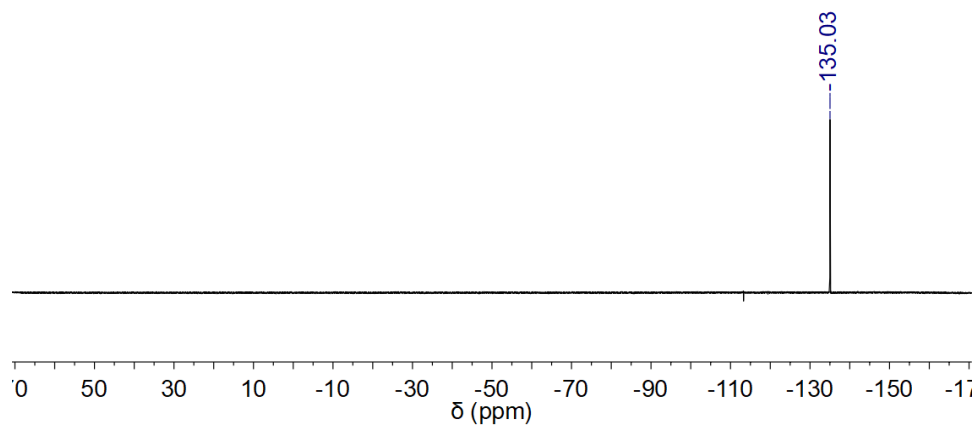

**Figure S3.**  $^{19}\text{F}$  NMR spectrum of  $[\text{Et}_4\text{N}][\mathbf{1}^{\text{F}}]$  in  $\text{CD}_3\text{CN}$  at  $20\text{ }^\circ\text{C}$ .

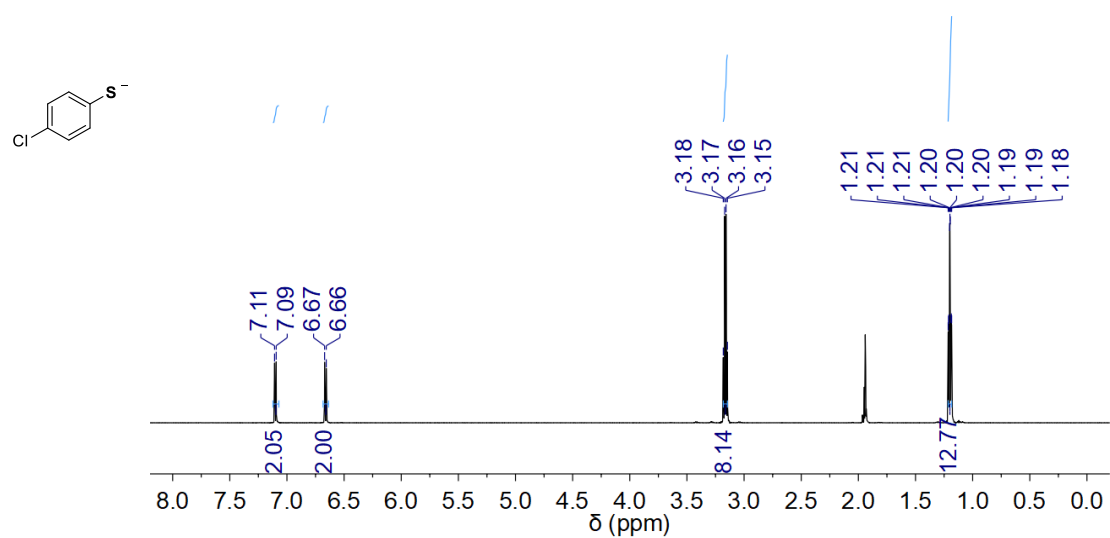

**Figure S4.**  $^1\text{H}$  NMR spectrum of  $[\text{Et}_4\text{N}][\mathbf{1}^{\text{Cl}}]$  in  $\text{CD}_3\text{CN}$  at  $20\text{ }^\circ\text{C}$ .

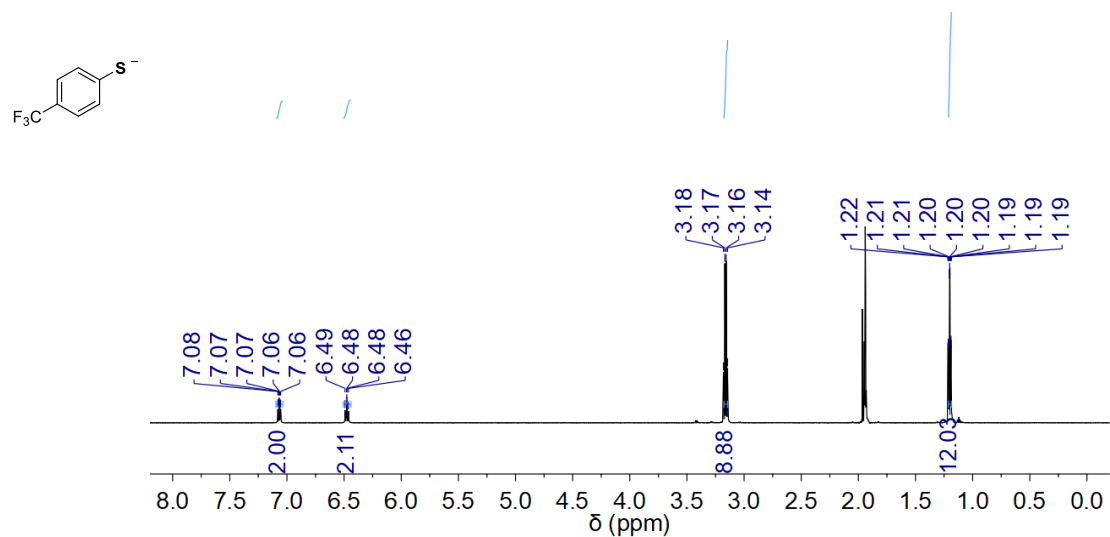

**Figure S5.**  $^1\text{H}$  NMR spectrum of  $[\text{Et}_4\text{N}][\mathbf{1}^{\text{CF}_3}]$  in  $\text{CD}_3\text{CN}$  at  $20\text{ }^\circ\text{C}$ .

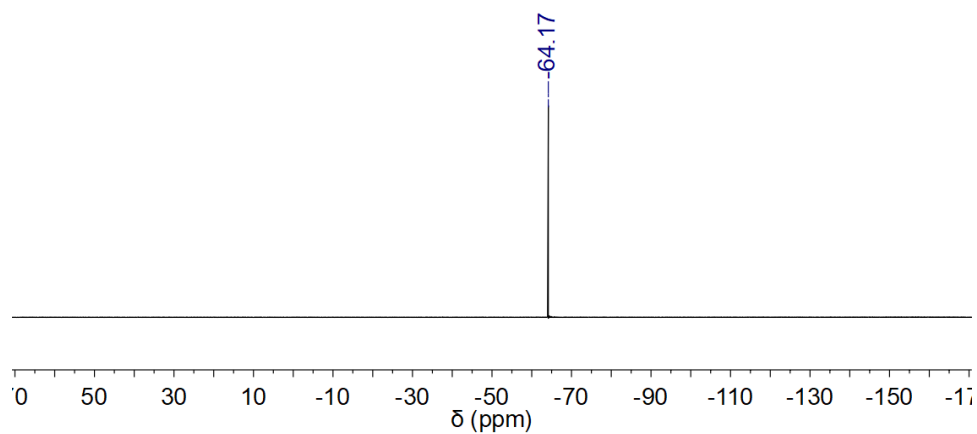

**Figure S6.**  $^{19}\text{F}$  NMR spectrum of  $[\text{Et}_4\text{N}][\mathbf{1}^{\text{CF}_3}]$  in  $\text{CD}_3\text{CN}$  at  $20\text{ }^\circ\text{C}$ .

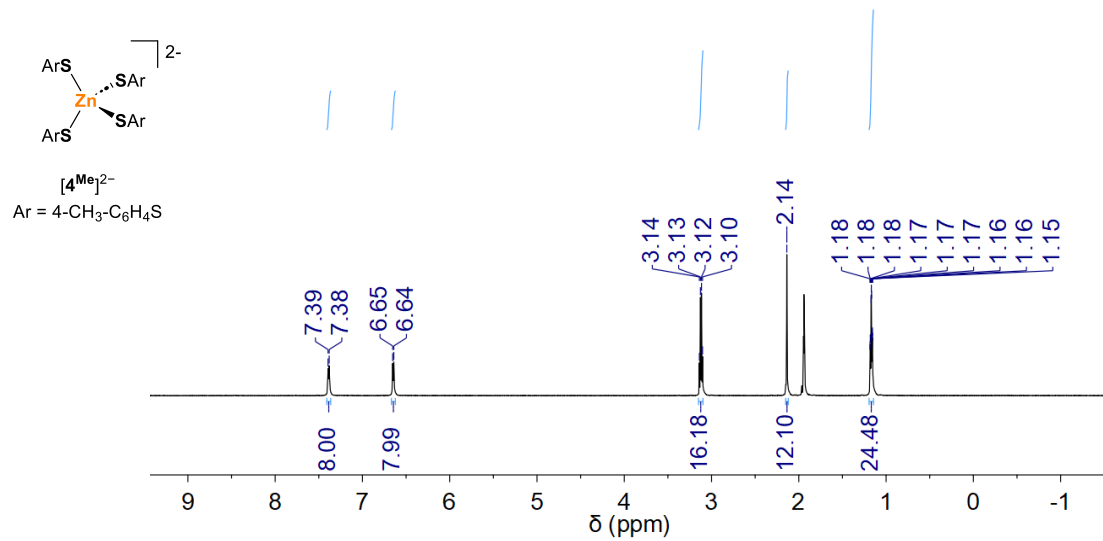

**Figure S7.** <sup>1</sup>H NMR spectrum of [Et<sub>4</sub>N]<sub>2</sub>[4<sup>Me</sup>] in CD<sub>3</sub>CN at 20 °C.

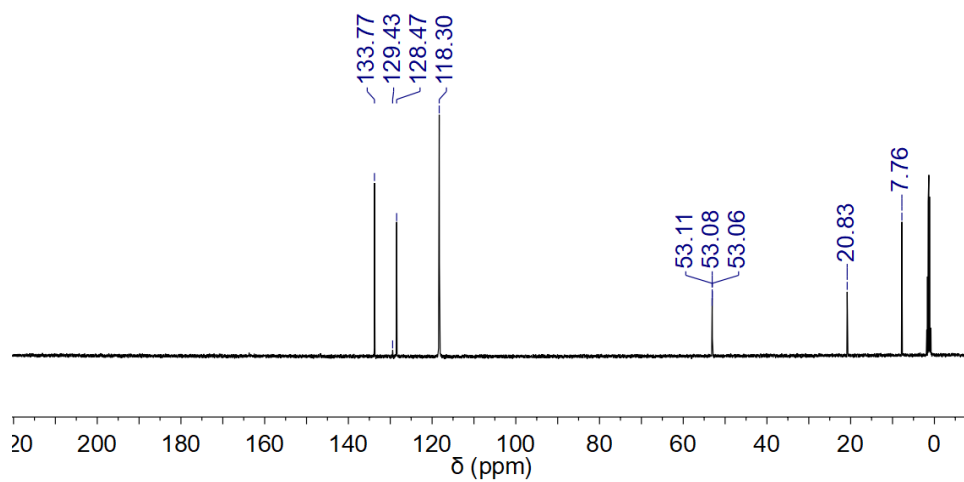

**Figure S8.** <sup>13</sup>C NMR spectrum of [Et<sub>4</sub>N]<sub>2</sub>[4<sup>Me</sup>] in CD<sub>3</sub>CN at 20 °C.





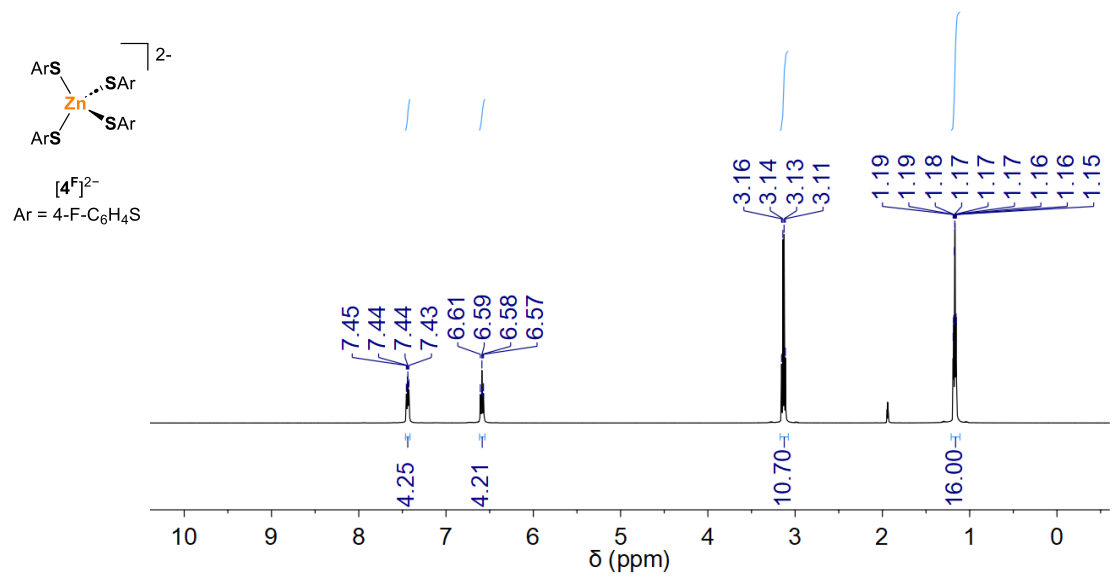

**Figure S11.** <sup>1</sup>H NMR spectrum of [Et<sub>4</sub>N]<sub>2</sub>[4<sup>F</sup>] in CD<sub>3</sub>CN at 20 °C.

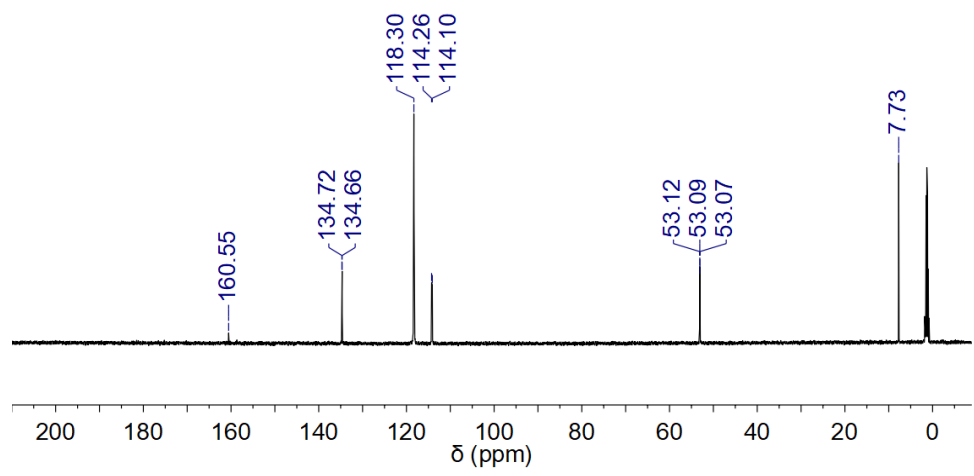

**Figure S12.** <sup>13</sup>C NMR spectrum of [Et<sub>4</sub>N]<sub>2</sub>[4<sup>F</sup>] in CD<sub>3</sub>CN at 20 °C.

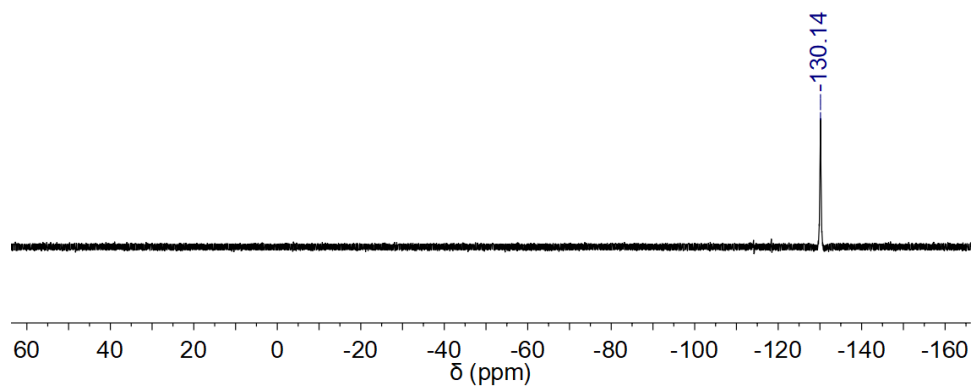

**Figure S13.**  $^{19}\text{F}$  NMR spectrum of  $[\text{Et}_4\text{N}]_2[\mathbf{4}^{\text{F}}]$  in  $\text{CD}_3\text{CN}$  at  $20^\circ\text{C}$ .

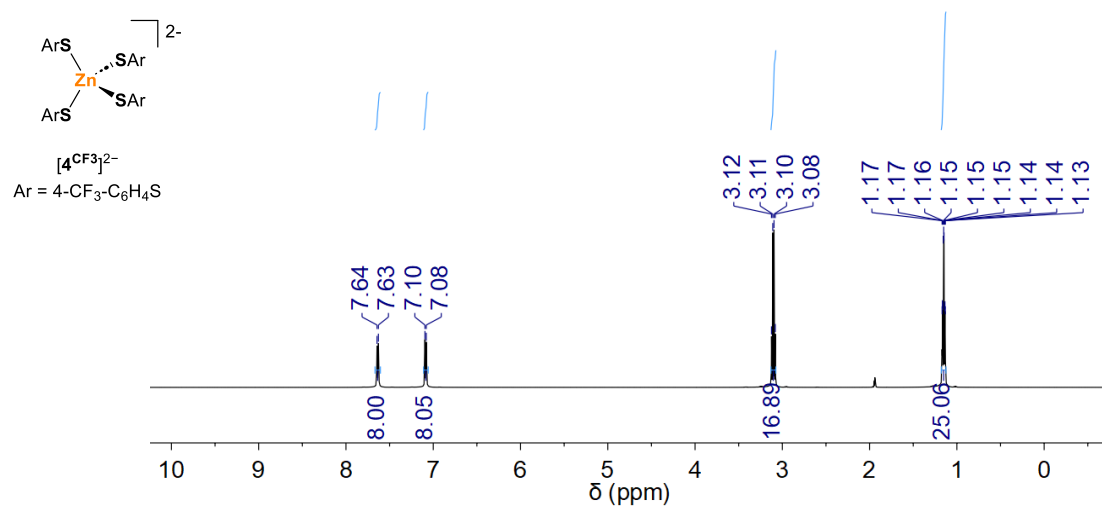

**Figure S14.**  $^1\text{H}$  NMR spectrum of  $[\text{Et}_4\text{N}]_2[\mathbf{4}^{\text{CF}_3}]$  in  $\text{CD}_3\text{CN}$  at  $20^\circ\text{C}$ .

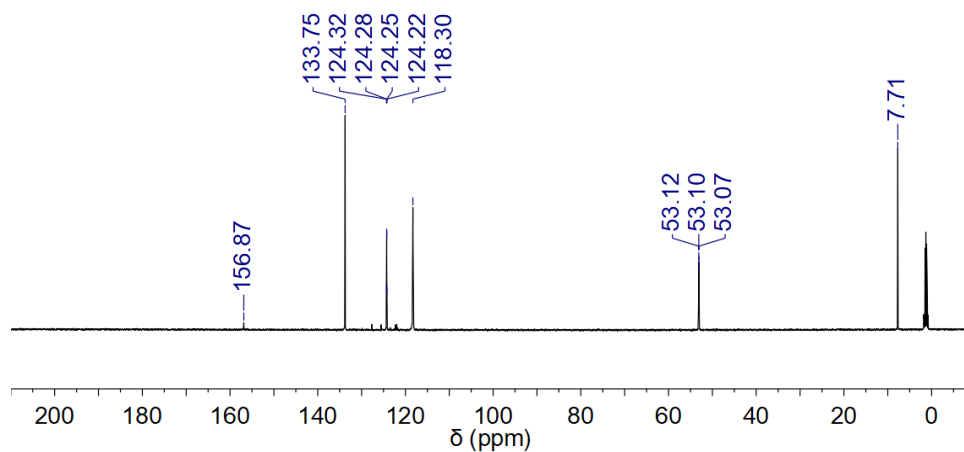

**Figure S15.**  $^{13}\text{C}$  NMR spectrum of  $[\text{Et}_4\text{N}]_2[\mathbf{4}^{\text{CF}_3}]$  in  $\text{CD}_3\text{CN}$  at  $20\text{ }^\circ\text{C}$ .

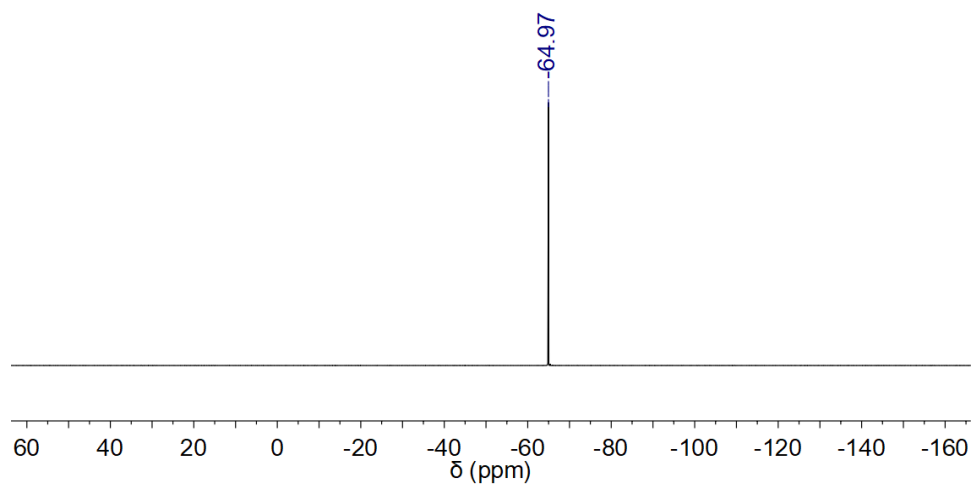

**Figure S16.**  $^{19}\text{F}$  NMR spectrum of  $[\text{Et}_4\text{N}]_2[\mathbf{4}^{\text{CF}_3}]$  in  $\text{CD}_3\text{CN}$  at  $20\text{ }^\circ\text{C}$ .

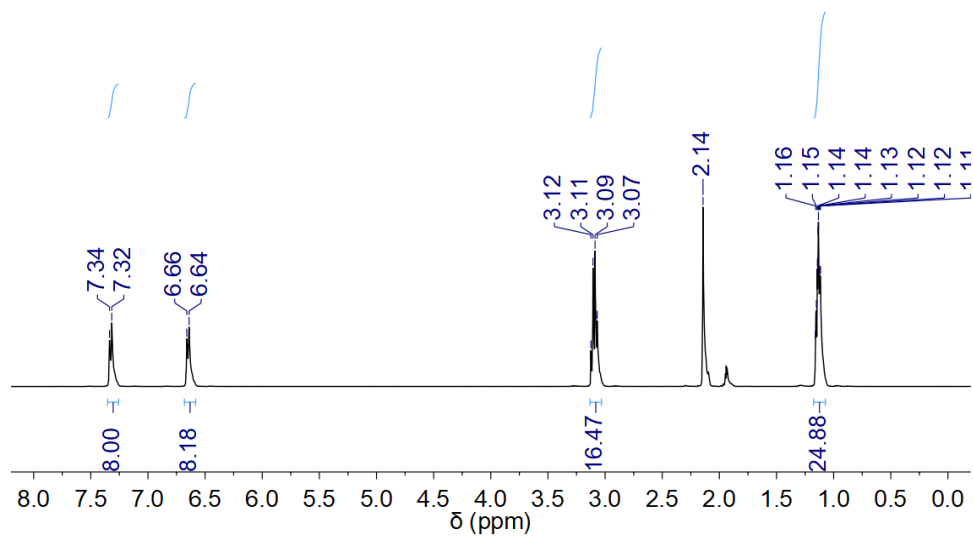

**Figure S17.**  $^1\text{H}$  NMR spectrum of  $[\text{Et}_4\text{N}]_2[\text{Cd}(p\text{-tolS})_4]$  in  $\text{CD}_3\text{CN}$  at  $20^\circ\text{C}$ .

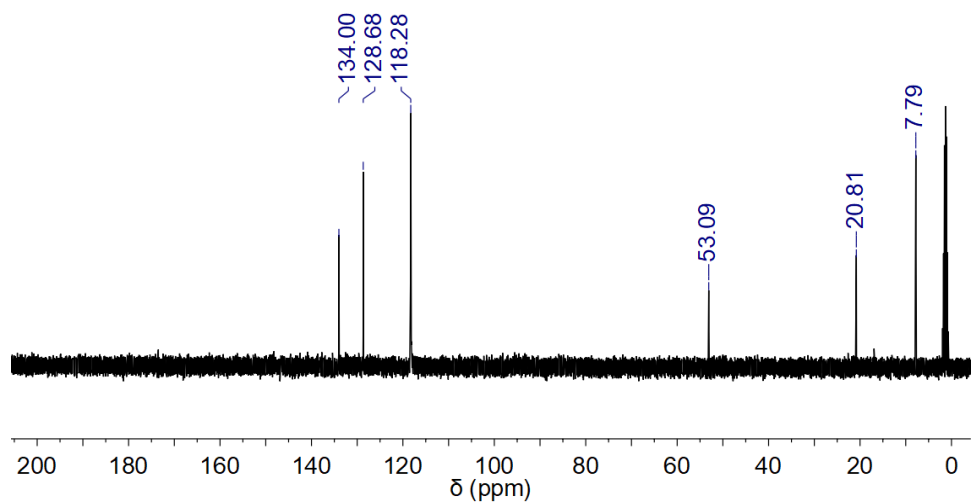

**Figure S18.**  $^{13}\text{C}$  NMR spectrum of  $[\text{Et}_4\text{N}]_2[\text{Cd}(p\text{-tolS})_4]$  in  $\text{CD}_3\text{CN}$  at  $20^\circ\text{C}$ .

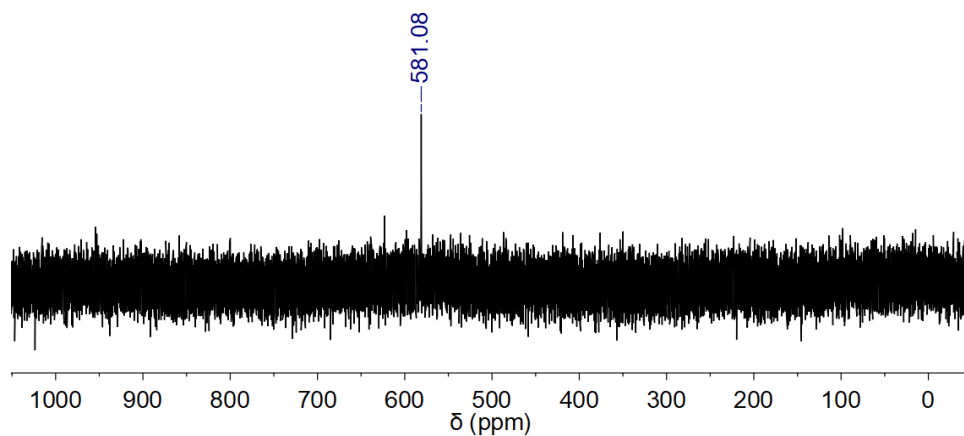

**Figure S19.**  $^{113}\text{Cd}$  NMR spectrum of  $[\text{Et}_4\text{N}]_2[\text{Cd}(p\text{-tolS})_4]$  in  $\text{CD}_3\text{CN}$  at  $20^\circ\text{C}$ .

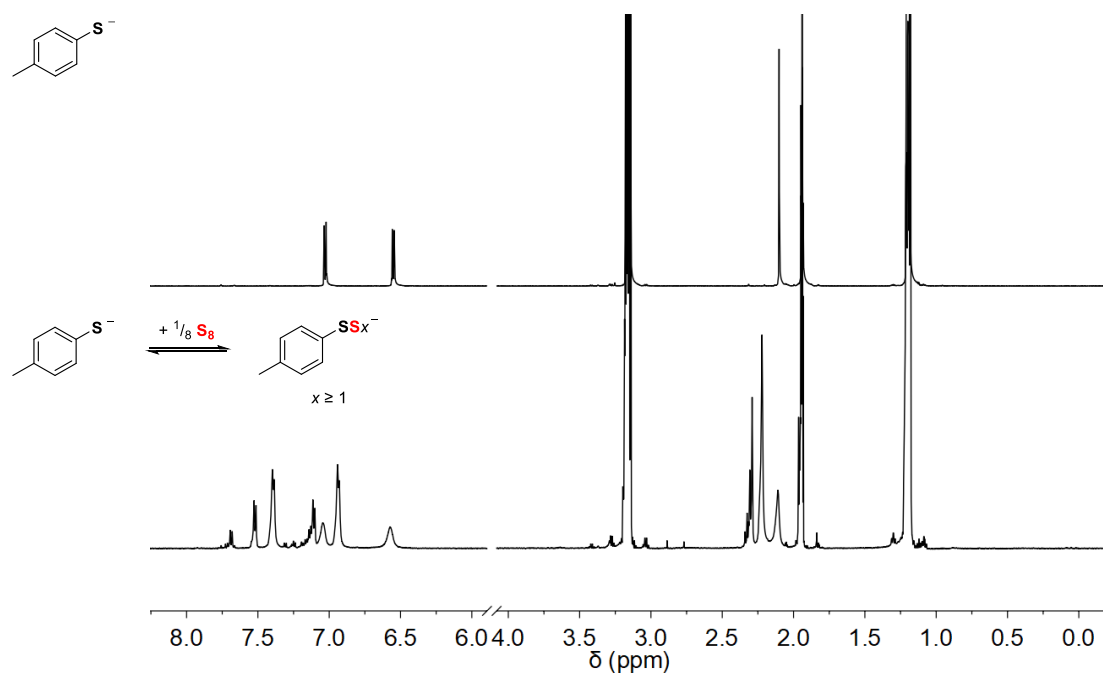

**Figure S20.**  $^1\text{H}$  NMR spectra of  $[\text{Et}_4\text{N}][\mathbf{1}^{\text{Me}}]$  (top) and  $[\text{Et}_4\text{N}][\mathbf{1}^{\text{Me}}]$  treated with  $1/8$  equiv  $\text{S}_8$  (bottom) in  $\text{CD}_3\text{CN}$  at  $20^\circ\text{C}$ .

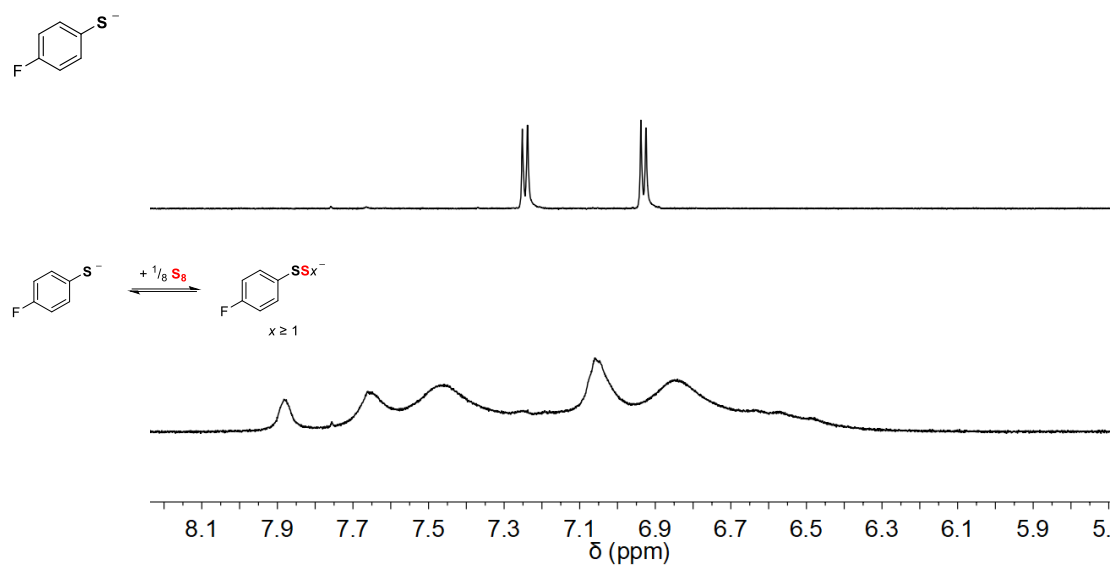

**Figure S21.**  $^1\text{H}$  NMR spectra of  $[\text{Et}_4\text{N}][\mathbf{1}^{\text{F}}]$  (top) and  $[\text{Et}_4\text{N}][\mathbf{1}^{\text{F}}]$  treated with  $1/8$  equiv  $\text{S}_8$  (bottom) in  $\text{CD}_3\text{CN}$  at  $20^\circ\text{C}$ . Only the aromatic region is shown for clarity.

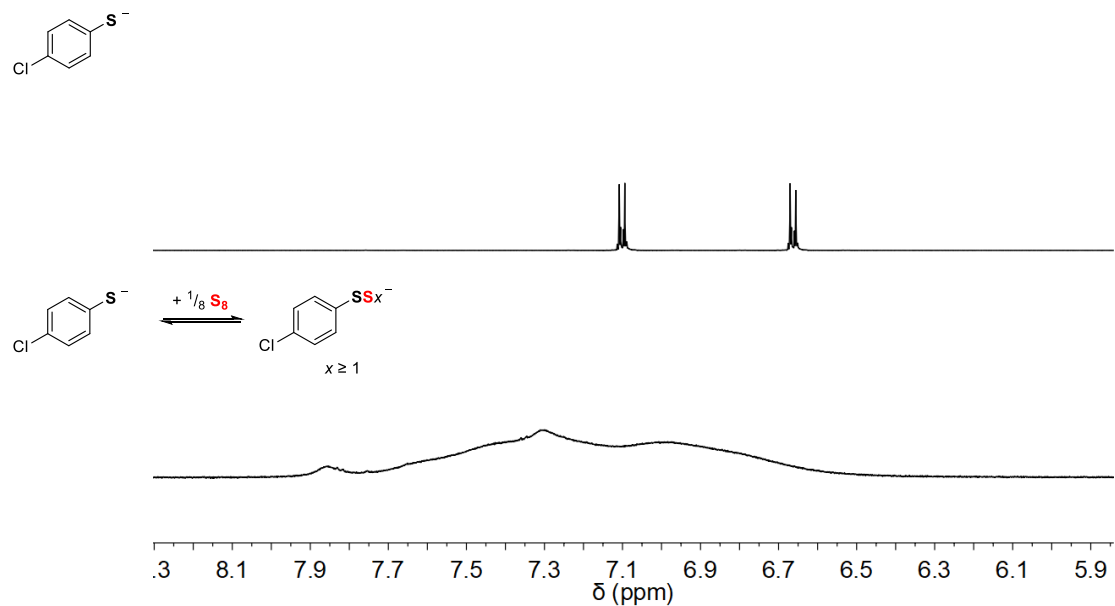

**Figure S22.**  $^1\text{H}$  NMR spectra of  $[\text{Et}_4\text{N}][\mathbf{1}^{\text{Cl}}]$  (top) and  $[\text{Et}_4\text{N}][\mathbf{1}^{\text{Cl}}]$  treated with  $1/8$  equiv  $\text{S}_8$  (bottom) in  $\text{CD}_3\text{CN}$  at  $20^\circ\text{C}$ .

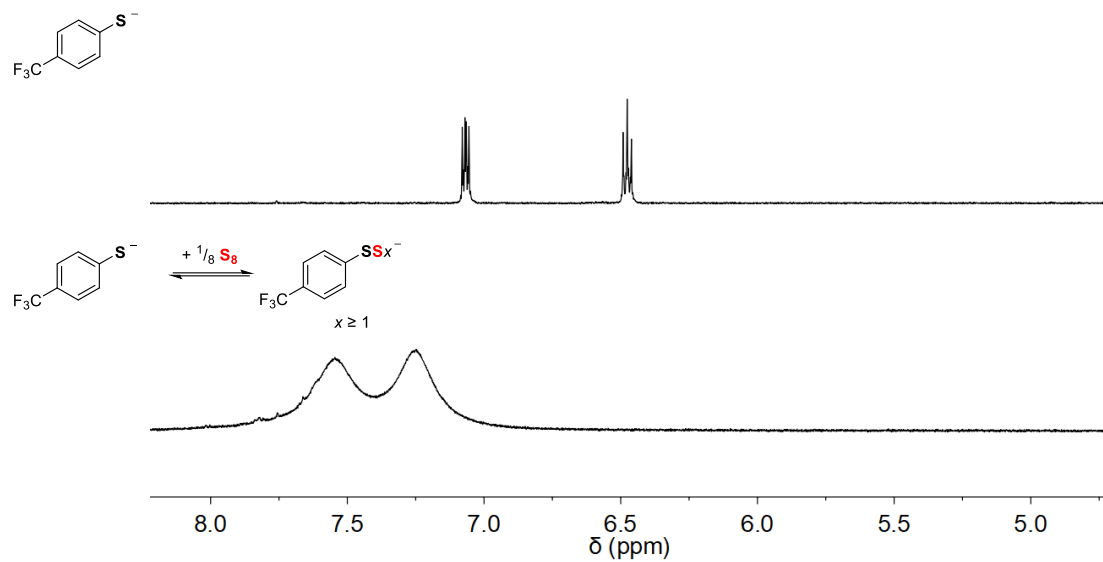

**Figure S23.** <sup>1</sup>H NMR spectra of [Et<sub>4</sub>N][**1**<sup>CF3</sup>] (top) and [Et<sub>4</sub>N][**1**<sup>CF3</sup>] treated with 1/8 equiv S<sub>8</sub> (bottom) in CD<sub>3</sub>CN at 20 °C.

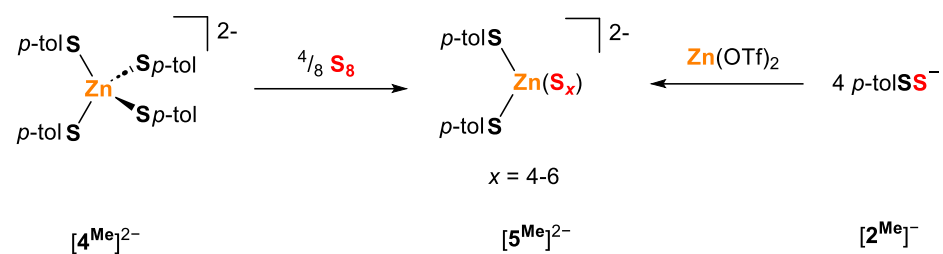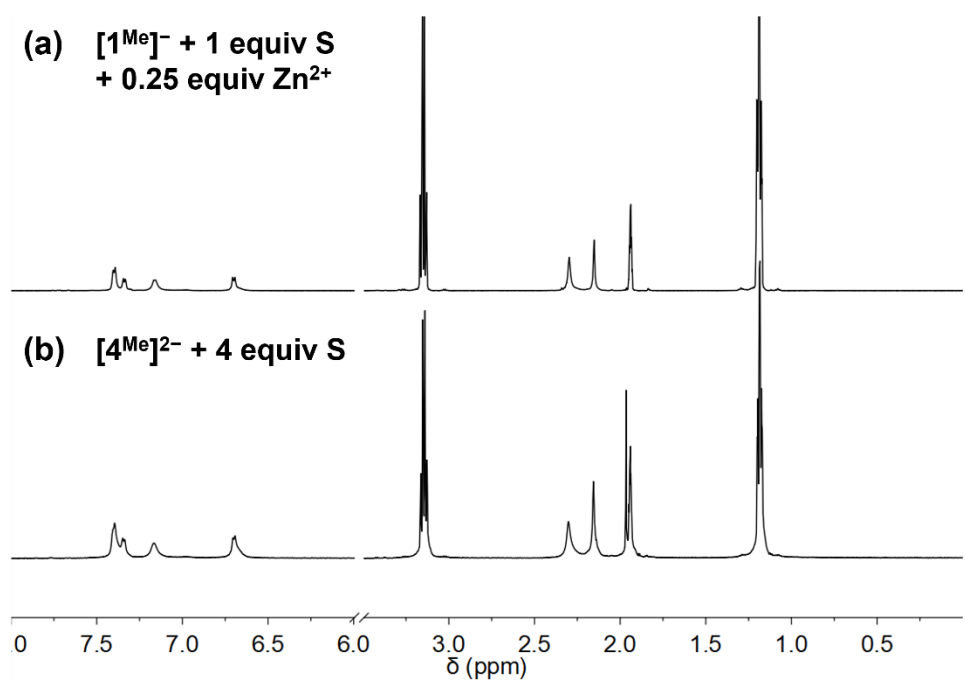

**Figure S24.** <sup>1</sup>H NMR spectra of [Et<sub>4</sub>N]<sub>2</sub>[5<sup>Me</sup>] prepared by (a) treating a mixture of [Et<sub>4</sub>N][1<sup>Me</sup>] and 1/8 equiv S<sub>8</sub> with 0.25 equiv Zn(OTf)<sub>2</sub> or (b) treating [Et<sub>4</sub>N]<sub>2</sub>[4<sup>Me</sup>] with 4/8 equiv S<sub>8</sub> in CD<sub>3</sub>CN at 20 °C.



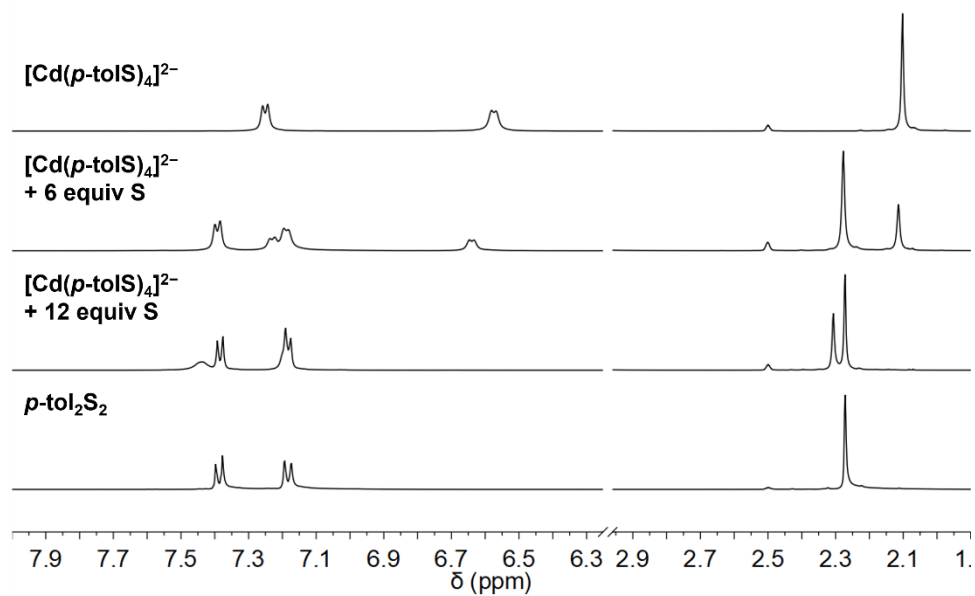

**Figure S25.**  $^1\text{H}$  NMR spectra of  $[\text{Et}_4\text{N}]_2[\text{Cd}(p\text{-tolS})_4]$  treated with increasing equiv  $\text{S}_8$  in  $\text{DMSO-}d_6$  at  $20\text{ }^\circ\text{C}$ .

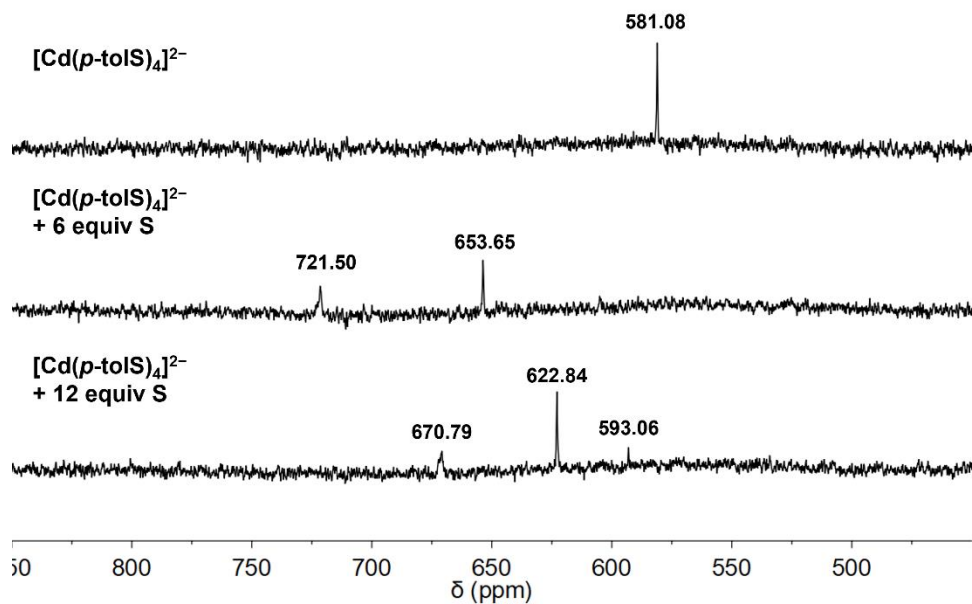

**Figure S26.**  $^{113}\text{Cd}$  NMR spectra of  $[\text{Et}_4\text{N}]_2[\text{Cd}(p\text{-tolS})_4]$  treated with increasing equiv  $\text{S}_8$  in  $\text{DMSO-}d_6$  at  $20\text{ }^\circ\text{C}$ .

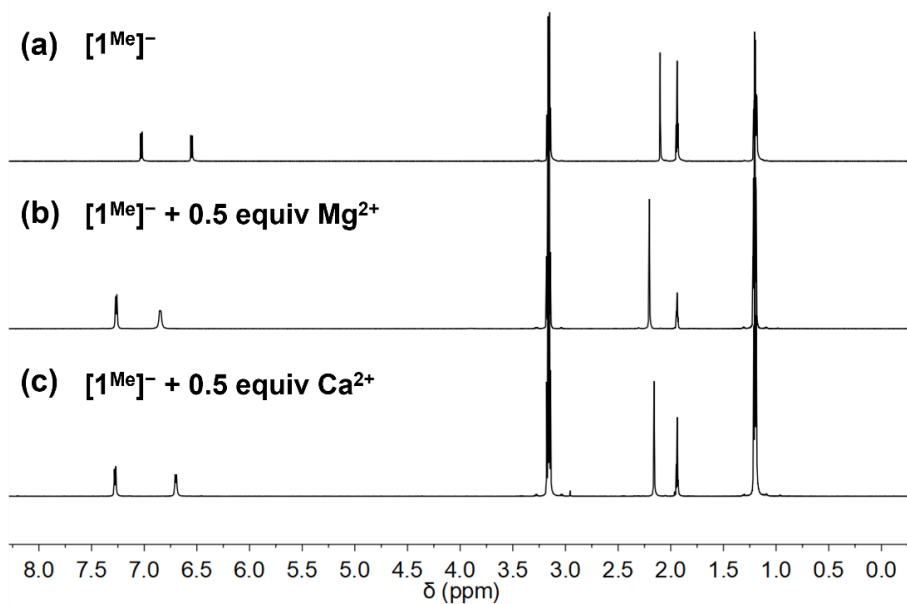

**Figure S27.**  $^1\text{H}$  NMR spectra of (a)  $[\text{Et}_4\text{N}][1\text{Me}]$  treated with (b) 0.5 equiv  $\text{Mg}(\text{ClO}_4)_2$  or (c) 0.5 equiv  $\text{Ca}(\text{OTf})_2$  in  $\text{CD}_3\text{CN}$  at  $20^\circ\text{C}$ .

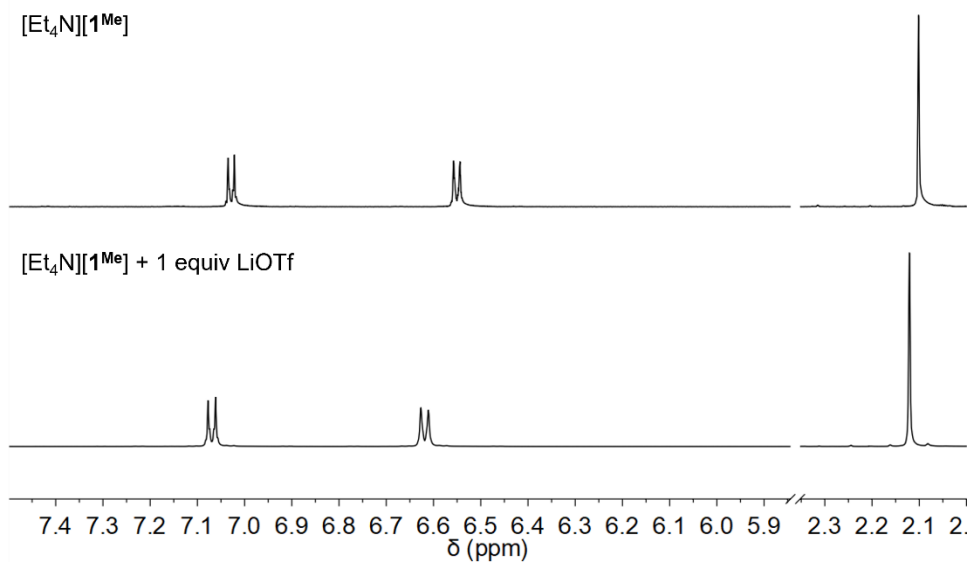

**Figure S28.**  $^1\text{H}$  NMR spectrum of  $[\text{Et}_4\text{N}][1\text{Me}]$  treated with 1 equiv  $\text{LiOTf}$  in  $\text{CD}_3\text{CN}$  at  $20^\circ\text{C}$ .

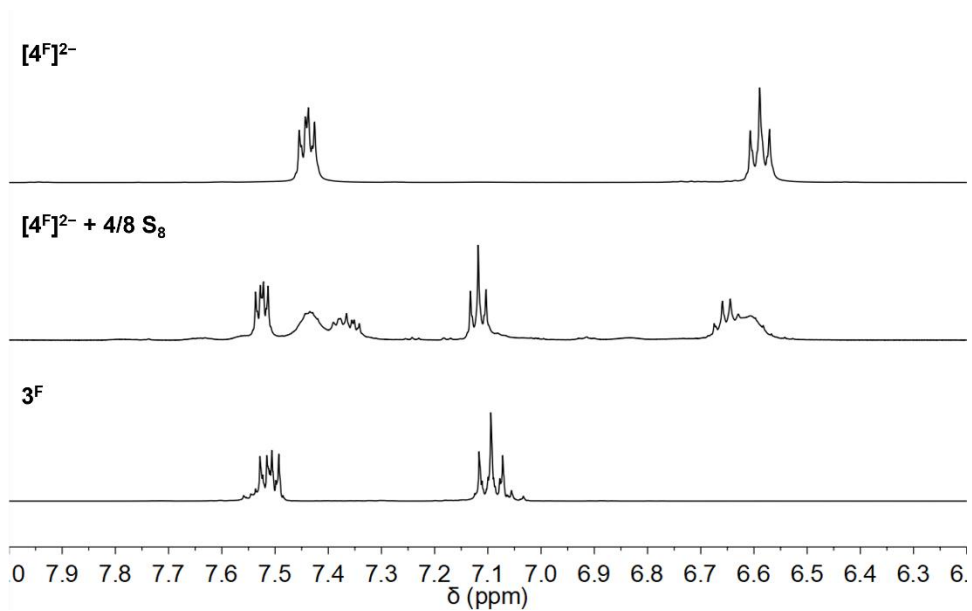

**Figure S29.**  $^1\text{H}$  NMR spectra of  $[\text{Et}_4\text{N}]_2[\mathbf{4}^{\text{F}}]$  treated with  $4/8 \text{ S}_8$  in  $\text{CD}_3\text{CN}$  at  $20\text{ }^\circ\text{C}$ .

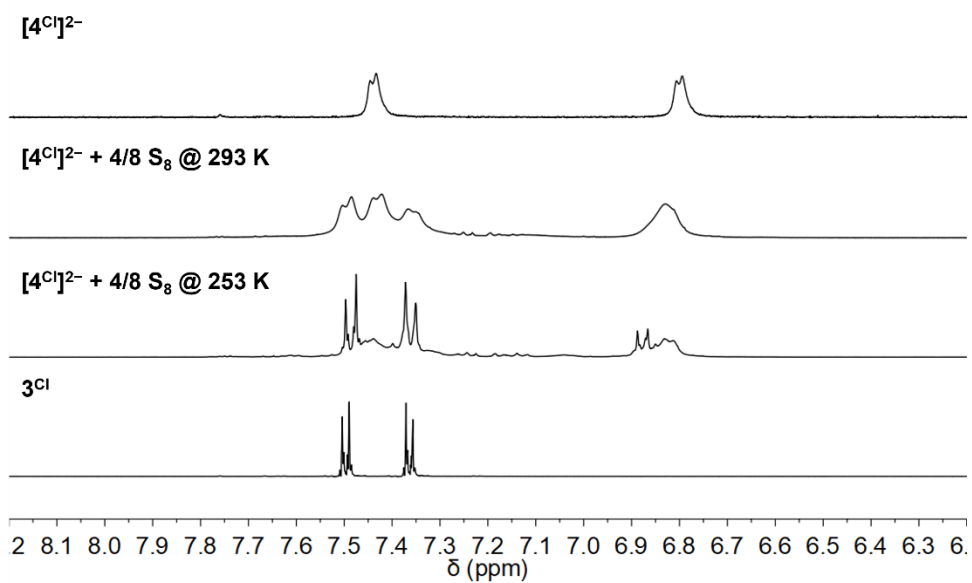

**Figure S30.**  $^1\text{H}$  NMR spectra of  $[\text{Et}_4\text{N}]_2[\mathbf{4}^{\text{Cl}}]$  treated with  $4/8 \text{ S}_8$  in  $\text{CD}_3\text{CN}$  at  $20$  and  $-20\text{ }^\circ\text{C}$ .

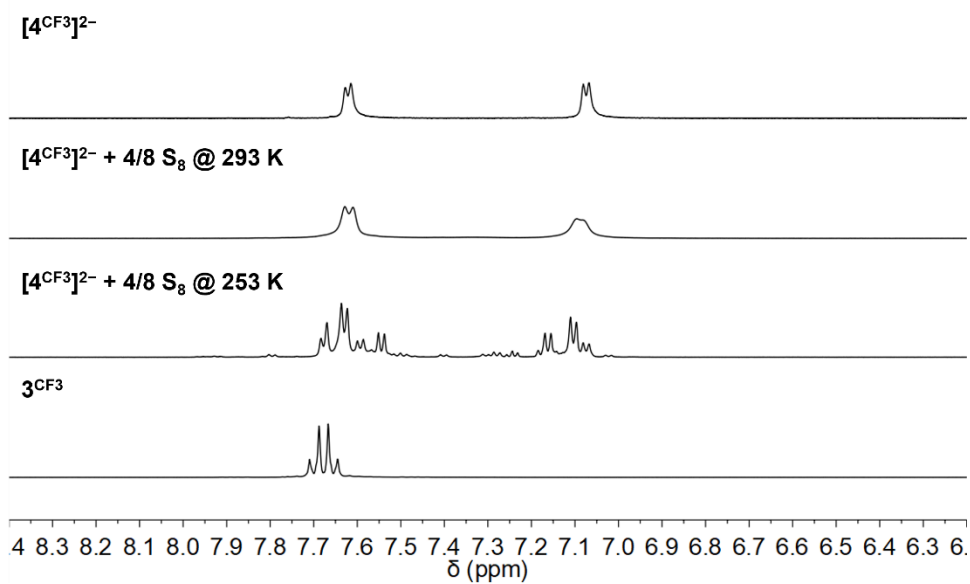

**Figure S31.**  $^1\text{H}$  NMR spectra of  $[\text{Et}_4\text{N}]_2[\text{4CF}_3]$  treated with  $4/8 \text{ S}_8$  in  $\text{CD}_3\text{CN}$  at 20 and  $-20\text{ }^\circ\text{C}$ .

**General methodology for metal triflate salt addition to *p*-tolyl thiolate/polysulfanide mixtures**

To  $\text{CH}_3\text{CN}$  solutions of  $[\text{Et}_4\text{N}][\text{1}^{\text{Me}}]$  (0.010 g in 1.0 mL) was added a saturated  $\text{S}_8$  solution in toluene (0.039 M, 12.6  $\mu\text{L}$ , 1 equiv S). To this mixture was added increasing amounts of metal triflate salt solutions in  $\text{CH}_3\text{CN}$  (up to 1 equiv metal triflate in 1.0 mL), then the reaction mixture was concentrated in vacuo. These residues were redissolved in  $\text{CD}_3\text{CN}$  (0.4 mL) and transferred to NMR tubes for analysis.

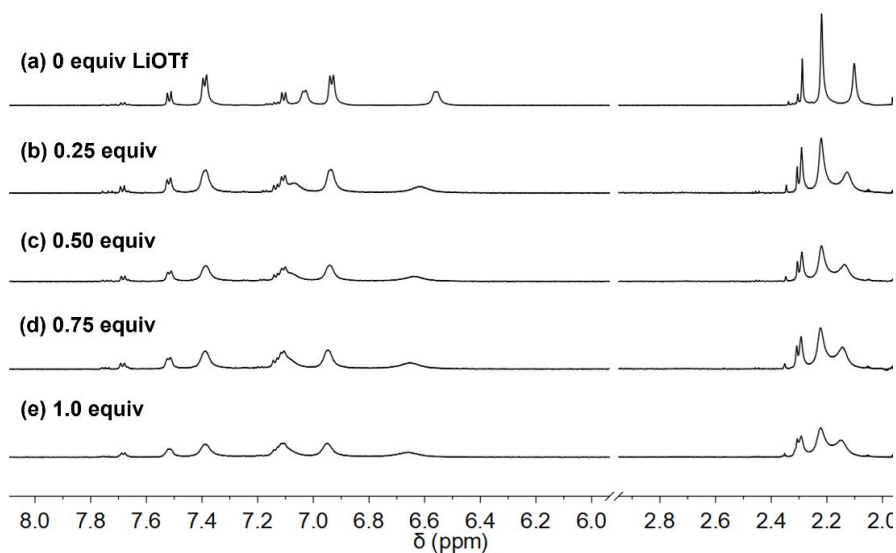

**Figure S32.**  $^1\text{H}$  NMR spectra of a  $\text{CD}_3\text{CN}$  solution of  $[\text{Et}_4\text{N}][\text{1}^{\text{Me}}]$  treated with  $1/8$  equiv  $\text{S}_8$  with (a) no added LiOTf, (b) 0.25 equiv LiOTf, (c) 0.50 equiv LiOTf, (d) 0.75 equiv LiOTf, and (e) 1.0 equiv LiOTf at  $20\text{ }^\circ\text{C}$ .

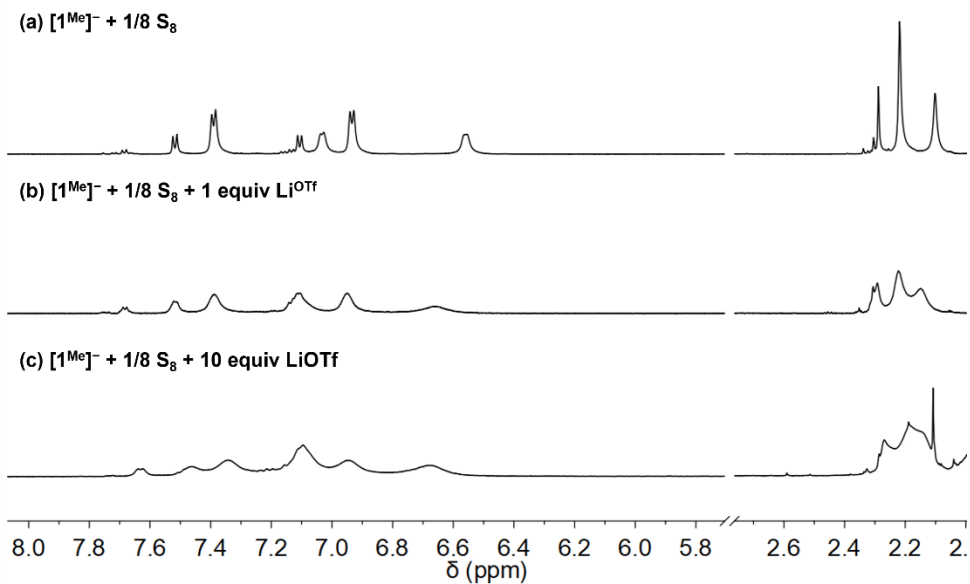

**Figure S33.**  $^1\text{H}$  NMR spectra of (a)  $[\text{Et}_4\text{N}][\mathbf{1}^{\text{Me}}]$  treated with 1/8 equiv  $\text{S}_8$ , (b) the same solution with 1 equiv LiOTf added, and (c) the same solution with 10 equiv LiOTf added in  $\text{CD}_3\text{CN}$  at 20  $^\circ\text{C}$ .

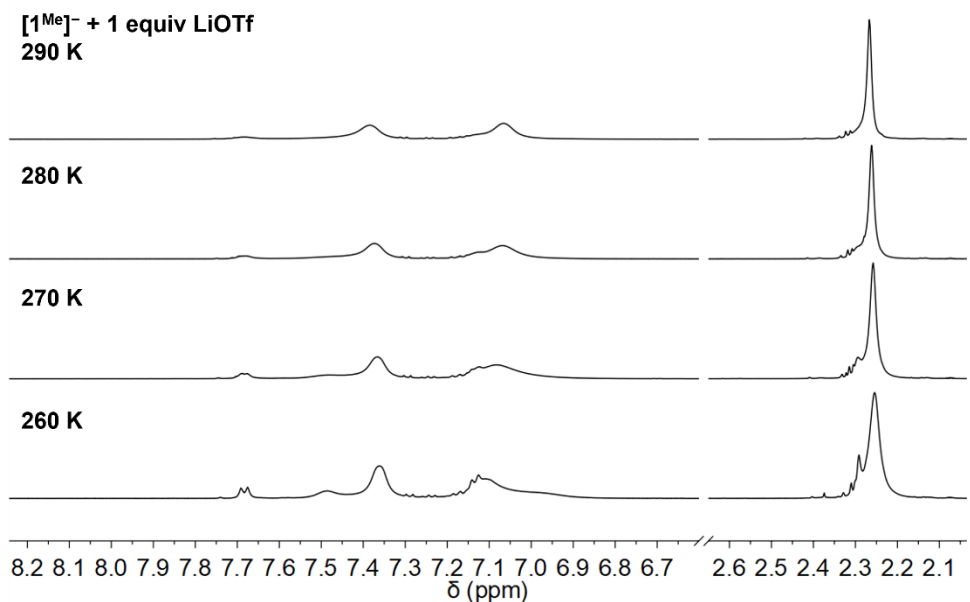

**Figure S34.**  $^1\text{H}$  NMR spectra stack of  $[\text{Et}_4\text{N}][\mathbf{1}^{\text{Me}}]$  treated with 1/8 equiv  $\text{S}_8$  and 1 equiv LiOTf in  $\text{CD}_3\text{CN}$  showing resolution of higher-order polysulfanide peaks upon cooling from 290 K to 260 K.

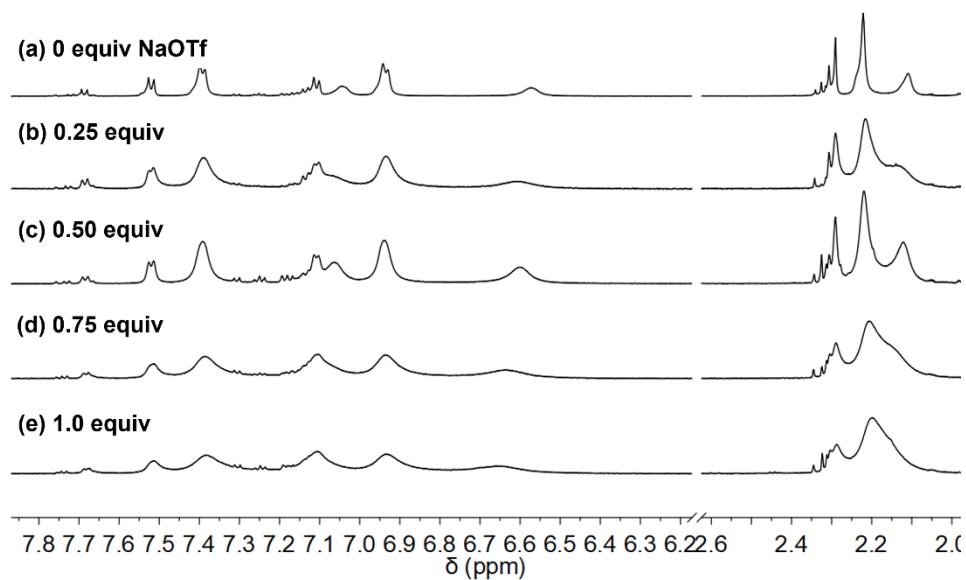

**Figure S35.**  $^1\text{H}$  NMR spectra of (a)  $[\text{Et}_4\text{N}][\mathbf{1}^{\text{Me}}]$  treated with 1/8 equiv  $\text{S}_8$ , (b) the same solution with 0.25 equiv NaOTf, (c) the same solution with 0.50 equiv NaOTf, (d) the same solution with 0.75 equiv NaOTf, and (e) the same solution with 1.0 equiv NaOTf in  $\text{CD}_3\text{CN}$  at 20  $^\circ\text{C}$ .

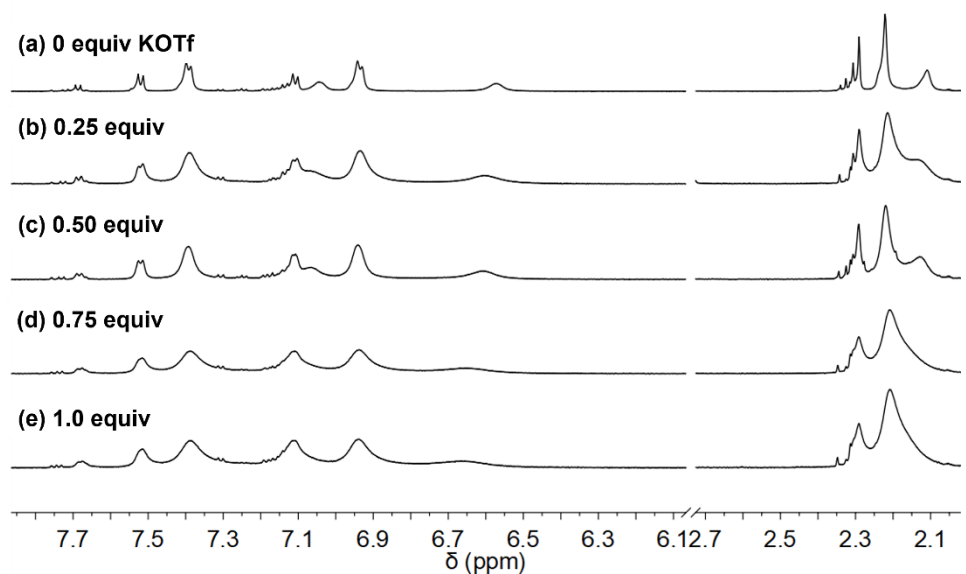

**Figure S36.**  $^1\text{H}$  NMR spectra of (a)  $[\text{Et}_4\text{N}][\mathbf{1}^{\text{Me}}]$  treated with 1/8 equiv  $\text{S}_8$ , (b) the same solution with 0.25 equiv KOTf, (c) the same solution with 0.50 equiv KOTf, (d) the same solution with 0.75 equiv KOTf, and (e) the same solution with 1.0 equiv KOTf in  $\text{CD}_3\text{CN}$  at 20  $^\circ\text{C}$ .

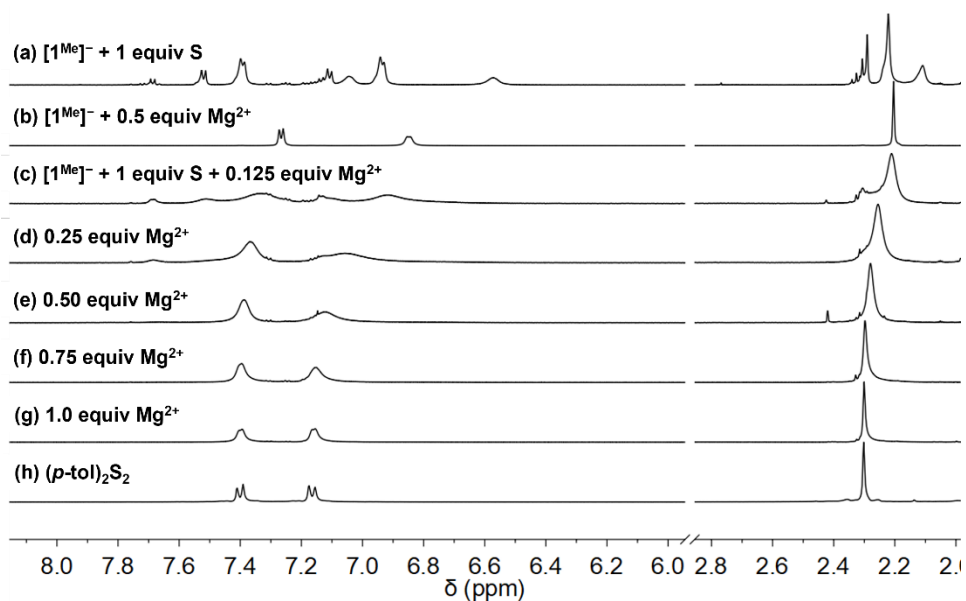

**Figure S37.** <sup>1</sup>H NMR spectra of (a) [Et<sub>4</sub>N][**1**] treated with 1/8 equiv S<sub>8</sub>, (b) [Et<sub>4</sub>N][**1**] treated with 0.5 equiv Mg(ClO<sub>4</sub>)<sub>2</sub>, (c) [Et<sub>4</sub>N][**1**] treated with 1/8 equiv S<sub>8</sub> and 0.125 equiv Mg(OTf)<sub>2</sub>, (d) the same solution with 0.25 equiv Mg(OTf)<sub>2</sub>, (e) the same solution with 0.50 equiv Mg(OTf)<sub>2</sub>, (f) the same solution with 0.75 equiv Mg(OTf)<sub>2</sub>, (g) the same solution with 1.0 equiv Mg(OTf)<sub>2</sub>, and (h) (p-tol)<sub>2</sub>S<sub>2</sub> in CD<sub>3</sub>CN at 20 °C.

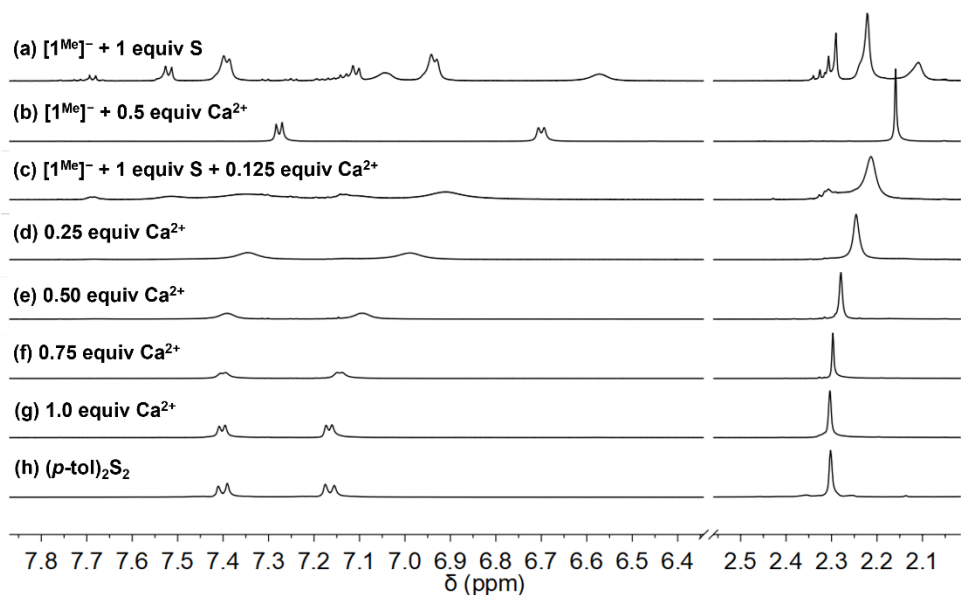

**Figure S38.** <sup>1</sup>H NMR spectra of (a) [Et<sub>4</sub>N][**1**<sup>Me</sup>] treated with 1/8 equiv S<sub>8</sub>, (b) [Et<sub>4</sub>N][**1**] treated with 0.5 equiv Ca(OTf)<sub>2</sub>, (c) [Et<sub>4</sub>N][**1**] treated with 1/8 equiv S<sub>8</sub> and 0.125 equiv Ca(OTf)<sub>2</sub>, (d) the same solution with 0.25 equiv Ca(OTf)<sub>2</sub>, (e) the same solution with 0.50 equiv Ca(OTf)<sub>2</sub>, (f) the same solution with 0.75 equiv Ca(OTf)<sub>2</sub>, (g) the same solution with 1.0 equiv Ca(OTf)<sub>2</sub>, and (h) (p-tol)<sub>2</sub>S<sub>2</sub> in CD<sub>3</sub>CN at 20 °C.

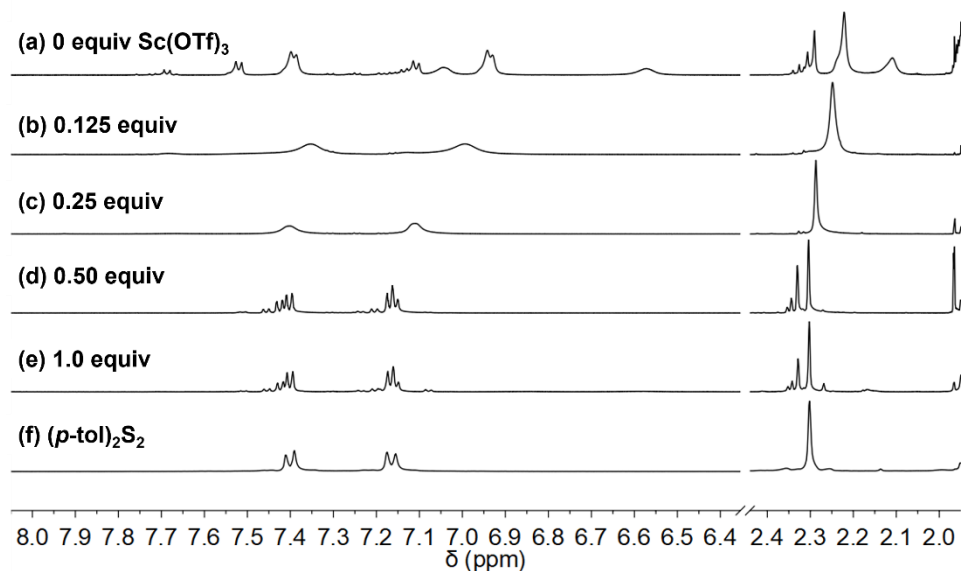

**Figure S39.**  $^1\text{H}$  NMR spectra of (a)  $[\text{Et}_4\text{N}][\mathbf{1}^{\text{Me}}]$  treated with 1/8 equiv  $\text{S}_8$ , (b) the same solution with 0.125 equiv  $\text{Sc}(\text{OTf})_3$ , (c) the same solution with 0.25 equiv  $\text{Sc}(\text{OTf})_3$ , (d) the same solution with 0.50 equiv  $\text{Sc}(\text{OTf})_3$ , (e) the same solution with 1.0 equiv  $\text{Sc}(\text{OTf})_3$ , and (f)  $(p\text{-tol})_2\text{S}_2$  in  $\text{CD}_3\text{CN}$  at  $20^\circ\text{C}$ .

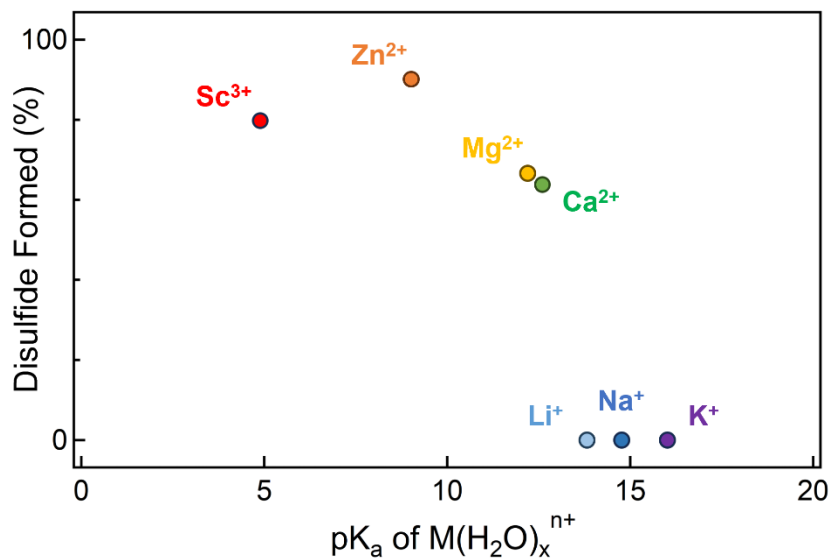

**Figure S40.** Comparison of  $\mathbf{3}^{\text{Me}}$  formed from a mixture of  $[\text{Et}_4\text{N}][\mathbf{1}^{\text{Me}}] + 1/8$  equiv  $\text{S}_8$  treated with 0.25 equiv  $\text{M}(\text{OTf})_n$  in  $\text{CD}_3\text{CN}$  (as measured by benzylic  $^1\text{H}$  shift) vs. Lewis acidity of metal cation (as measured by  $\text{pK}_a$  of metal aquo complex).



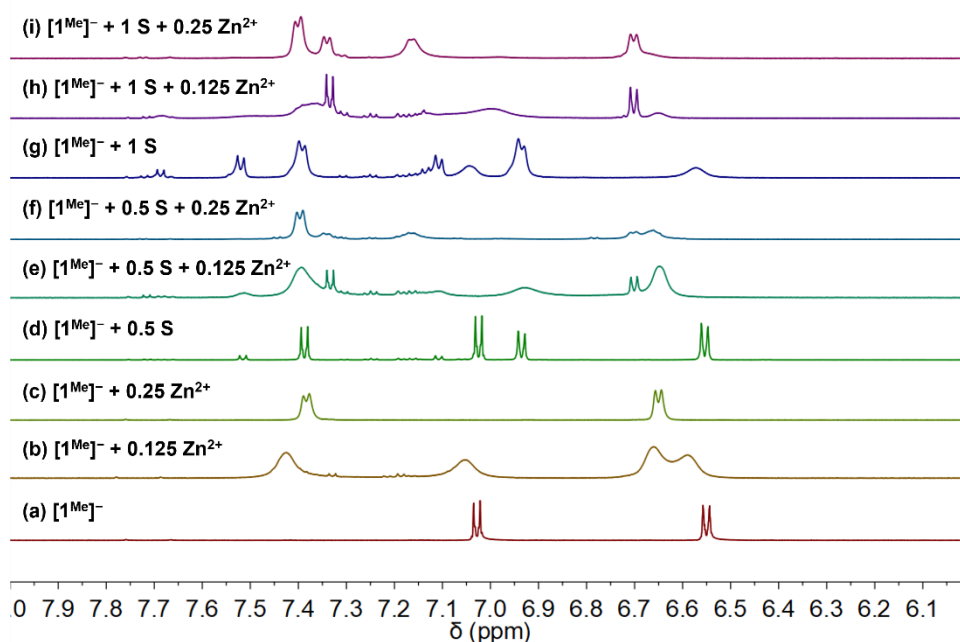

**Figure S41.**  $^1\text{H}$  NMR spectra of (a)  $[\text{Et}_4\text{N}][1^{\text{Me}}]$  treated with (b) 0.125 equiv  $\text{Zn}(\text{OTf})_2$ , (c) 0.25 equiv  $\text{Zn}(\text{OTf})_2$ , (d) 0.5 equiv S, (e) 0.5 equiv S + 0.125 equiv  $\text{Zn}(\text{OTf})_2$ , (f) 0.5 equiv S + 0.25 equiv  $\text{Zn}(\text{OTf})_2$ , (g) 1 equiv S, (h) 1 equiv S + 0.125 equiv  $\text{Zn}(\text{OTf})_2$ , (i) 1 equiv S + 0.25 equiv  $\text{Zn}(\text{OTf})_2$  in  $\text{CD}_3\text{CN}$  at  $20^\circ\text{C}$ .

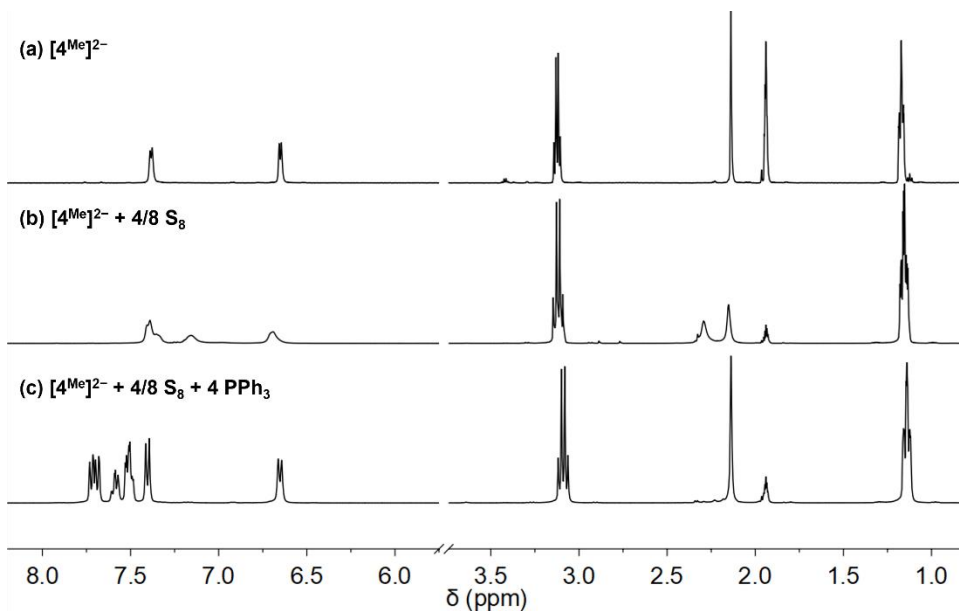

**Figure S42.**  $^1\text{H}$  NMR spectra of (a)  $[\text{Et}_4\text{N}]_2[4^{\text{Me}}]$  treated with (b)  $\text{S}_8$  (4 equiv S), then with (c)  $\text{PPh}_3$  (4 equiv) in  $\text{CD}_3\text{CN}$  at  $20^\circ\text{C}$ .

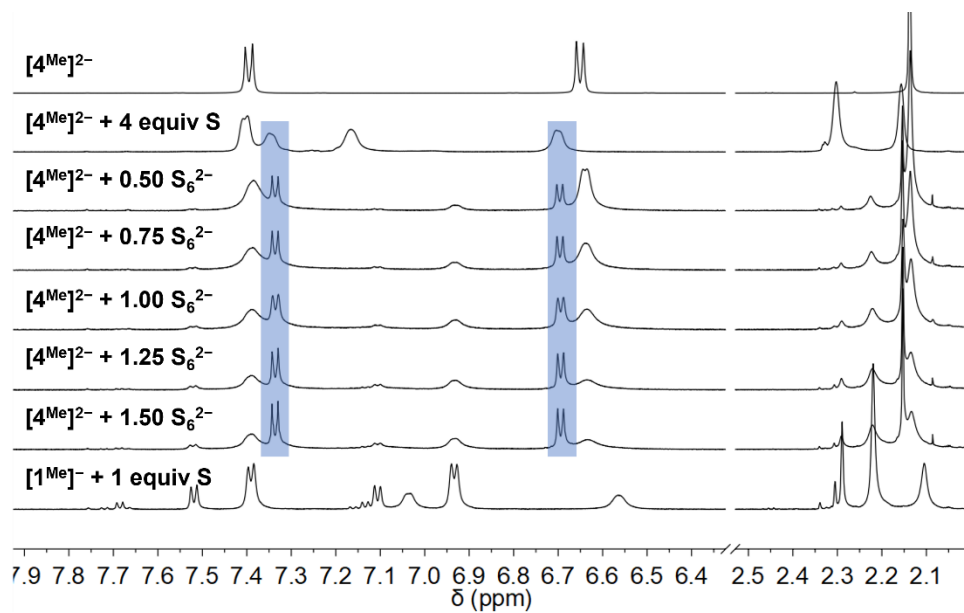

**Figure S43.** <sup>1</sup>H NMR spectra of [Et<sub>4</sub>N]<sub>2</sub>[4<sup>Me</sup>] treated with increasing equiv [TBA]<sub>2</sub>[S<sub>6</sub>] in CD<sub>3</sub>CN at 20 °C. Peaks corresponding to [5<sup>Me</sup>]<sup>2-</sup> are highlighted.

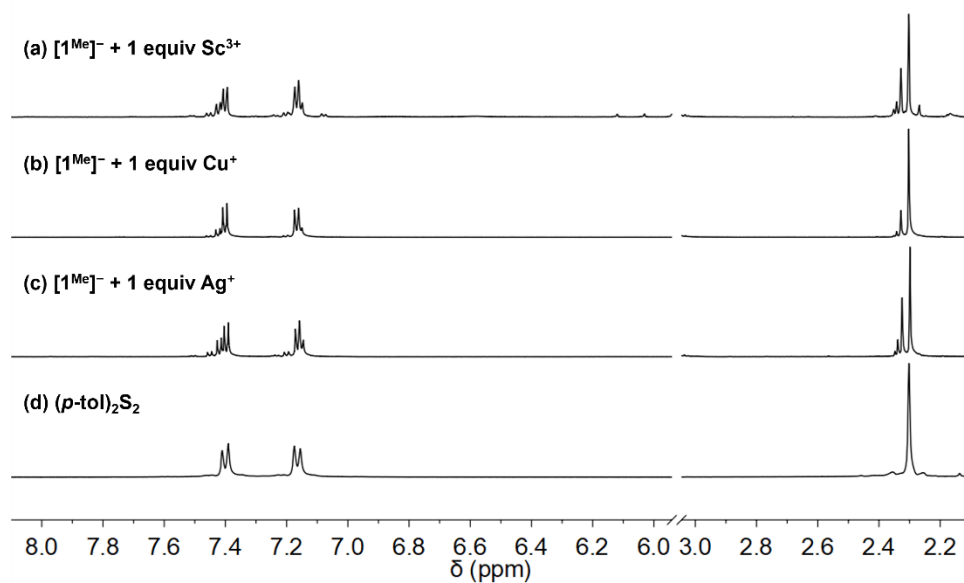

**Figure S44.** <sup>1</sup>H NMR spectra of [Et<sub>4</sub>N][1<sup>Me</sup>] treated with (a) 1 equiv Sc(OTf)<sub>3</sub>, (b) 1 equiv (CH<sub>3</sub>CN)<sub>4</sub>CuPF<sub>6</sub>, and (c) 1equiv Ag(OTf) in comparison to (d) (p-tol)<sub>2</sub>S<sub>2</sub> in CD<sub>3</sub>CN at 20 °C.

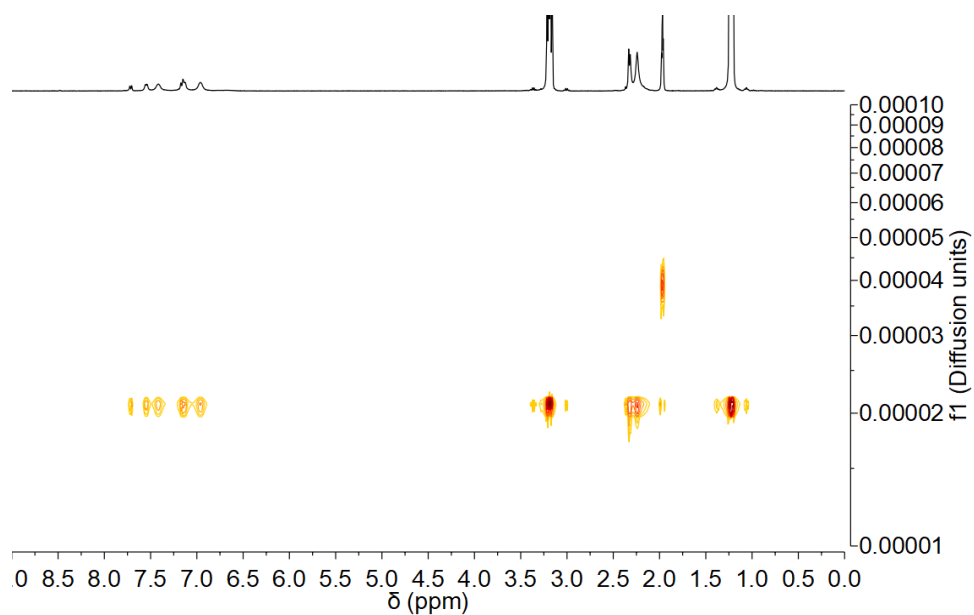

**Figure S45.** 2D  $^1\text{H}$  DOSY plot of  $[\text{Et}_4\text{N}][\mathbf{1}^{\text{Me}}]$  treated with  $\text{S}_8$  (1 S atom equiv) in  $\text{CD}_3\text{CN}$  at  $20^\circ\text{C}$ .

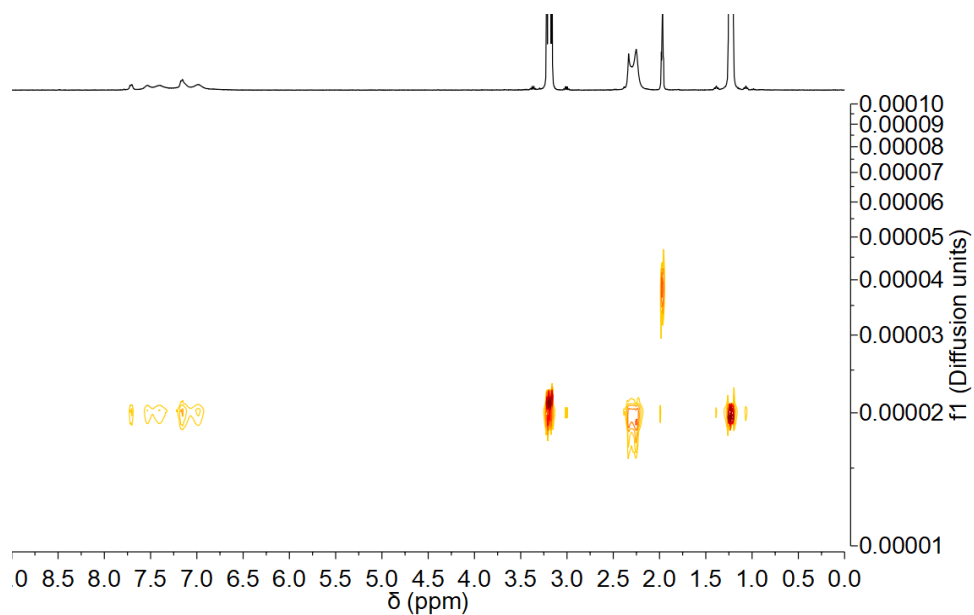

**Figure S46.** 2D  $^1\text{H}$  DOSY plot of  $[\text{Et}_4\text{N}][\mathbf{1}^{\text{Me}}]$  treated with  $\text{S}_8$  (1 S atom equiv) and 1 equiv  $\text{LiOTf}$  in  $\text{CD}_3\text{CN}$  at  $20^\circ\text{C}$ .

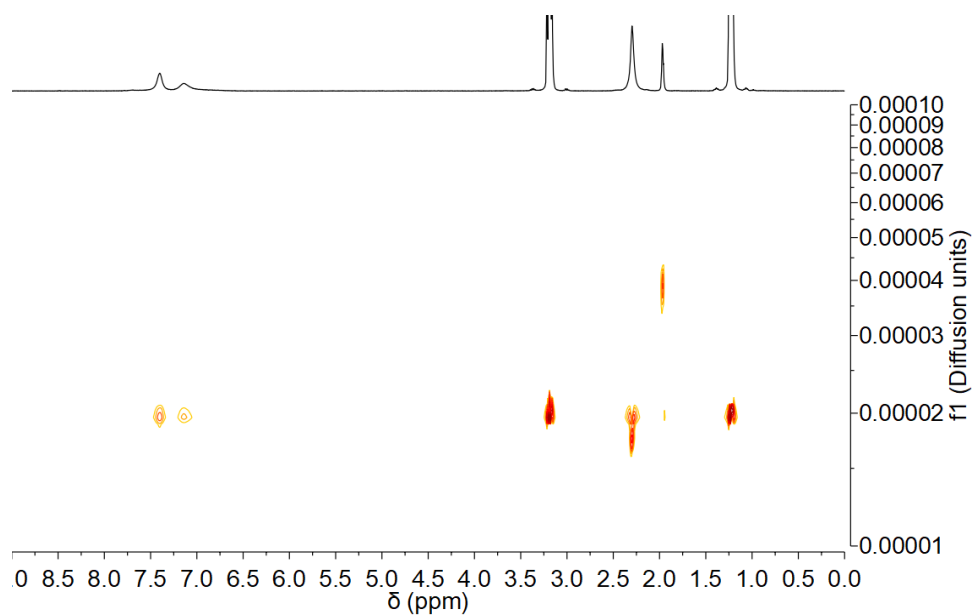

**Figure S47.** 2D  $^1\text{H}$  DOSY plot of  $[\text{Et}_4\text{N}][\mathbf{1}^{\text{Me}}]$  treated with  $\text{S}_8$  (1 S atom equiv) and 0.25 equiv  $\text{Mg}(\text{OTf})_2$  in  $\text{CD}_3\text{CN}$  at  $20^\circ\text{C}$ .

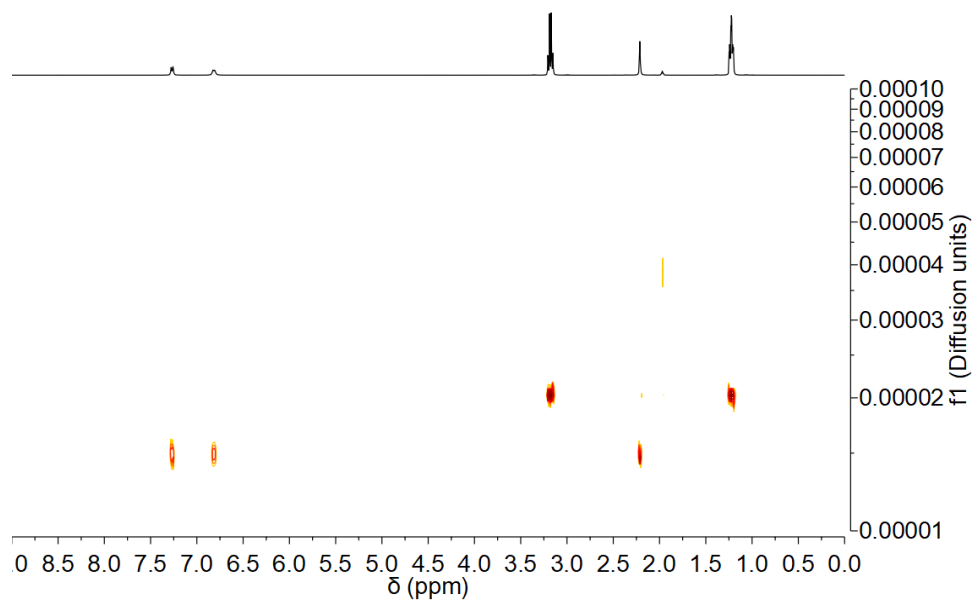

**Figure S48.** 2D  $^1\text{H}$  DOSY plot of  $[\text{Et}_4\text{N}][\mathbf{1}^{\text{Me}}]$  treated with 0.5 equiv  $\text{Mg}(\text{OTf})_2$  to form “ $\text{Mg}(p\text{-olS})_2$ ” in  $\text{CD}_3\text{CN}$  at  $20^\circ\text{C}$ .

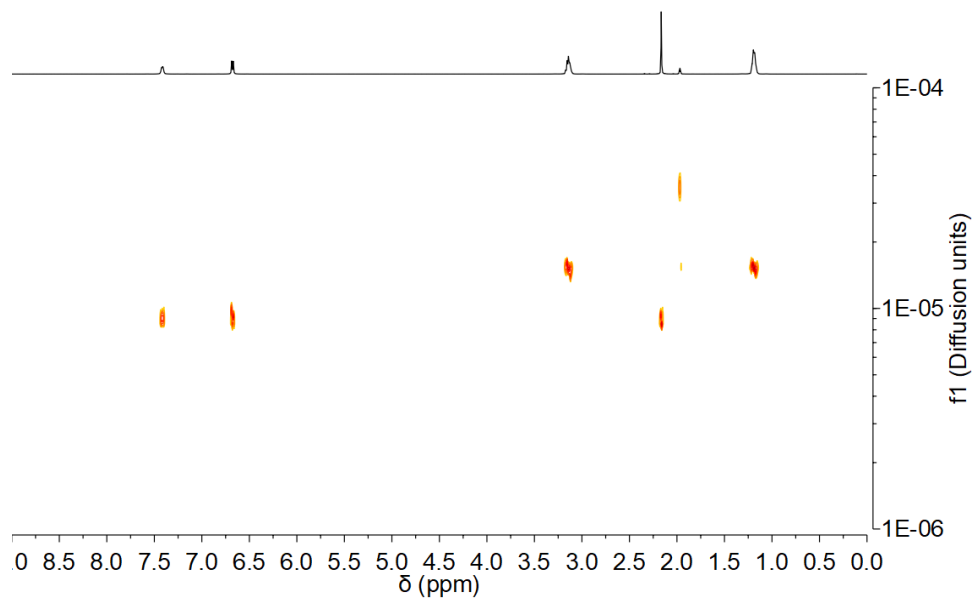

**Figure S49.** 2D  $^1\text{H}$  DOSY plot of  $[\text{Et}_4\text{N}]_2[4^{\text{Me}}]$  in  $\text{CD}_3\text{CN}$  at  $20^\circ\text{C}$ .

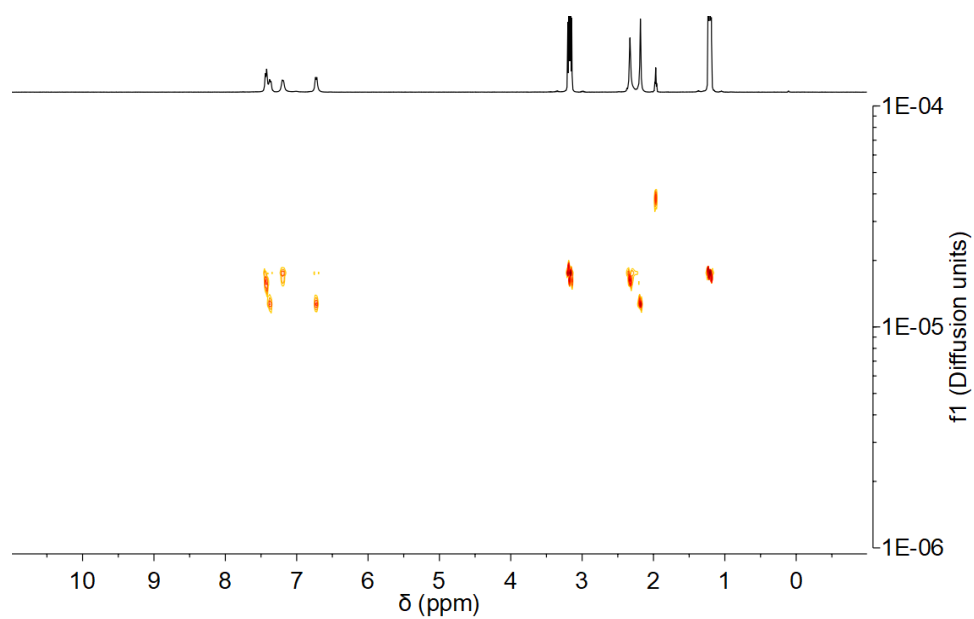

**Figure S50.** 2D  $^1\text{H}$  DOSY plot of  $[\text{Et}_4\text{N}][4^{\text{Me}}]$  treated with  $\text{S}_8$  (4 S atom equiv) to form  $[5^{\text{Me}}]^{2-}$  and  $3^{\text{Me}}$  in  $\text{CD}_3\text{CN}$  at  $20^\circ\text{C}$ .

**Table S1.** Relative diffusion coefficients and hydrodynamic radii of [1Me]<sup>-</sup> treated with S8 (1 S atom equiv), the same mixture treated with 1 equiv LiOTf, the same mixture treated with 0.25 equiv Mg(OTf)<sub>2</sub>, [1Me]<sup>-</sup> treated with 0.5 equiv Mg(OTf)<sub>2</sub>, [4Me]<sub>2</sub><sup>-</sup>, and [5Me]<sub>2</sub><sup>-</sup>.<sup>3-4</sup> Calculated molecular weight values were approximated using the Stokes-Einstein-Gierer-Wirtz model<sup>5</sup> with solvent parameters defined for THF-*d*<sub>8</sub> in place of CD<sub>3</sub>CN.<sup>3-6</sup>

|                                                             | <b>Avg. D</b><br>( $\times 10^{-9} \text{ m}^2 \cdot \text{s}^{-1}$ ) | <b>Std. Error<sup>a</sup></b> | <b>R<sub>H</sub></b><br>( $\times 10^{-10} \text{ m}$ ) | <b>MW</b><br>( $\text{g} \cdot \text{mol}^{-1}$ ) |
|-------------------------------------------------------------|-----------------------------------------------------------------------|-------------------------------|---------------------------------------------------------|---------------------------------------------------|
| <i>p</i> -tolS <sup>-</sup> + S                             | 2.10                                                                  | ± 0.01                        | 2.98                                                    | 75                                                |
| <i>p</i> -tolS <sup>-</sup> + S + LiOTf                     | 2.02                                                                  | ± 0.02                        | 3.10                                                    | 81                                                |
| <i>p</i> -tolS <sup>-</sup> + S + 0.25 Mg(OTf) <sub>2</sub> | 1.96                                                                  | ± 0.04                        | 3.19                                                    | 85                                                |
| <i>p</i> -tolS <sup>-</sup> + 0.5 Mg(OTf) <sub>2</sub>      | 1.49                                                                  | ± 0.04                        | 4.20                                                    | 143                                               |
| [Zn( <i>p</i> -tolS) <sub>4</sub> ] <sup>2-</sup> + 4 S     | 1.26                                                                  | ± 0.02                        | 4.96                                                    | 199                                               |
| [Zn( <i>p</i> -tolS) <sub>4</sub> ] <sup>2-</sup>           | 0.98                                                                  | ± 0.03                        | 6.36                                                    | 328                                               |

### ESI Mass Spectra

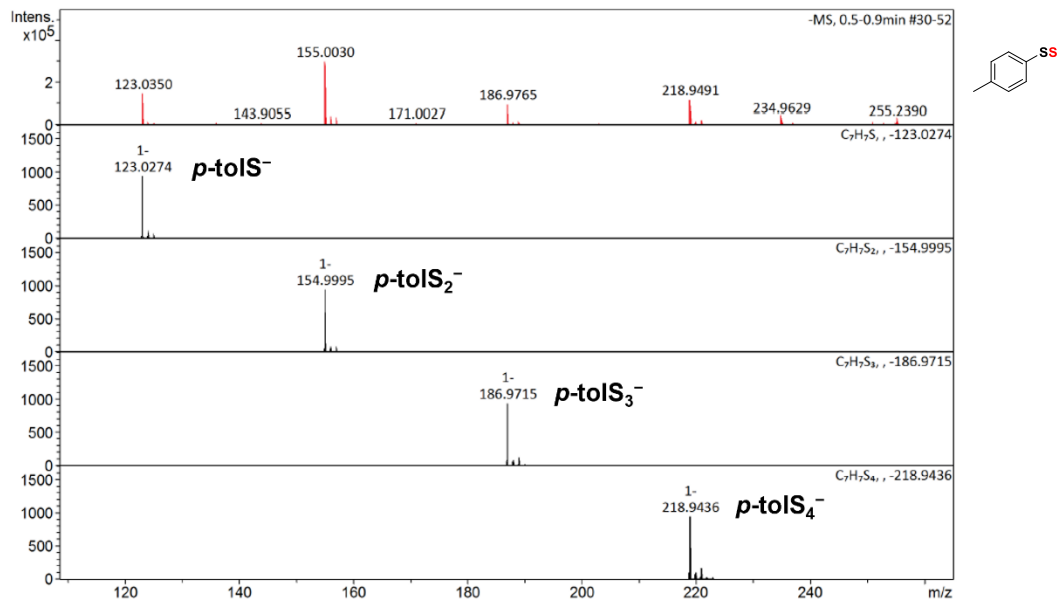

**Figure S51.** Negative ion mode ESI mass spectrum of a mixture of [Et<sub>4</sub>N][1Me<sup>-</sup>] and 1/8 equiv S<sub>8</sub> in CH<sub>3</sub>CN.

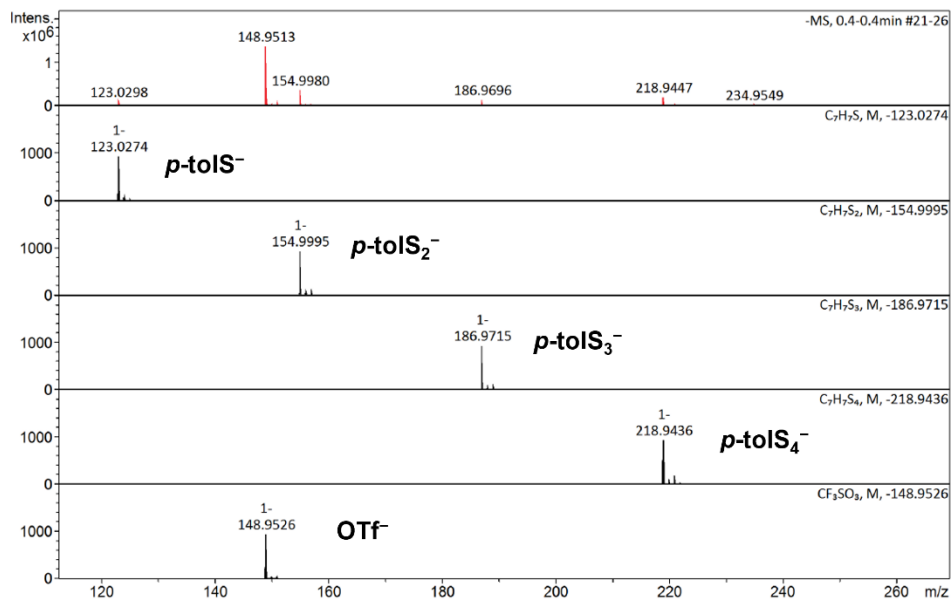

**Figure S52.** Negative ion mode ESI mass spectrum of a mixture of  $[\text{Et}_4\text{N}][\mathbf{1}^{\text{Me}}]$  treated with 1/8 equiv  $\text{S}_8$  and 1 equiv  $\text{LiOTf}$  in  $\text{CH}_3\text{CN}$ .

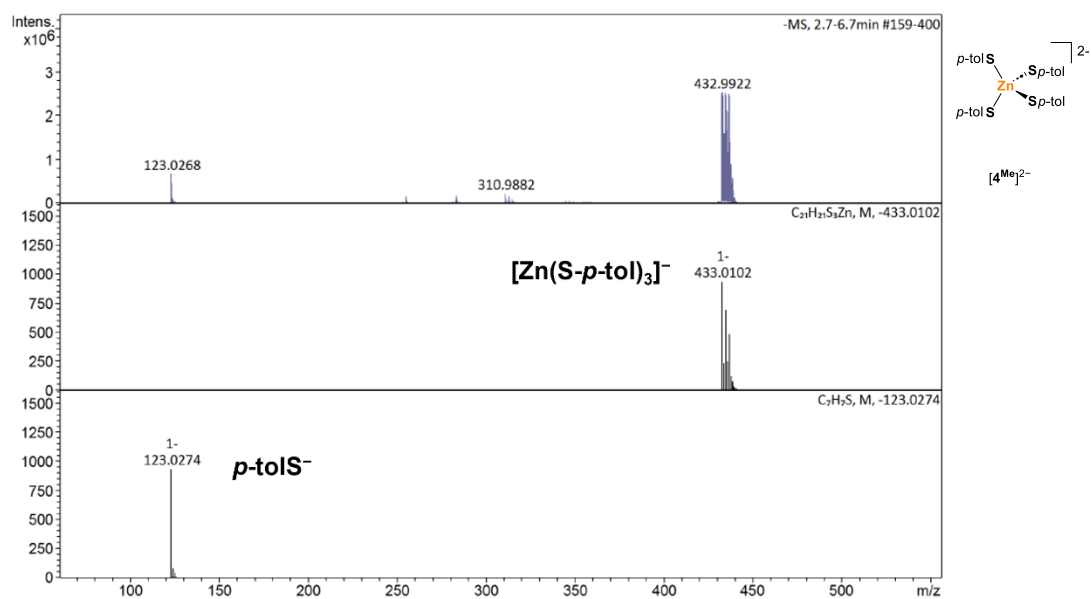

**Figure S53.** Negative ion mode ESI mass spectrum of  $[\text{Et}_4\text{N}]_2[\mathbf{4}^{\text{Me}}]$  in  $\text{CH}_3\text{CN}$ .

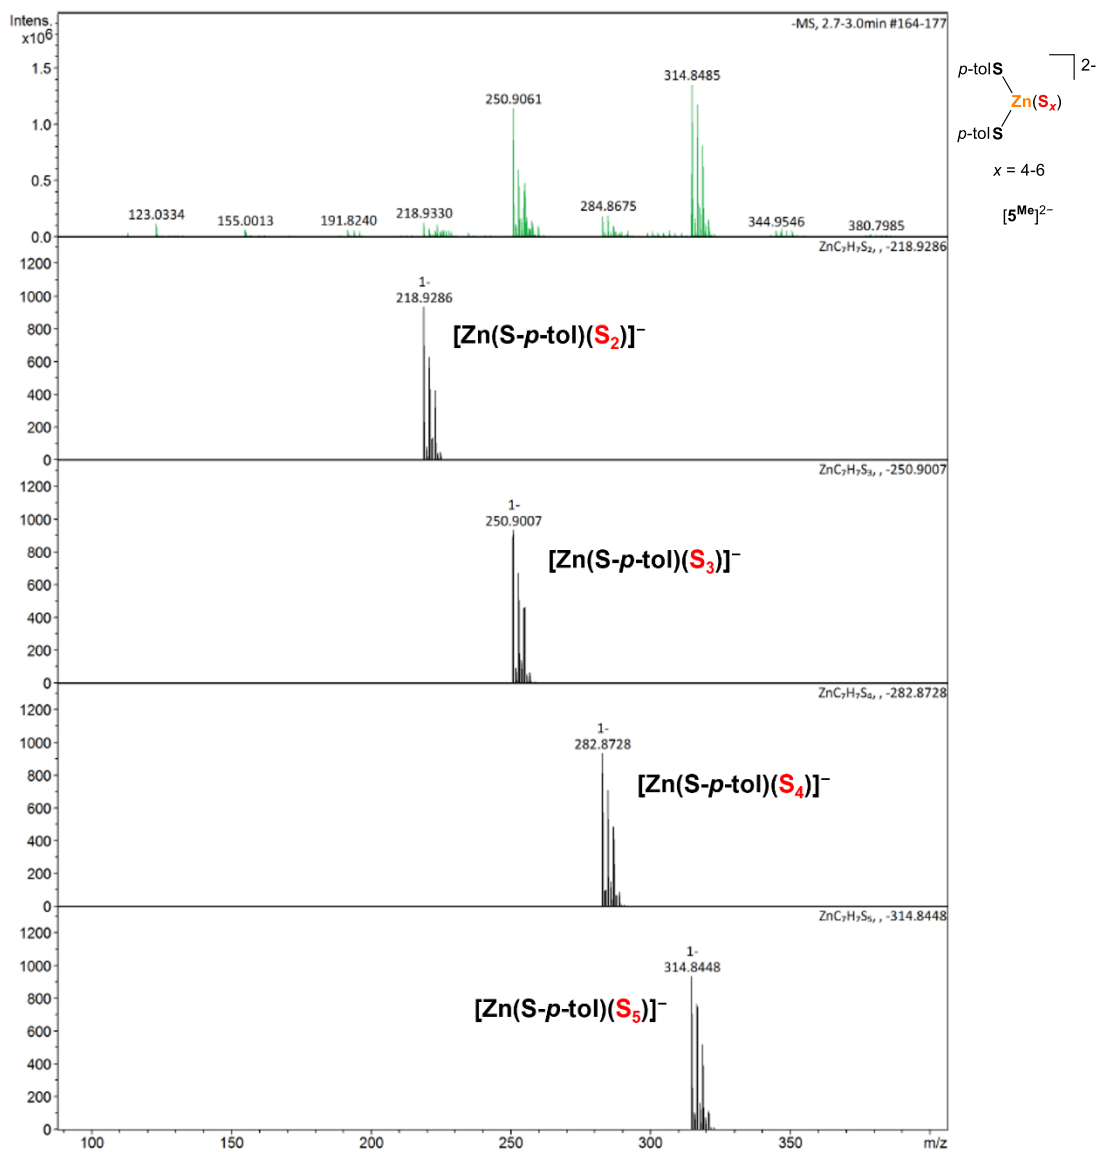

**Figure S54.** Negative ion mode ESI mass spectrum of  $[\text{Et}_4\text{N}]_2[\text{5Me}]$  prepared by treating a mixture of  $[\text{Et}_4\text{N}][\text{1Me}]$  and 1/8 equiv  $\text{S}_8$  with 0.25 equiv  $\text{Zn}(\text{OTf})_2$  in  $\text{CH}_3\text{CN}$ .



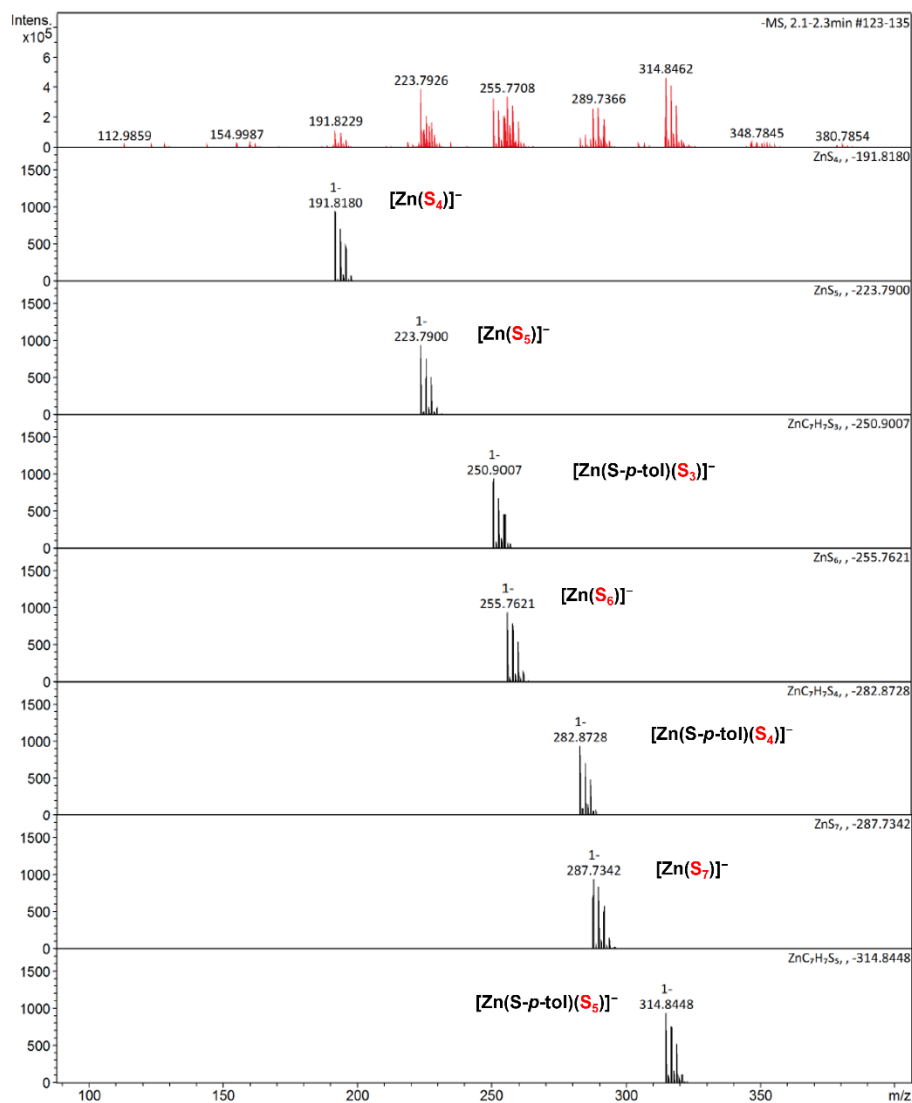

**Figure S55.** Negative ion mode ESI mass spectrum of  $[\text{Et}_4\text{N}]_2[\mathbf{5}^{\text{Me}}]$  and  $[\text{Et}_4\text{N}]_2[\mathbf{6}]$  prepared by treating a mixture of  $[\text{Et}_4\text{N}]_2[\mathbf{4}^{\text{Me}}]$  with 6/8 equiv  $\text{S}_8$  in  $\text{CH}_3\text{CN}$ .

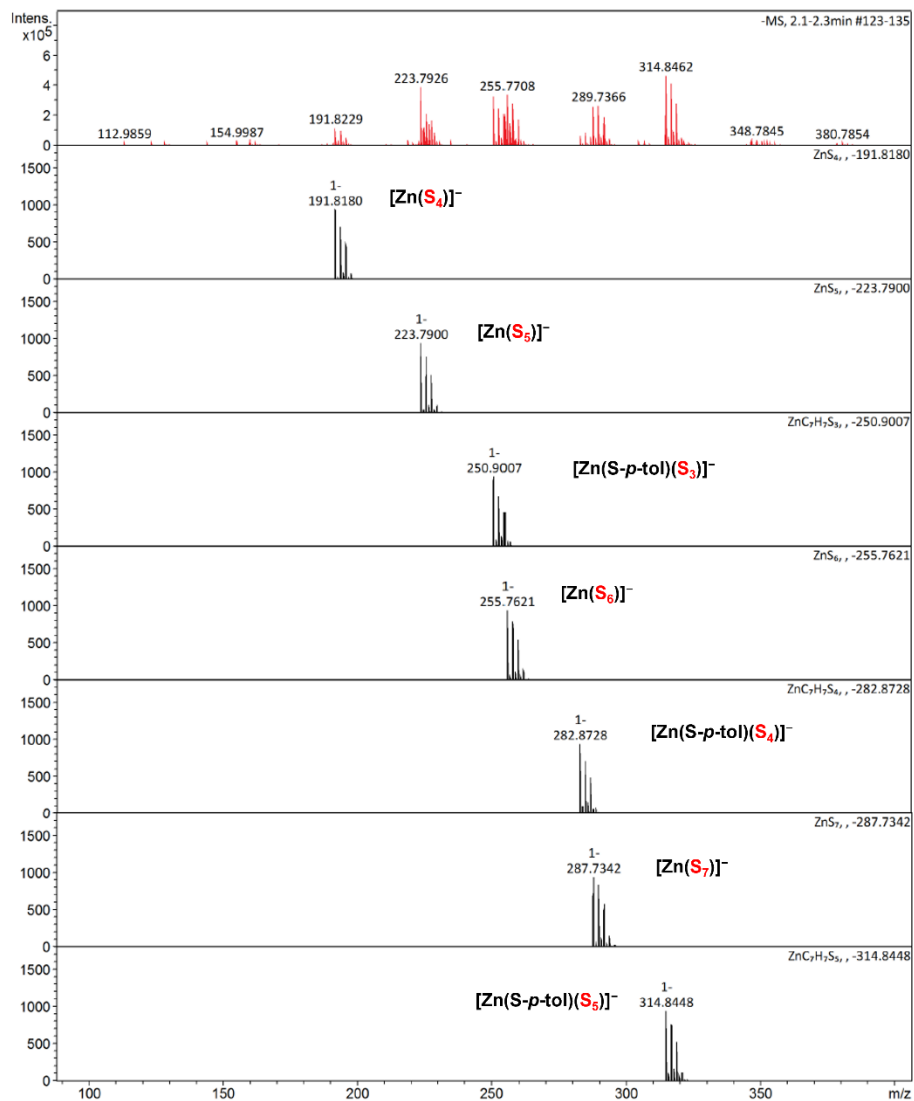

**Figure S56.** Negative ion mode ESI mass spectrum of  $[\text{Et}_4\text{N}]_2[\mathbf{5}^{\text{Me}}]$  and  $[\text{Et}_4\text{N}]_2[\mathbf{6}]$  prepared by treating a mixture of  $[\text{Et}_4\text{N}]_2[\mathbf{4}^{\text{Me}}]$  with 1 equiv  $\text{S}_8$  in  $\text{CH}_3\text{CN}$ .

### Electronic Absorption Spectra

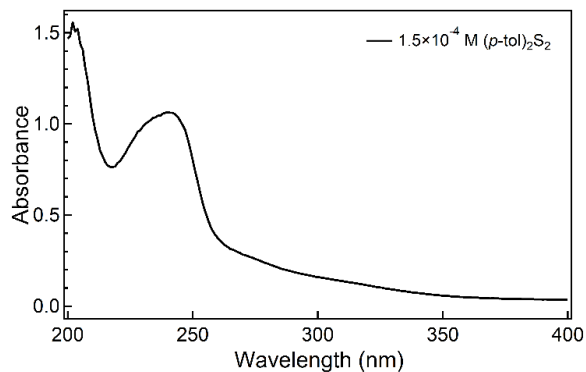

**Figure S57.** Electronic absorption spectrum of  $3^{\text{Me}}$  ( $1.50 \times 10^{-4} \text{ M}$ ) in  $\text{CH}_3\text{CN}$ .

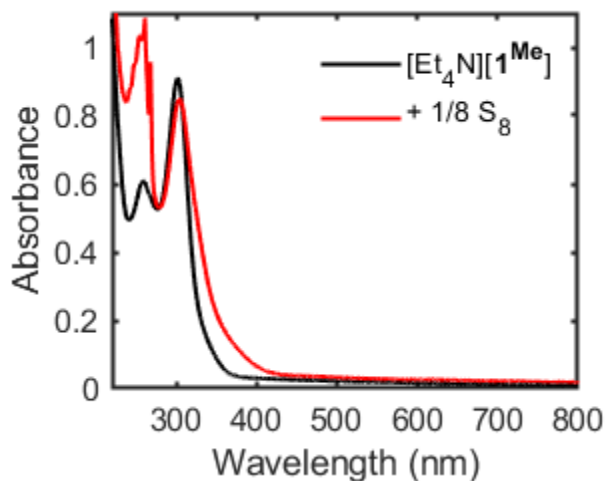

**Figure S58.** Electronic absorption spectra of  $7.67 \times 10^{-5} \text{ M}$   $[\text{Et}_4\text{N}][1^{\text{Me}}]$  (black) and  $[\text{Et}_4\text{N}][1^{\text{Me}}]$  ( $7.67 \times 10^{-5} \text{ M}$ ) treated with  $1/8 \text{ equiv S}_8$  (red) in  $\text{CH}_3\text{CN}$ .

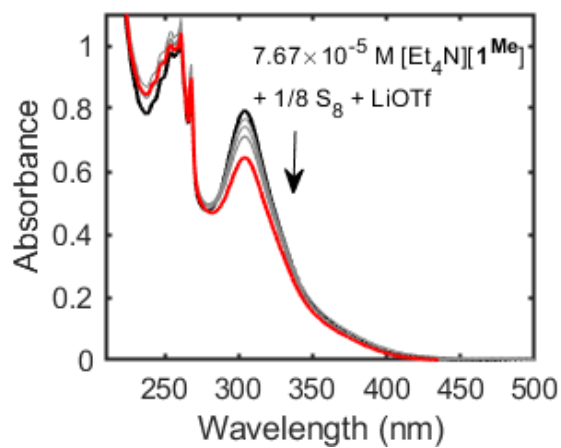

**Figure S59.** Electronic absorption spectra of  $7.67 \times 10^{-5} \text{ M}$   $[\text{Et}_4\text{N}][1^{\text{Me}}]$  (black) treated with  $1/8 \text{ equiv S}_8$  and  $1.0 \text{ equiv LiOTf}$  (red) in  $\text{CH}_3\text{CN}$ .

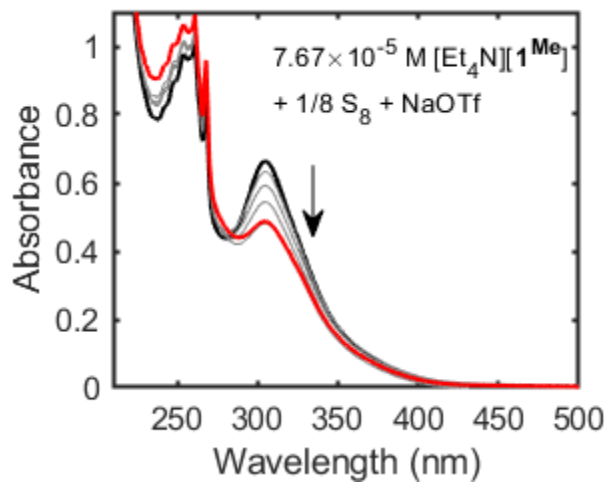

**Figure S60.** Electronic absorption spectra of  $7.67 \times 10^{-5}$  M  $[\text{Et}_4\text{N}][\mathbf{1}^{\text{Me}}]$  (black) treated with  $1/8$  equiv  $\text{S}_8$  and 1.0 equiv  $\text{NaOTf}$  (red) in  $\text{CH}_3\text{CN}$ .

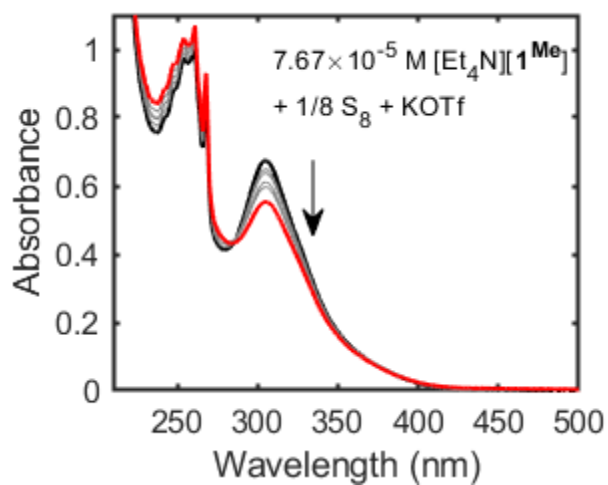

**Figure S61.** Electronic absorption spectra of  $7.67 \times 10^{-5}$  M  $[\text{Et}_4\text{N}][\mathbf{1}^{\text{Me}}]$  (black) treated with  $1/8$  equiv  $\text{S}_8$  and 1.0 equiv  $\text{KOTf}$  (red) in  $\text{CH}_3\text{CN}$ .

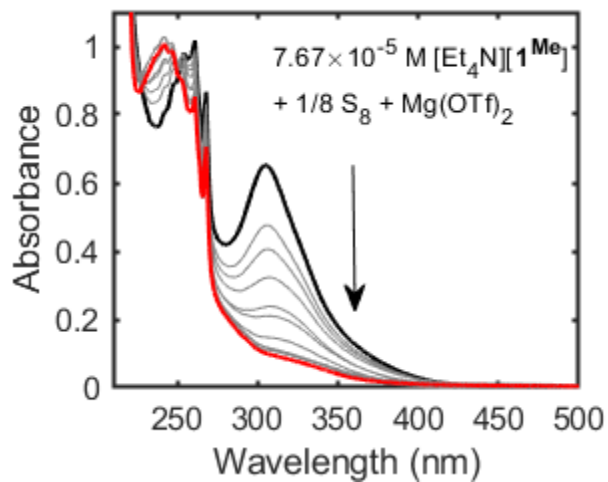

**Figure S62.** Electronic absorption spectra of  $7.67 \times 10^{-5}$  M  $[\text{Et}_4\text{N}][\mathbf{1}^{\text{Me}}]$  (black) treated with 1/8 equiv  $\text{S}_8$  and 1.0 equiv  $\text{Mg}(\text{OTf})_2$  (red) in  $\text{CH}_3\text{CN}$ .

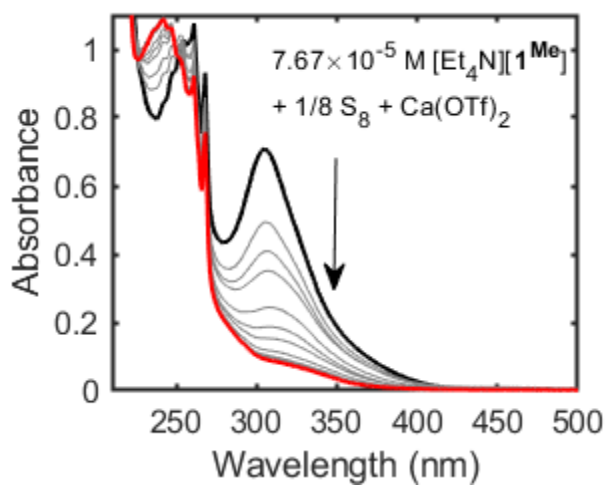

**Figure S63.** Electronic absorption spectra of  $7.67 \times 10^{-5}$  M  $[\text{Et}_4\text{N}][\mathbf{1}^{\text{Me}}]$  (black) treated with 1/8 equiv  $\text{S}_8$  and 1.0 equiv  $\text{Ca}(\text{OTf})_2$  (red) in  $\text{CH}_3\text{CN}$ .

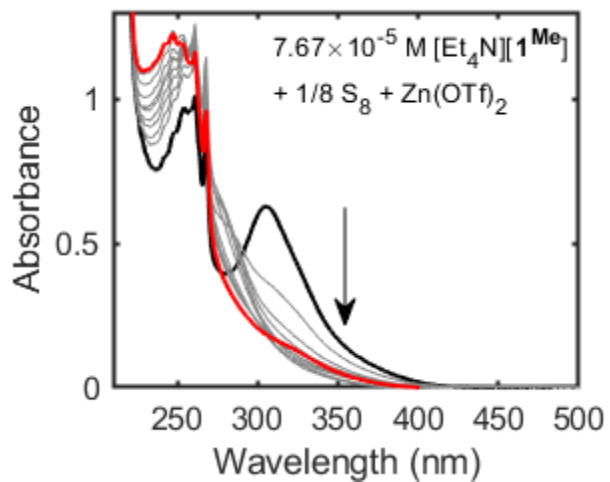

**Figure S64.** Electronic absorption spectra of  $7.67 \times 10^{-5} \text{ M [Et}_4\text{N][1}^{\text{Me}}]$  (black) treated with 1/8 equiv  $\text{S}_8$  and 1.0 equiv  $\text{Zn(OTf)}_2$  (red) in  $\text{CH}_3\text{CN}$ .

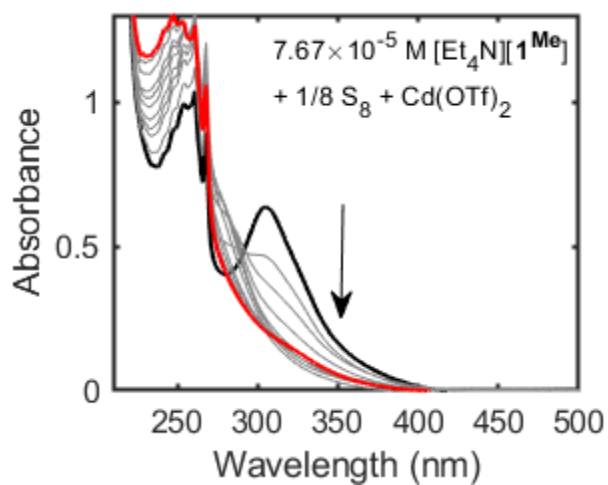

**Figure S65.** Electronic absorption spectra of  $7.67 \times 10^{-5} \text{ M [Et}_4\text{N][1}^{\text{Me}}]$  (black) treated with 1/8 equiv  $\text{S}_8$  and 1.0 equiv  $\text{Cd(OTf)}_2$  (red) in  $\text{CH}_3\text{CN}$ .

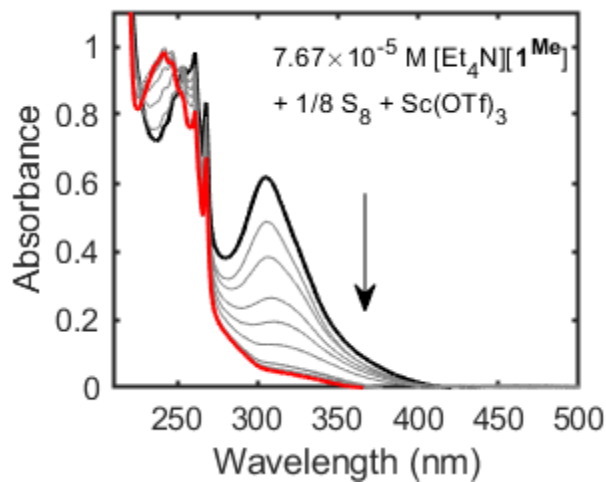

**Figure S66.** Electronic absorption spectra of  $7.67 \times 10^{-5} \text{ M } [\text{Et}_4\text{N}][\mathbf{1}^{\text{Me}}]$  (black) treated with  $1/8$  equiv  $\text{S}_8$  and  $1.0$  equiv  $\text{Sc}(\text{OTf})_3$  (red) in  $\text{CH}_3\text{CN}$ .

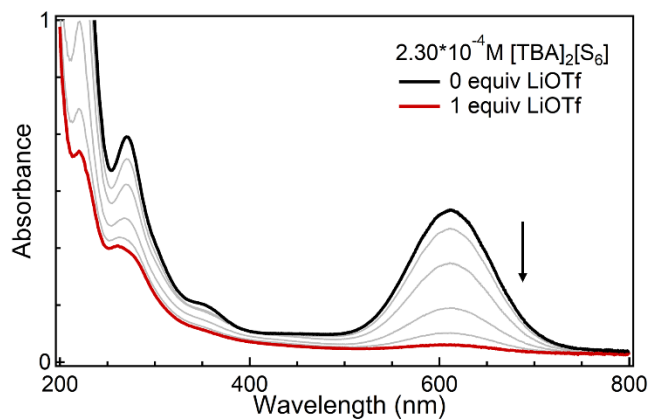

**Figure S67.** Electronic absorption spectra of  $2.30 \times 10^{-4} \text{ M } [\text{TBA}]_2[\text{S}_6]$  (black) treated with  $1.0$  equiv  $\text{LiOTf}$  (red) in  $\text{CH}_3\text{CN}$ .

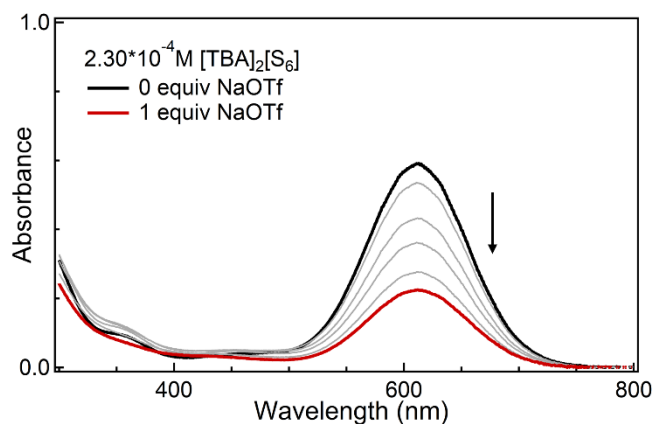

**Figure S68.** Electronic absorption spectra of  $2.30 \times 10^{-4} \text{ M } [\text{TBA}]_2[\text{S}_6]$  (black) treated with  $1.0$  equiv  $\text{NaOTf}$  (red) in  $\text{CH}_3\text{CN}$ .

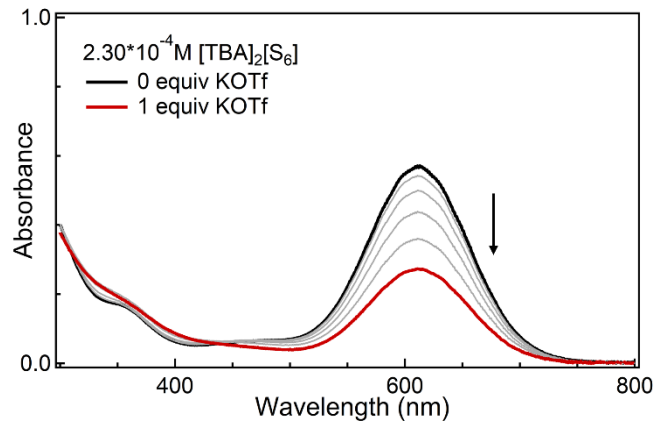

**Figure S69.** Electronic absorption spectra of  $2.30 \times 10^{-4}$  M [TBA]<sub>2</sub>[S<sub>6</sub>] (black) treated with 1.0 equiv KOTf (red) in CH<sub>3</sub>CN.

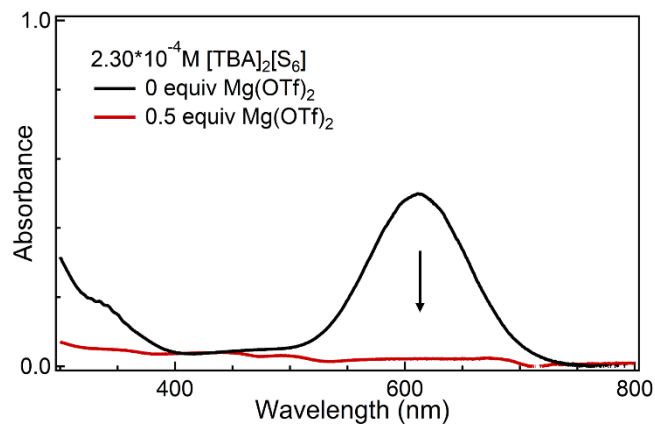

**Figure S70.** Electronic absorption spectra of  $2.30 \times 10^{-4}$  M [TBA]<sub>2</sub>[S<sub>6</sub>] (black) treated with 0.5 equiv Mg(OTf)<sub>2</sub> (red) in CH<sub>3</sub>CN.

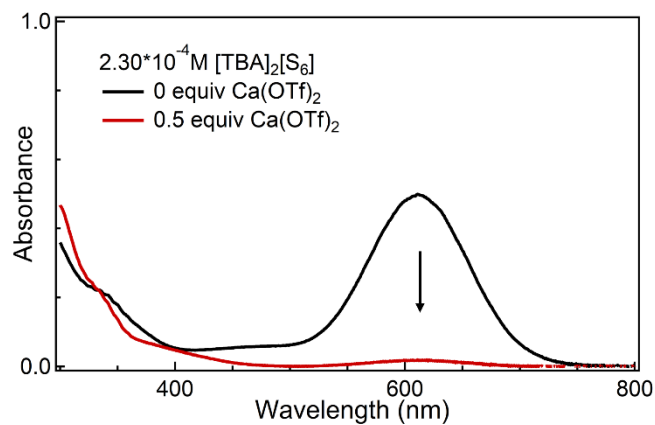

**Figure S71.** Electronic absorption spectra of  $2.30 \times 10^{-4}$  M [TBA]<sub>2</sub>[S<sub>6</sub>] (black) treated with 0.5 equiv Ca(OTf)<sub>2</sub> (red) in CH<sub>3</sub>CN.



### Cyclic Voltammograms

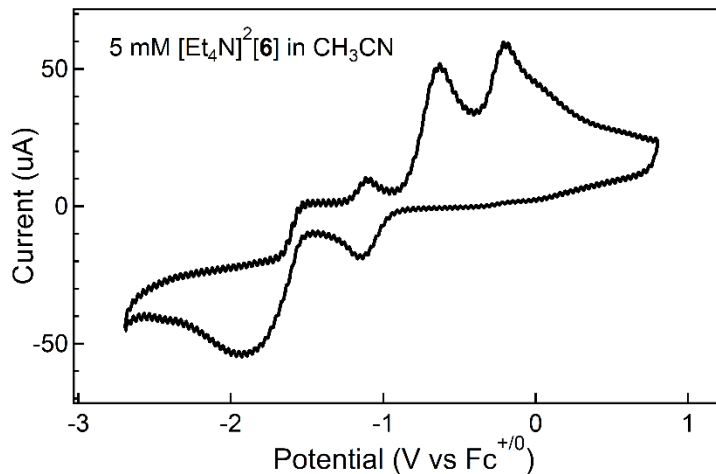

**Figure S72.** Cyclic voltammogram of [Et<sub>4</sub>N]<sub>2</sub>[6] (5mM) and 0.1 M TBAPF<sub>6</sub> in CH<sub>3</sub>CN.

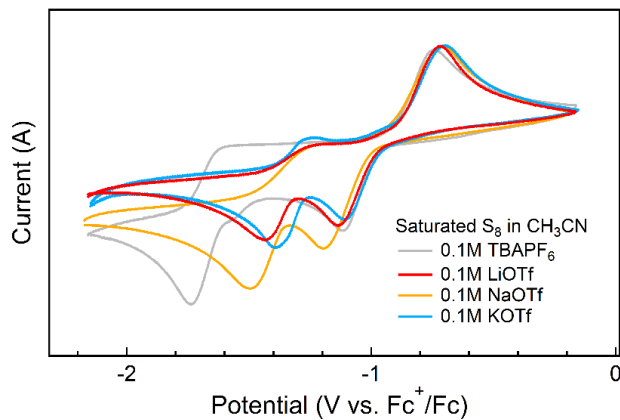

**Figure S73.** Cyclic voltammograms of solutions of saturated S<sub>8</sub> and 0.1 M Li<sup>+</sup>, Na<sup>+</sup>, and K<sup>+</sup> triflate salts in CH<sub>3</sub>CN.

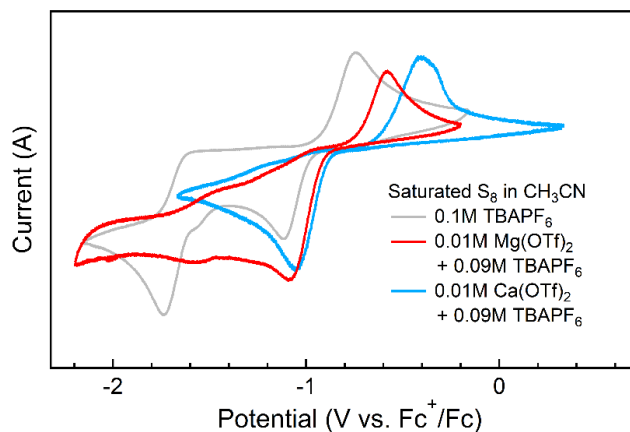

**Figure S74.** Cyclic voltammograms of solutions of saturated S<sub>8</sub>, 0.09 M TBAPF<sub>6</sub>, and 0.01 M Mg<sup>2+</sup> and Ca<sup>2+</sup> triflate salts in CH<sub>3</sub>CN.

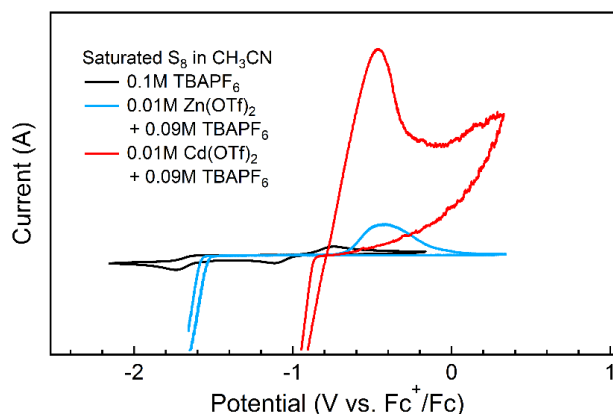

**Figure S75.** Cyclic voltammograms of solutions of saturated S<sub>8</sub>, 0.09 M TBAPF<sub>6</sub>, and 0.01 M Zn<sup>2+</sup> and Cd<sup>2+</sup> triflate salts in CH<sub>3</sub>CN.

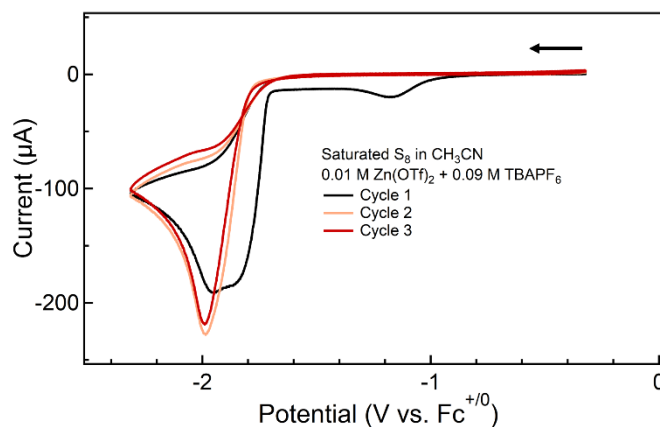

**Figure S76.** Cyclic voltammograms of a solution of saturated S<sub>8</sub>, 0.09 M TBAPF<sub>6</sub>, and 0.01 M Zn(OTf)<sub>2</sub> in CH<sub>3</sub>CN demonstrating disappearance of initial S<sub>8</sub> reduction after the first cycle.

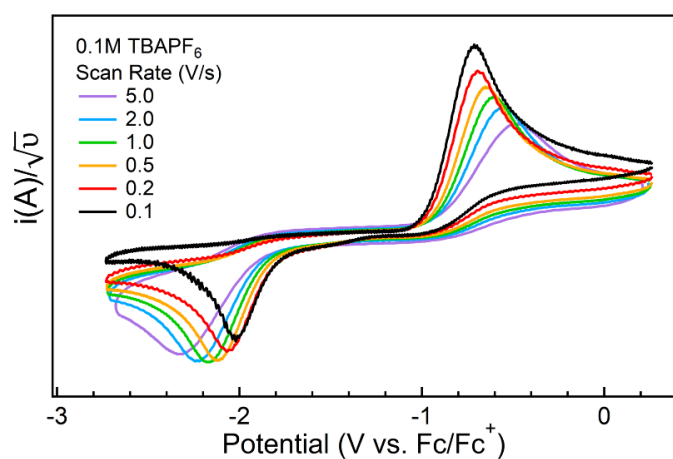

**Figure S77.** Cyclic voltammograms at varying scan rates of 5mM [Et<sub>4</sub>N][1<sup>Me</sup>e] and 0.1 M TBAPF<sub>6</sub> in CH<sub>3</sub>CN.

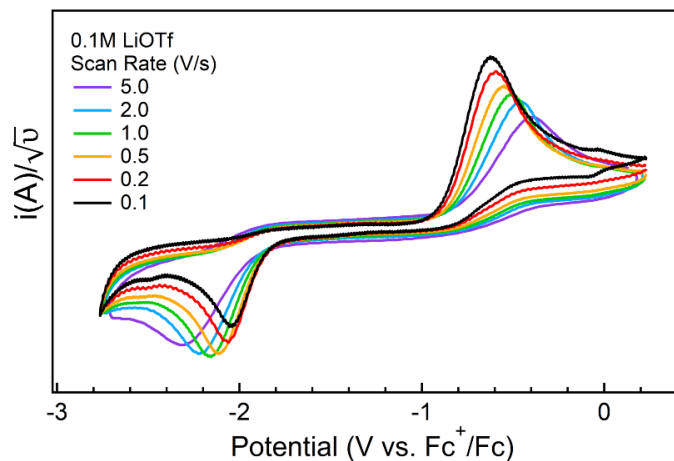

**Figure S78.** Cyclic voltammograms at varying scan rates of 5mM [Et<sub>4</sub>N][1<sup>Me</sup>] and 0.1 M LiOTf in CH<sub>3</sub>CN.

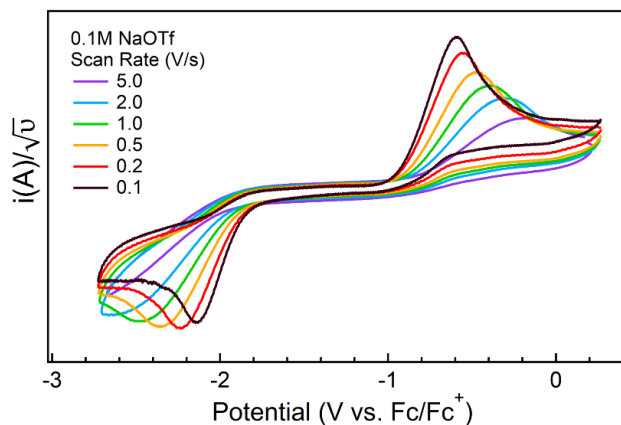

**Figure S79.** Cyclic voltammograms at varying scan rates of 5mM [Et<sub>4</sub>N][1<sup>Me</sup>] and 0.1 M NaOTf in CH<sub>3</sub>CN.

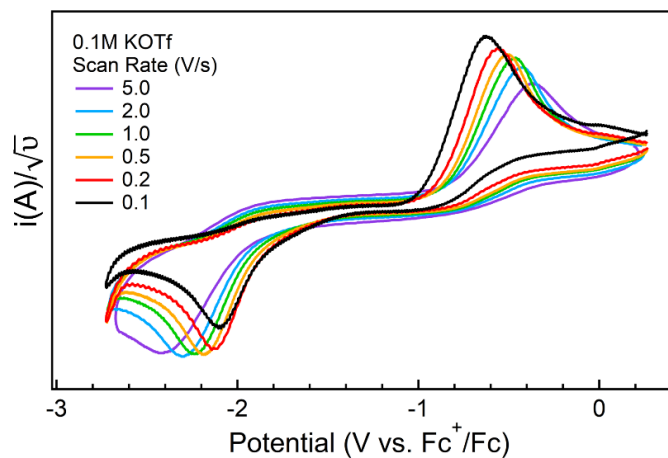

**Figure S80.** Cyclic voltammograms at varying scan rates of 5mM [Et<sub>4</sub>N][1<sup>Me</sup>] and 0.1 M KOTf in CH<sub>3</sub>CN.

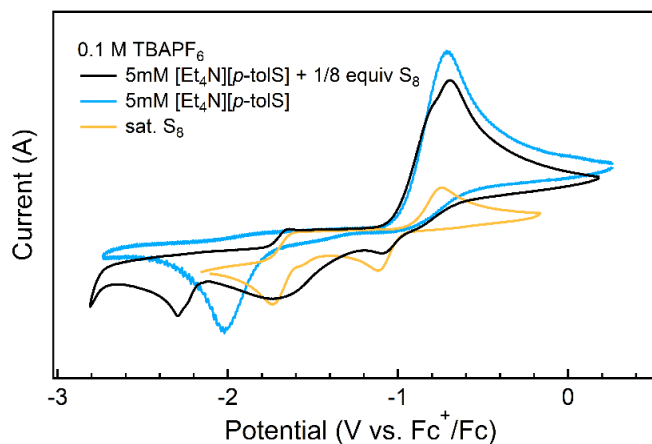

**Figure S81.** Cyclic voltammogram of 5mM  $[\text{Et}_4\text{N}][\mathbf{1}^{\text{Me}}]$  treated with 1/8 equiv  $\text{S}_8$  in 0.1 M TBAPF<sub>6</sub> in CH<sub>3</sub>CN compared against those of  $[\text{Et}_4\text{N}][\mathbf{1}^{\text{Me}}]$  and  $\text{S}_8$ .

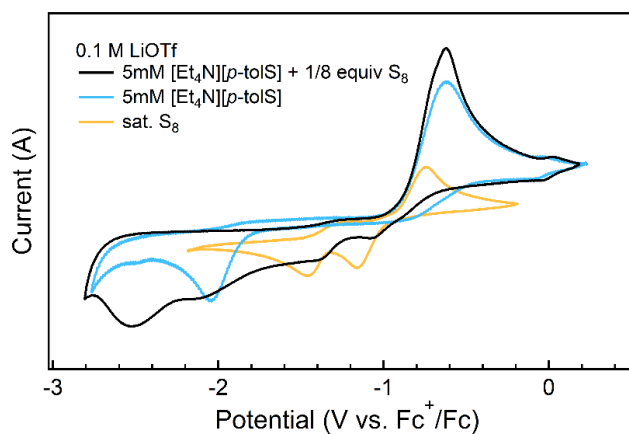

**Figure S82.** Cyclic voltammogram of 5mM  $[\text{Et}_4\text{N}][\mathbf{1}^{\text{Me}}]$  treated with 1/8 equiv  $\text{S}_8$  in 0.1 M LiOTf in CH<sub>3</sub>CN compared against those of  $[\text{Et}_4\text{N}][\mathbf{1}^{\text{Me}}]$  and  $\text{S}_8$ .

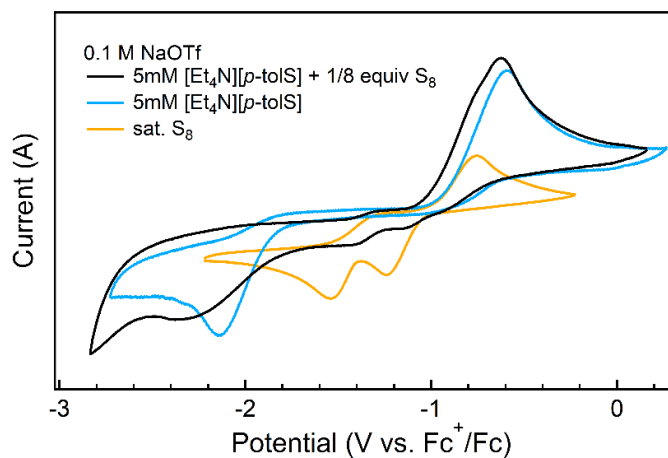

**Figure S83.** Cyclic voltammogram of 5mM  $[\text{Et}_4\text{N}][\mathbf{1}^{\text{Me}}]$  treated with 1/8 equiv  $\text{S}_8$  in 0.1 M NaOTf in CH<sub>3</sub>CN compared against those of  $[\text{Et}_4\text{N}][\mathbf{1}^{\text{Me}}]$  and  $\text{S}_8$ .

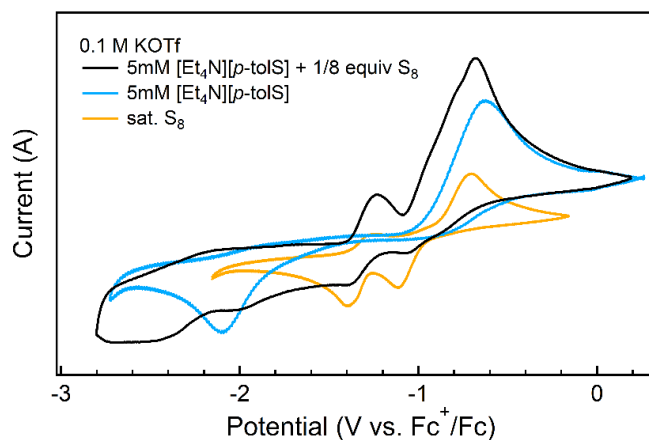

**Figure S84.** Cyclic voltammogram of 5mM  $[\text{Et}_4\text{N}][\mathbf{1}^{\text{Me}}]$  treated with 1/8 equiv  $\text{S}_8$  in 0.1 M KOTf in  $\text{CH}_3\text{CN}$  compared against those of  $[\text{Et}_4\text{N}][\mathbf{1}^{\text{Me}}]$  and  $\text{S}_8$ .

**Powder X-ray Diffraction**

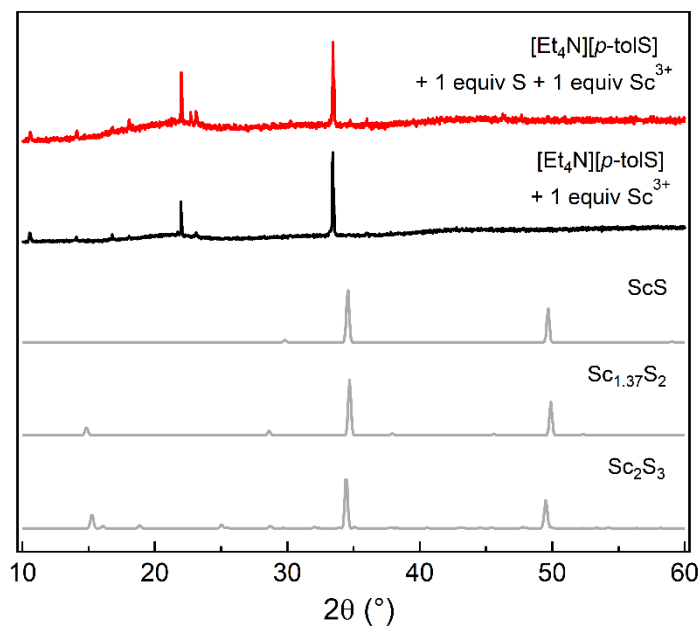

**Figure S85.** PXRD of  $[\text{Et}_4\text{N}][\mathbf{1}^{\text{Me}}]$  treated with  $\text{S}_8$  (1 equiv S) and  $\text{Sc}(\text{OTf})_3$ , attributed to scandium thiolate species and no matches to any patterns corresponding to structurally characterized scandium sulfide compounds reported in the ICSD (bottom half).

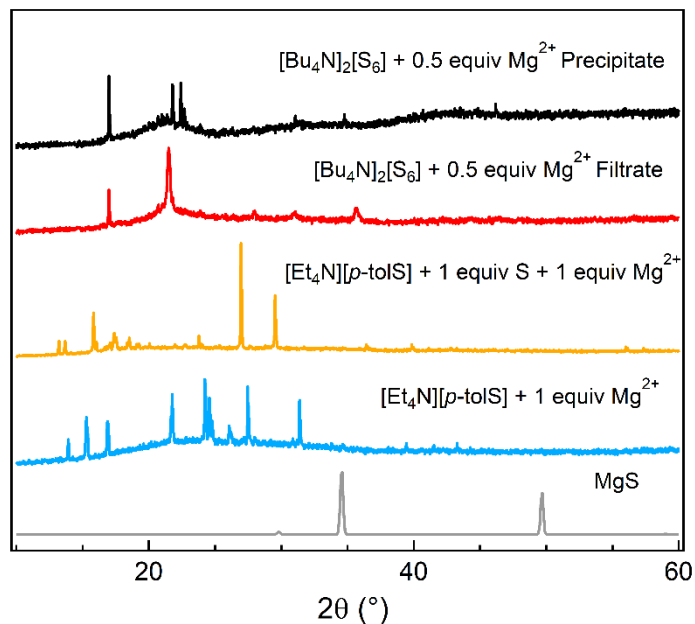

**Figure S86.** PXRD of [*n*-Bu<sub>4</sub>N]<sub>2</sub>[S<sub>6</sub>] and [Et<sub>4</sub>N][1<sup>Me</sup>] treated with S<sub>8</sub> (1 equiv S) and Mg(OTf)<sub>2</sub>, attributed to magnesium thiolate and magnesium sulfide species with no match to structurally characterized MgS reported in the ICSD (bottom).

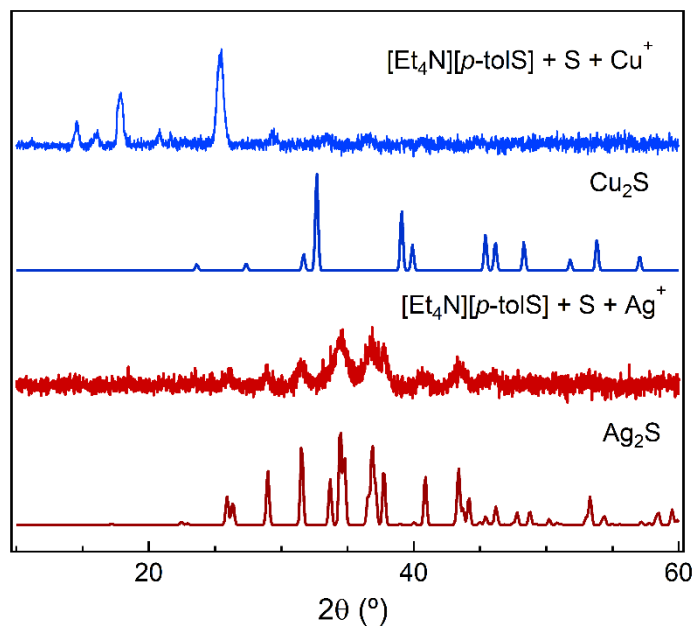

**Figure S87.** PXRD of [Et<sub>4</sub>N][1<sup>Me</sup>] treated with S<sub>8</sub> (1 equiv S) and (CH<sub>3</sub>CN)<sub>4</sub>CuPF<sub>6</sub> or AgOTf (1 equiv) with comparison to literature pattern for Cu<sub>2</sub>S and Ag<sub>2</sub>S obtained from ICSD. The pattern obtained with Cu<sup>+</sup> does not fit any of those corresponding to structurally characterized compounds reported in the ICSD.

**Crystallographic Details.** CCDC 2332488 contains the supplementary crystallographic data for this paper. These data can be obtained free of charge from The Cambridge Crystallographic Data Centre via [www.ccdc.cam.ac.uk/data\\_request.cif](http://www.ccdc.cam.ac.uk/data_request.cif).

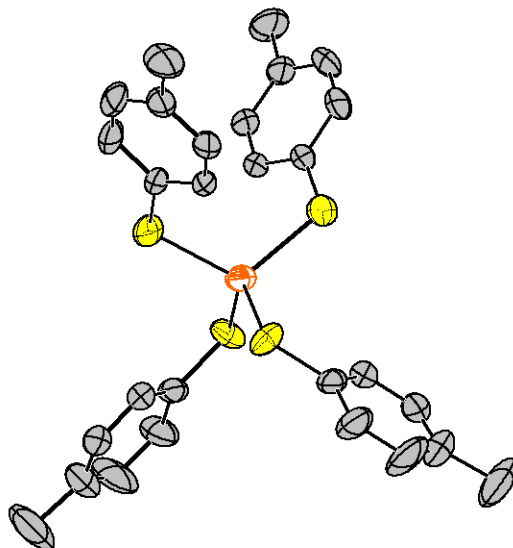

**Figure S88.** Solid-state structure of  $[\text{Et}_4\text{N}]_2[\mathbf{4}^{\text{Me}}]$  drawn as 50% thermal ellipsoids. Hydrogen atoms and counteranions omitted for clarity.

**Refinement details for  $[\text{Et}_4\text{N}]_2[\mathbf{4}^{\text{Me}}]$ .** Crystals of  $[\text{Et}_4\text{N}]_2[\mathbf{4}^{\text{Me}}]$  were grown from slow cooling of a saturated solution in  $\text{CH}_3\text{CN}$  at  $-30^\circ\text{C}$ . Crystals were mounted on a MiTeGen loop using Paratone oil, then placed on the diffractometer under a cold nitrogen stream. An arbitrary sphere of data was collected on a colorless prism, having approximate dimensions  $0.236 \times 0.262 \times 0.578$  mm, on a Bruker APEX-II CCD diffractometer using a combination of  $\omega$ - and  $\phi$ -scans of  $0.5^\circ$ .<sup>7</sup> Data were corrected for absorption and polarization effects and analyzed for space group determination.<sup>8</sup> The structure was solved by dual-space methods and expanded routinely.<sup>9</sup> The model was refined by full-matrix least-squares analysis of  $F^2$  against all reflections.<sup>10</sup> The  $\text{Et}_4\text{N}$  cations were found to be disordered across two independent inversion centers. Each was modeled with half occupancy atoms that were refined independent from all symmetry (PART -1). Non-hydrogen atoms were refined with anisotropic displacement parameters with hydrogen atoms riding on the atom to which they are bonded ( $U_{\text{iso}}(\text{H}) = 1.5U_{\text{eq}}(\text{C})$  for methyl,  $1.2U_{\text{eq}}(\text{C})$  for all others). No additional restraints or constraints were applied.

**Table S2.** Crystal and refinement data.

| Compound                                  | [Et <sub>4</sub> N] <sub>2</sub> [4 <sup>Me</sup> ]                                        |
|-------------------------------------------|--------------------------------------------------------------------------------------------|
| Empirical formula                         | C <sub>44</sub> H <sub>68</sub> N <sub>2</sub> S <sub>4</sub> Zn                           |
| Formula weight                            | 818.63                                                                                     |
| Temperature                               | 120.0 K                                                                                    |
| Wavelength                                | 0.71073 Å                                                                                  |
| Crystal system                            | Tetragonal                                                                                 |
| Space group                               | P4 <sub>3</sub> 2 <sub>1</sub> 2                                                           |
| Unit cell dimensions                      | a = 15.6496(8) Å<br>b = 15.6496(8) Å<br>c = 18.1435(13) Å<br>α = 90°<br>β = 90°<br>γ = 90° |
| Volume                                    | 4443.5(6) Å <sup>3</sup>                                                                   |
| Z                                         | 4                                                                                          |
| Density (calculated)                      | 1.224 g·cm <sup>3</sup>                                                                    |
| Absorption coefficient (μ)                | 0.772 mm <sup>-1</sup>                                                                     |
| F(000)                                    | 1760                                                                                       |
| Crystal color, habit                      | Colorless prism                                                                            |
| Crystal size                              | 0.236 × 0.262 × 0.578 mm                                                                   |
| θ range for data collection               | 1.718 to 27.499                                                                            |
| Index ranges                              | -20 ≤ h ≤ 20,<br>-20 ≤ k ≤ 20,<br>-22 ≤ l ≤ 23                                             |
| Reflections collected                     | 64360                                                                                      |
| Independent reflections                   | 5113 [R <sub>int</sub> = 0.0954]                                                           |
| Completeness to<br>θ = 25.242°            | 100%                                                                                       |
| Absorption correction                     | Semi-empirical from<br>equivalents                                                         |
| Max. and min. transmission                | 0.6632 and 0.7868                                                                          |
| Refinement method                         | Full-matrix least-squares on<br>F <sup>2</sup>                                             |
| Data / restraints / parameters            | 5113 / 0 / 322                                                                             |
| Goodness-of-fit on F <sup>2</sup>         | 1.076                                                                                      |
| Final R indices [I ≥ 4σ(F <sub>0</sub> )] | R <sub>1</sub> = 0.0445<br>wR <sub>2</sub> = 0.0970                                        |
| R indices (all data)                      | R <sub>1</sub> = 0.0513<br>wR <sub>2</sub> = 0.1018                                        |
| Extinction coefficient                    | n/a                                                                                        |
| Largest diff. peak / hole                 | 0.392 / -0.367                                                                             |



### Computational Details

Density functional theory (DFT) calculations were performed using the Gaussian 16 program.<sup>11</sup>

The electronic absorption spectra of  $[1^H]^-$  and  $[2^H]^-$  were calculated by TD-DFT (20 states) based on optimized geometries calculated using the B3LYP functional with the 6-311 +G(2d,p) basis set using PCM solvation with acetonitrile.

**Table S3.** Optimized coordinates for  $[1^H]^-$  with  $CH_3CN$  solvation (Å).

| Number | Atom | x       | y       | z       |
|--------|------|---------|---------|---------|
| 1      | S    | 2.3489  | 0.0000  | 0.0000  |
| 2      | C    | 0.5759  | 0.0000  | 0.0000  |
| 3      | C    | -0.1645 | -1.1992 | 0.0000  |
| 4      | H    | 0.3680  | -2.1436 | 0.0001  |
| 5      | C    | -1.5556 | -1.1986 | 0.0000  |
| 6      | H    | -2.0873 | -2.1445 | 0.0001  |
| 7      | C    | -2.2677 | 0.0000  | 0.0000  |
| 8      | H    | -3.3512 | 0.0000  | -0.0003 |
| 9      | C    | -1.5555 | 1.1987  | 0.0000  |
| 10     | H    | -2.0873 | 2.1445  | 0.0000  |
| 11     | C    | -0.1645 | 1.1992  | 0.0000  |
| 12     | H    | 0.3681  | 2.1435  | 0.0001  |

**Table S4.** Optimized coordinates for  $[2^H]^-$  with  $CH_3CN$  solvation (Å).

| Number | Atom | x        | y        | z        |
|--------|------|----------|----------|----------|
| 1      | S    | -2.75086 | 0.645699 | 0.000188 |
| 2      | S    | -1.42445 | -0.96207 | -0.00022 |
| 3      | C    | 0.229056 | -0.33388 | -3.8E-05 |
| 4      | C    | 0.533871 | 1.033857 | -0.00016 |
| 5      | H    | -0.29019 | 1.735495 | -0.0002  |
| 6      | C    | 1.857661 | 1.459705 | -9.3E-05 |
| 7      | H    | 2.069632 | 2.522943 | -4.9E-05 |
| 8      | C    | 2.909596 | 0.545639 | 0.000049 |
| 9      | H    | 3.937702 | 0.884223 | -9.6E-05 |
| 10     | C    | 2.609914 | -0.82007 | 0.000107 |
| 11     | H    | 3.411065 | -1.55023 | 0.000352 |
| 12     | C    | 1.293413 | -1.25436 | 0.000145 |
| 13     | H    | 1.075616 | -2.31579 | 0.00043  |

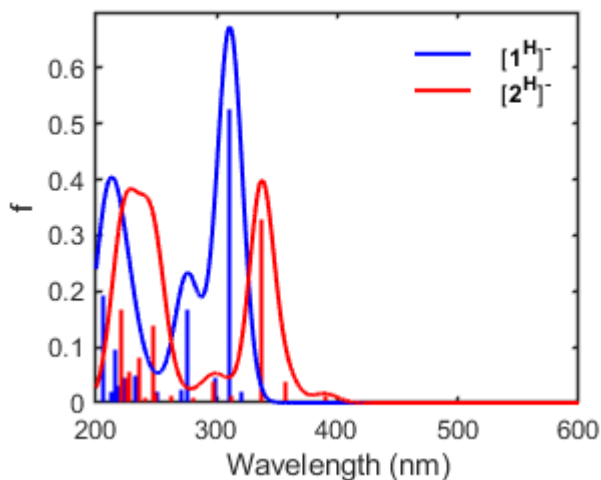

**Figure S89.** Simulated electronic absorption spectra for  $[1^H]^-$  (blue) and  $[2^H]^-$  (red).

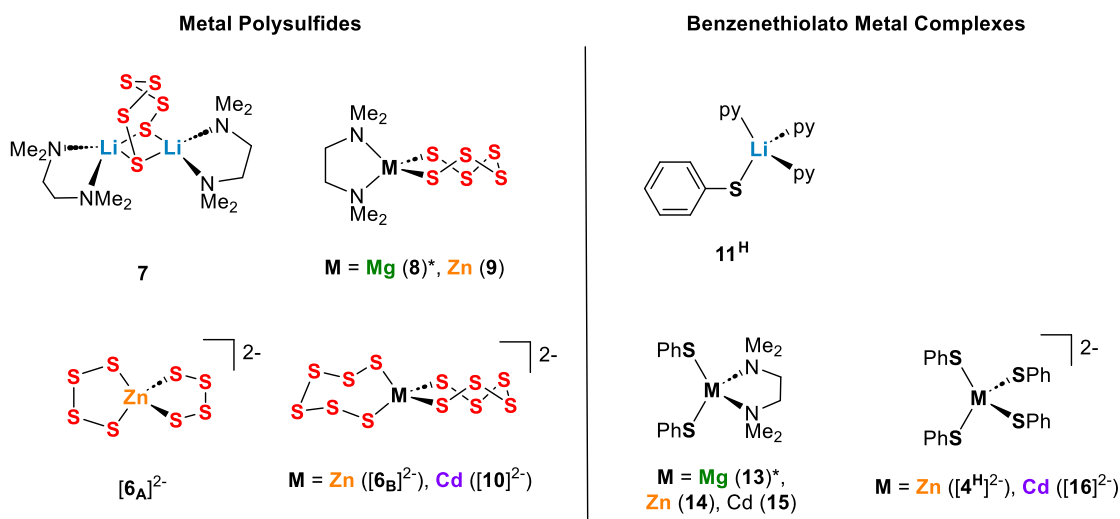

**Figure S90.** Drawings of complexes optimized using DFT.

Optimized geometries of metal complexes shown in Fig. S73 were calculated using the B3LYP functional basis sets as described as in Table S5. The interaction energies between polysulfide or benzenethiolate anions and metal fragments were calculated using the counterpoise (BSSE) correction.<sup>12-13</sup> Ionic energetic contributions ( $E_{\text{ionic}}$ ) were calculated using Natural Population Analysis (NPA) and subtracted from the interaction energy to yield the covalent energetic contributions ( $E_{\text{cov}}$ ).

**Table S5.** Complexes and fragments calculated, with basis sets, interaction energies, BSSE correction,  $E_{\text{ionic}}$ , and  $E_{\text{cov}}$ . All energies reported in kcal/mol unless otherwise indicated.

| Compound                               | $M^{n+}$         | Fragment                     | Basis Set                                    | BSSE (a.u.)    | $E_{\text{interactions}}$ | $E_{\text{ionic}}$ | $E_{\text{cov}}$ |
|----------------------------------------|------------------|------------------------------|----------------------------------------------|----------------|---------------------------|--------------------|------------------|
| <b>11<sup>H*</sup></b>                 | Li <sup>+</sup>  | PhS <sup>-</sup>             | 6-311<br>+G(3df)                             | 0.001776772700 | -90.7051                  | -82.83             | -7.875110931     |
| <b>13*</b>                             | Mg <sup>2+</sup> | PhS <sup>-</sup>             | 6-311<br>+G(3df)                             | 0.003993009237 | -135.24                   | -118.4093          | -16.83054106     |
| <b>14</b>                              | Zn <sup>2+</sup> | PhS <sup>-</sup>             | 6-311<br>+G(3df)                             | 0.002109729748 | -139.384                  | -42.921            | -96.46273478     |
| [ <b>4<sup>H</sup></b> ] <sup>2-</sup> | Zn <sup>2+</sup> | PhS <sup>-</sup>             | 6-31<br>+G(d,p)                              | 0.002144696819 | 16.33029                  | 34.44975           | -18.11946123     |
| [ <b>16</b> ] <sup>2-</sup>            | Cd <sup>2+</sup> | PhS <sup>-</sup>             | C,H,S:<br>6-311<br>+G(3df)<br>Cd:<br>LANL2DZ | 0.001921188647 | 18.42759                  | 20.9585            | -2.530905878     |
| <b>7</b>                               | Li <sup>+</sup>  | S <sub>6</sub> <sup>2-</sup> | 6-31 G(d,p)                                  | 0.018445172823 | -375.859                  | -295.5525          | -80.30639144     |
| <b>8*</b>                              | Mg <sup>2+</sup> | S <sub>6</sub> <sup>2-</sup> | 6-311<br>+G(3df)                             | 0.003993009237 | -437.726                  | -329.563           | -108.1634803     |
| <b>9</b>                               | Zn <sup>2+</sup> | S <sub>6</sub> <sup>2-</sup> | 6-311<br>+G(3df)                             | 0.003153131171 | -446.629                  | -134.4733          | -312.1553545     |
| [ <b>6<sub>A</sub></b> ] <sup>2-</sup> | Zn <sup>2+</sup> | S <sub>4</sub> <sup>2-</sup> | 6-311<br>+G(3df)                             | 0.002828392891 | -116.788                  | 17.50725           | -134.2947962     |
| [ <b>6<sub>B</sub></b> ] <sup>2-</sup> | Zn <sup>2+</sup> | S <sub>6</sub> <sup>2-</sup> | 6-311<br>+G(3df)                             | 0.003384120439 | -99.5436                  | 17.57              | -117.1136066     |
| [ <b>10</b> ] <sup>2-</sup>            | Cd <sup>2+</sup> | S <sub>6</sub> <sup>2-</sup> | S:<br>6-311<br>+G(3df)<br>Cd:<br>LANL2DZ     | 0.002890740856 | -102.65                   | -21.39775          | -81.25232148     |

(\* ) indicates compounds that have not been structurally characterized.

**Table S6.** Optimized coordinates (Å) and NPA charges for complex **11<sup>H</sup>**.

| Number | Atom | q <sub>NPA</sub> | x        | y        | z        |
|--------|------|------------------|----------|----------|----------|
| 1      | Li   | 0.81085          | -0.60973 | -0.00245 | -0.05076 |
| 2      | N    | -0.53192         | -0.263   | -1.49099 | 1.401699 |
| 3      | C    | 0.06183          | -1.05513 | -1.8358  | 2.420973 |
| 4      | C    | -0.24384         | -0.75875 | -2.86505 | 3.301883 |
| 5      | C    | -0.15468         | 0.421096 | -3.57476 | 3.116155 |
| 6      | C    | -0.23139         | 1.249015 | -3.22692 | 2.059224 |
| 7      | C    | 0.07499          | 0.869864 | -2.1819  | 1.225637 |
| 8      | N    | -0.5298          | -2.45746 | -0.43518 | -0.97787 |
| 9      | C    | 0.06321          | -3.65855 | 0.023255 | -0.61466 |
| 10     | C    | -0.24219         | -4.82976 | -0.29579 | -1.28619 |
| 11     | C    | -0.15557         | -4.75135 | -1.1302  | -2.3937  |
| 12     | C    | -0.23292         | -3.50757 | -1.60568 | -2.78312 |
| 13     | C    | 0.07425          | -2.38836 | -1.23389 | -2.04941 |

|    |   |          |          |          |          |
|----|---|----------|----------|----------|----------|
| 14 | N | -0.53448 | -0.73652 | 1.939489 | 0.780478 |
| 15 | C | 0.07073  | -0.27156 | 2.884006 | -0.04697 |
| 16 | C | -0.23199 | -0.2598  | 4.23274  | 0.285175 |
| 17 | C | -0.15436 | -0.74399 | 4.621512 | 1.525732 |
| 18 | C | -0.24257 | -1.22209 | 3.646044 | 2.39148  |
| 19 | C | 0.06082  | -1.19717 | 2.323292 | 1.974624 |
| 27 | H | 0.18018  | -1.97291 | -1.26601 | 2.533153 |
| 28 | H | 0.21318  | -1.43903 | -3.10306 | 4.110482 |
| 29 | H | 0.21038  | 0.687757 | -4.38584 | 3.78434  |
| 30 | H | 0.21947  | 2.17833  | -3.75115 | 1.874398 |
| 31 | H | 0.22893  | 1.480477 | -1.88132 | 0.381526 |
| 32 | H | 0.18464  | -3.68136 | 0.680361 | 0.249349 |
| 33 | H | 0.2135   | -5.7775  | 0.105414 | -0.94841 |
| 34 | H | 0.21043  | -5.64463 | -1.40051 | -2.94539 |
| 35 | H | 0.21746  | -3.39631 | -2.25186 | -3.64505 |
| 36 | H | 0.22299  | -1.39431 | -1.56978 | -2.32718 |
| 37 | H | 0.22998  | 0.11466  | 2.523997 | -0.99628 |
| 38 | H | 0.21842  | 0.130084 | 4.95699  | -0.41931 |
| 39 | H | 0.21078  | -0.74496 | 5.6658   | 1.817044 |
| 40 | H | 0.21384  | -1.60344 | 3.900678 | 3.372788 |
| 41 | H | 0.18218  | -1.55589 | 1.534866 | 2.629542 |
| 20 | S | -0.55918 | 0.927182 | -0.09617 | -1.88197 |
| 21 | C | -0.16622 | 2.618865 | 0.000237 | -1.40568 |
| 22 | C | -0.25292 | 3.037893 | 0.535865 | -0.17402 |
| 23 | C | -0.20531 | 4.382353 | 0.602078 | 0.173073 |
| 24 | C | -0.25204 | 5.363198 | 0.13754  | -0.69639 |
| 25 | C | -0.20229 | 4.97045  | -0.39418 | -1.92279 |
| 26 | C | -0.23035 | 3.629115 | -0.46179 | -2.27008 |
| 42 | H | 0.19238  | 2.292079 | 0.912938 | 0.517637 |
| 43 | H | 0.19363  | 4.664048 | 1.02474  | 1.13291  |
| 44 | H | 0.19597  | 6.411951 | 0.19059  | -0.42672 |
| 45 | H | 0.1957   | 5.719187 | -0.76057 | -2.61845 |
| 46 | H | 0.20331  | 3.338285 | -0.87716 | -3.22842 |

**Table S7.** Optimized coordinates (Å) and NPA charges for complex **13**.

| Number | Atom | q <sub>NPA</sub> | x        | y        | z        |
|--------|------|------------------|----------|----------|----------|
| 2      | S    | -0.6057          | 1.514999 | -0.17011 | 1.504245 |
| 3      | N    | -0.67221         | -0.91041 | 2.392888 | 1.134118 |
| 4      | N    | -0.67226         | 1.031154 | 2.320227 | -1.15218 |
| 5      | C    | -0.35317         | -2.36862 | 2.220898 | 1.26556  |
| 6      | H    | 0.21665          | -2.80392 | 2.022836 | 0.287051 |
| 7      | H    | 0.17562          | -2.83183 | 3.115104 | 1.705144 |
| 8      | H    | 0.20823          | -2.57471 | 1.366527 | 1.910175 |
| 9      | C    | -0.35384         | -0.31262 | 2.546574 | 2.472115 |
| 10     | H    | 0.20581          | 0.767975 | 2.656044 | 2.401565 |
| 11     | H    | 0.21058          | -0.51657 | 1.654702 | 3.063471 |
| 12     | H    | 0.17718          | -0.73254 | 3.421692 | 2.987615 |
| 13     | C    | -0.18594         | -0.60478 | 3.554055 | 0.272321 |
| 14     | H    | 0.20804          | -1.33181 | 3.561173 | -0.54155 |
| 15     | H    | 0.19547          | -0.73876 | 4.492045 | 0.830481 |
| 16     | C    | -0.1859          | 0.810524 | 3.502171 | -0.29287 |
| 17     | H    | 0.1955           | 1.011962 | 4.426933 | -0.85298 |
| 18     | H    | 0.20804          | 1.536203 | 3.457549 | 0.521003 |
| 19     | C    | -0.35329         | 2.47386  | 2.049675 | -1.29112 |
| 20     | H    | 0.20893          | 2.618164 | 1.179743 | -1.93164 |
| 21     | H    | 0.21643          | 2.900696 | 1.828952 | -0.31378 |
| 22     | H    | 0.17558          | 2.993172 | 2.908359 | -1.73885 |
| 23     | C    | -0.35389         | 0.437159 | 2.508191 | -2.48731 |
| 24     | H    | 0.21087          | 0.579346 | 1.602749 | -3.07615 |
| 25     | H    | 0.17728          | 0.910209 | 3.352252 | -3.00848 |
| 26     | H    | 0.20551          | -0.63366 | 2.688326 | -2.4116  |
| 37     | C    | -0.16807         | 2.485967 | -1.38002 | 0.632197 |
| 38     | C    | -0.24629         | 2.045826 | -2.05758 | -0.51001 |
| 39     | H    | 0.21192          | 1.062925 | -1.85249 | -0.91857 |
| 40     | C    | -0.19398         | 2.854177 | -3.00542 | -1.12691 |
| 41     | H    | 0.20385          | 2.488842 | -3.51739 | -2.0108  |
| 42     | C    | -0.23052         | 4.112053 | -3.30555 | -0.6171  |
| 43     | C    | -0.19661         | 4.554231 | -2.64283 | 0.523068 |
| 44     | H    | 0.20124          | 5.531655 | -2.86603 | 0.937557 |
| 45     | C    | -0.23026         | 3.753823 | -1.69056 | 1.139816 |
| 46     | H    | 0.20784          | 4.108375 | -1.17737 | 2.026544 |
| 48     | H    | 0.20196          | 4.737829 | -4.04772 | -1.09918 |
| 49     | Mg   | 1.62359          | 0.009798 | 0.671525 | 0.000492 |
| 1      | S    | -0.6061          | -1.53802 | -0.11476 | -1.49147 |
| 27     | C    | -0.16753         | -2.55562 | -1.28509 | -0.62021 |
| 28     | C    | -0.2456          | -2.16437 | -1.94401 | 0.550406 |

|    |   |          |          |          |          |
|----|---|----------|----------|----------|----------|
| 29 | H | 0.21134  | -1.18895 | -1.75156 | 0.982607 |
| 30 | C | -0.194   | -3.01072 | -2.85953 | 1.165287 |
| 31 | H | 0.20365  | -2.68198 | -3.3576  | 2.071224 |
| 32 | C | -0.2305  | -4.25986 | -3.14483 | 0.626607 |
| 33 | C | -0.19665 | -4.6541  | -2.50011 | -0.54124 |
| 34 | H | 0.20115  | -5.62407 | -2.71177 | -0.97869 |
| 35 | C | -0.22954 | -3.81537 | -1.58088 | -1.1568  |
| 36 | H | 0.20773  | -4.13317 | -1.08204 | -2.06538 |
| 47 | H | 0.20186  | -4.91553 | -3.86151 | 1.107477 |

**Table S8.** Optimized coordinates (Å) and NPA charges for complex **14**.

| Number | Atom | q <sub>NPA</sub> | x        | y        | z        |
|--------|------|------------------|----------|----------|----------|
| 1      | Zn   | 0.93478          | -0.0098  | 0.671525 | -0.00049 |
| 3      | S    | -0.3869          | -1.515   | -0.17011 | -1.50425 |
| 4      | N    | -0.62458         | 0.910405 | 2.392888 | -1.13412 |
| 5      | N    | -0.62453         | -1.03115 | 2.320227 | 1.15218  |
| 6      | C    | -0.33917         | 2.368621 | 2.220898 | -1.26556 |
| 7      | H    | 0.21723          | 2.803923 | 2.022836 | -0.28705 |
| 8      | H    | 0.1766           | 2.831828 | 3.115104 | -1.70514 |
| 9      | H    | 0.20683          | 2.574708 | 1.366527 | -1.91018 |
| 10     | C    | -0.34079         | 0.312617 | 2.546574 | -2.47212 |
| 11     | H    | 0.20484          | -0.76798 | 2.656044 | -2.40157 |
| 12     | H    | 0.21229          | 0.51657  | 1.654702 | -3.06347 |
| 13     | H    | 0.17816          | 0.732543 | 3.421692 | -2.98762 |
| 14     | C    | -0.17417         | 0.60478  | 3.554055 | -0.27232 |
| 15     | H    | 0.20883          | 1.331809 | 3.561173 | 0.541545 |
| 16     | H    | 0.19606          | 0.738758 | 4.492045 | -0.83048 |
| 17     | C    | -0.17442         | -0.81052 | 3.502171 | 0.292871 |
| 18     | H    | 0.19588          | -1.01196 | 4.426933 | 0.852975 |
| 19     | H    | 0.20945          | -1.5362  | 3.457549 | -0.521   |
| 20     | C    | -0.33943         | -2.47386 | 2.049675 | 1.291116 |
| 21     | H    | 0.20702          | -2.61816 | 1.179743 | 1.931639 |
| 22     | H    | 0.21764          | -2.9007  | 1.828952 | 0.31378  |
| 23     | H    | 0.17657          | -2.99317 | 2.908359 | 1.738849 |
| 24     | C    | -0.34055         | -0.43716 | 2.508191 | 2.487309 |
| 25     | H    | 0.21254          | -0.57935 | 1.602749 | 3.076149 |
| 26     | H    | 0.17818          | -0.91021 | 3.352252 | 3.008479 |
| 27     | H    | 0.20408          | 0.633664 | 2.688326 | 2.411598 |
| 38     | C    | -0.1633          | -2.48597 | -1.38002 | -0.6322  |
| 39     | C    | -0.23252         | -2.04583 | -2.05758 | 0.510011 |
| 40     | H    | 0.21683          | -1.06293 | -1.85249 | 0.918566 |
| 41     | C    | -0.19096         | -2.85418 | -3.00542 | 1.126905 |

|    |   |          |          |          |          |
|----|---|----------|----------|----------|----------|
| 42 | H | 0.20351  | -2.48884 | -3.51739 | 2.010803 |
| 43 | C | -0.22758 | -4.11205 | -3.30555 | 0.617102 |
| 44 | C | -0.19463 | -4.55423 | -2.64283 | -0.52307 |
| 45 | H | 0.20158  | -5.53166 | -2.86603 | -0.93756 |
| 46 | C | -0.22431 | -3.75382 | -1.69056 | -1.13982 |
| 47 | H | 0.20626  | -4.10838 | -1.17737 | -2.02654 |
| 49 | H | 0.20194  | -4.73783 | -4.04772 | 1.099183 |
| 2  | S | -0.38523 | 1.538022 | -0.11476 | 1.491466 |
| 28 | C | -0.16308 | 2.555622 | -1.28509 | 0.620209 |
| 29 | C | -0.23318 | 2.164366 | -1.94401 | -0.55041 |
| 30 | H | 0.21625  | 1.188954 | -1.75156 | -0.98261 |
| 31 | C | -0.19091 | 3.010723 | -2.85953 | -1.16529 |
| 32 | H | 0.20335  | 2.681976 | -3.3576  | -2.07122 |
| 33 | C | -0.22785 | 4.259864 | -3.14483 | -0.62661 |
| 34 | C | -0.19448 | 4.654102 | -2.50011 | 0.54124  |
| 35 | H | 0.20156  | 5.624074 | -2.71177 | 0.978686 |
| 36 | C | -0.22386 | 3.815371 | -1.58088 | 1.156796 |
| 37 | H | 0.20625  | 4.133165 | -1.08204 | 2.065378 |
| 48 | H | 0.20192  | 4.91553  | -3.86151 | -1.10748 |

**Table S9.** Optimized coordinates (Å) and NPA charges for complex  $[4\text{H}]^{2-}$ .

| Number | Atom | $q_{\text{NPA}}$ | x        | y        | z        |
|--------|------|------------------|----------|----------|----------|
| 1      | Zn   | 0.6789           | -0.00133 | -0.0117  | -0.00196 |
| 3      | S    | -0.32344         | 1.245931 | -0.89904 | -1.87388 |
| 4      | S    | -0.32456         | 1.256301 | 0.872066 | 1.868235 |
| 5      | S    | -0.3231          | -1.24397 | 1.866629 | -0.88625 |
| 12     | C    | -0.15316         | 2.403809 | 0.289958 | -2.48598 |
| 13     | C    | -0.22121         | 2.69694  | 1.512156 | -1.83919 |
| 14     | C    | -0.2068          | 3.631934 | 2.402139 | -2.36926 |
| 15     | C    | -0.27646         | 4.313614 | 2.115793 | -3.55927 |
| 16     | C    | -0.22409         | 4.036533 | 0.907406 | -4.21165 |
| 17     | C    | -0.23737         | 3.101561 | 0.014428 | -3.68669 |
| 18     | C    | -0.15259         | 2.43498  | -0.30478 | 2.463971 |
| 19     | C    | -0.22235         | 2.78489  | -1.48897 | 1.775996 |
| 20     | C    | -0.20699         | 3.733997 | -2.37046 | 2.295254 |
| 21     | C    | -0.27651         | 4.376574 | -2.11091 | 3.512893 |
| 22     | C    | -0.22398         | 4.044424 | -0.93915 | 4.205188 |
| 23     | C    | -0.23732         | 3.093336 | -0.05615 | 3.69248  |
| 24     | C    | -0.15318         | -2.39338 | 2.493132 | 0.302886 |
| 25     | C    | -0.22095         | -2.66577 | 1.871084 | 1.542598 |
| 26     | C    | -0.20687         | -3.59446 | 2.412413 | 2.432456 |
| 27     | C    | -0.27676         | -4.29018 | 3.589922 | 2.128586 |

|    |   |          |          |          |          |
|----|---|----------|----------|----------|----------|
| 28 | C | -0.22402 | -4.0342  | 4.217557 | 0.902523 |
| 29 | C | -0.23731 | -3.10626 | 3.680787 | 0.009334 |
| 35 | H | 0.23131  | 2.191711 | 1.755014 | -0.90997 |
| 36 | H | 0.18859  | 3.828723 | 3.332831 | -1.8401  |
| 37 | H | 0.18001  | 5.040785 | 2.814961 | -3.96698 |
| 38 | H | 0.17936  | 4.550834 | 0.657763 | -5.13932 |
| 39 | H | 0.19415  | 2.892781 | -0.91844 | -4.2045  |
| 40 | H | 0.23172  | 2.311322 | -1.70865 | 0.824285 |
| 41 | H | 0.18842  | 3.973994 | -3.2725  | 1.735132 |
| 42 | H | 0.17997  | 5.115531 | -2.80292 | 3.911563 |
| 43 | H | 0.17938  | 4.526942 | -0.71145 | 5.155307 |
| 44 | H | 0.19431  | 2.840122 | 0.847009 | 4.242123 |
| 45 | H | 0.23064  | -2.14931 | 0.951882 | 1.799213 |
| 46 | H | 0.18856  | -3.77522 | 1.902225 | 3.376887 |
| 47 | H | 0.18002  | -5.01244 | 4.006533 | 2.827586 |
| 48 | H | 0.17938  | -4.56051 | 5.134495 | 0.638656 |
| 49 | H | 0.19419  | -2.91489 | 4.1788   | -0.93793 |
| 2  | S | -0.32238 | -1.26213 | -1.88277 | 0.888224 |
| 6  | C | -0.15259 | -2.4453  | -2.48336 | -0.28153 |
| 7  | C | -0.22219 | -2.78195 | -1.8144  | -1.4806  |
| 8  | C | -0.20717 | -3.73516 | -2.33755 | -2.35549 |
| 9  | C | -0.27704 | -4.39453 | -3.54173 | -2.07574 |
| 10 | C | -0.22408 | -4.07537 | -4.21575 | -0.88978 |
| 11 | C | -0.23737 | -3.1212  | -3.69852 | -0.01273 |
| 30 | H | 0.23101  | -2.29587 | -0.87317 | -1.71682 |
| 31 | H | 0.18834  | -3.96483 | -1.7915  | -3.26882 |
| 32 | H | 0.17996  | -5.13629 | -3.94376 | -2.76279 |
| 33 | H | 0.17934  | -4.57128 | -5.15488 | -0.64572 |
| 34 | H | 0.19428  | -2.8793  | -4.23377 | 0.902062 |

**Table S10.** Optimized coordinates (Å) and NPA charges for complex [16]<sup>2-</sup>.

| Number | Atom | q <sub>NPA</sub> | x        | y        | z        |
|--------|------|------------------|----------|----------|----------|
| 1      | Cd   | 1.03517          | -0.01563 | 0.090563 | -0.05405 |
| 3      | S    | -0.41464         | 1.354103 | -1.27322 | -1.8905  |
| 4      | S    | -0.40521         | 1.450724 | 1.336384 | 1.791503 |
| 5      | S    | -0.40217         | -1.28063 | 2.032746 | -1.35729 |
| 12     | C    | -0.1544          | 2.641319 | -0.2893  | -2.57194 |
| 13     | C    | -0.22638         | 3.201712 | 0.826306 | -1.92289 |
| 14     | C    | -0.20518         | 4.236615 | 1.549669 | -2.49961 |
| 15     | C    | -0.27325         | 4.761369 | 1.193112 | -3.74019 |
| 16     | C    | -0.22087         | 4.221657 | 0.088671 | -4.39592 |
| 17     | C    | -0.23679         | 3.183406 | -0.63467 | -3.82581 |



|    |   |          |          |          |          |
|----|---|----------|----------|----------|----------|
| 18 | C | -0.15792 | 2.395492 | 0.206296 | 2.748952 |
| 19 | C | -0.22481 | 2.162624 | -1.18082 | 2.790858 |
| 20 | C | -0.20533 | 2.935367 | -2.01893 | 3.583056 |
| 21 | C | -0.27424 | 3.96885  | -1.51538 | 4.369981 |
| 22 | C | -0.2208  | 4.213706 | -0.14385 | 4.343923 |
| 23 | C | -0.23623 | 3.44619  | 0.696894 | 3.550626 |
| 24 | C | -0.15597 | -2.51274 | 2.779614 | -0.35218 |
| 25 | C | -0.22695 | -3.08003 | 2.170418 | 0.782674 |
| 26 | C | -0.20586 | -4.06902 | 2.80373  | 1.522738 |
| 27 | C | -0.27507 | -4.54125 | 4.064846 | 1.164622 |
| 28 | C | -0.22128 | -3.99485 | 4.682474 | 0.041433 |
| 29 | C | -0.23705 | -3.00211 | 4.055474 | -0.69825 |
| 35 | H | 0.2269   | 2.824637 | 1.120591 | -0.94993 |
| 36 | H | 0.1895   | 4.638466 | 2.406446 | -1.96605 |
| 37 | H | 0.18033  | 5.570243 | 1.76368  | -4.18613 |
| 38 | H | 0.17975  | 4.609649 | -0.21103 | -5.36658 |
| 39 | H | 0.19444  | 2.767081 | -1.48858 | -4.35    |
| 40 | H | 0.22222  | 1.359234 | -1.60428 | 2.199652 |
| 41 | H | 0.18946  | 2.722079 | -3.08414 | 3.583318 |
| 42 | H | 0.1805   | 4.570587 | -2.176   | 4.986475 |
| 43 | H | 0.17988  | 5.015577 | 0.277134 | 4.945813 |
| 44 | H | 0.1944   | 3.651049 | 1.762318 | 3.535898 |
| 45 | H | 0.22527  | -2.74529 | 1.182942 | 1.079323 |
| 46 | H | 0.18904  | -4.47723 | 2.298265 | 2.393505 |
| 47 | H | 0.18008  | -5.31456 | 4.555223 | 1.747917 |
| 48 | H | 0.17948  | -4.34198 | 5.667876 | -0.26046 |
| 49 | H | 0.19444  | -2.58024 | 4.550768 | -1.56662 |
| 2  | S | -0.41191 | -1.56779 | -1.66175 | 1.250725 |
| 6  | C | -0.15719 | -2.52383 | -2.64845 | 0.156732 |
| 7  | C | -0.22391 | -2.31325 | -2.72048 | -1.23266 |
| 8  | C | -0.2049  | -3.0966  | -3.53303 | -2.04106 |
| 9  | C | -0.27353 | -4.12052 | -4.31022 | -1.50439 |
| 10 | C | -0.2205  | -4.34474 | -4.25342 | -0.13026 |
| 11 | C | -0.2356  | -3.56588 | -3.44051 | 0.680624 |
| 30 | H | 0.22131  | -1.52006 | -2.13599 | -1.68368 |
| 31 | H | 0.19003  | -2.89887 | -3.55679 | -3.10891 |
| 32 | H | 0.18083  | -4.73041 | -4.94303 | -2.14163 |
| 33 | H | 0.18022  | -5.13878 | -4.84703 | 0.316444 |
| 34 | H | 0.19467  | -3.75441 | -3.40276 | 1.748467 |

**Table S11.** Optimized coordinates (Å) and NPA charges for complex **7**.

| Number | Atom | q <sub>NPA</sub> | x        | y        | z        |
|--------|------|------------------|----------|----------|----------|
| 1      | Li   | 0.8267           | -1.5978  | 0.416871 | -0.06174 |
| 5      | N    | -0.5695          | -2.54217 | 2.399646 | 0.024098 |
| 6      | N    | -0.57825         | -3.60334 | -0.38849 | -0.04598 |
| 7      | C    | -0.48027         | -1.96785 | 3.312093 | 1.023249 |
| 8      | C    | -0.48474         | -2.48719 | 3.018341 | -1.30991 |
| 9      | C    | -0.27807         | -3.92723 | 2.048378 | 0.396897 |
| 10     | C    | -0.27664         | -4.4301  | 0.800174 | -0.32732 |
| 11     | C    | -0.48953         | -3.86926 | -0.9176  | 1.304165 |
| 12     | C    | -0.48369         | -3.86306 | -1.43779 | -1.04653 |
| 13     | H    | 0.22724          | -0.94572 | 3.570548 | 0.735065 |
| 14     | H    | 0.24834          | -1.93062 | 2.817541 | 1.996746 |
| 15     | H    | 0.20468          | -2.54444 | 4.248321 | 1.114157 |
| 16     | H    | 0.23926          | -2.86368 | 2.331145 | -2.06932 |
| 17     | H    | 0.24033          | -1.44904 | 3.240069 | -1.56594 |
| 18     | H    | 0.20269          | -3.07217 | 3.953132 | -1.35288 |
| 19     | H    | 0.22219          | -4.6185  | 2.885866 | 0.1961   |
| 20     | H    | 0.24273          | -3.94571 | 1.878955 | 1.477386 |
| 21     | H    | 0.22349          | -5.48544 | 0.627593 | -0.0514  |
| 22     | H    | 0.23895          | -4.4142  | 0.968482 | -1.40851 |
| 23     | H    | 0.2356           | -3.60105 | -0.1842  | 2.067075 |
| 24     | H    | 0.25276          | -3.25207 | -1.80199 | 1.467974 |
| 25     | H    | 0.20222          | -4.93028 | -1.19336 | 1.429065 |
| 26     | H    | 0.23885          | -3.61484 | -1.06738 | -2.04394 |
| 27     | H    | 0.20166          | -4.91727 | -1.76224 | -1.03659 |
| 28     | H    | 0.25256          | -3.22588 | -2.29853 | -0.83911 |
| 30     | Li   | 0.8267           | 1.597736 | 0.416863 | 0.061616 |
| 33     | N    | -0.5695          | 2.541961 | 2.399728 | -0.02428 |
| 34     | N    | -0.57825         | 3.603437 | -0.38823 | 0.045945 |
| 35     | C    | -0.48027         | 1.967479 | 3.311947 | -1.02354 |
| 36     | C    | -0.48473         | 2.486813 | 3.018549 | 1.309667 |
| 37     | C    | -0.27806         | 3.927086 | 2.048652 | -0.39697 |
| 38     | C    | -0.27664         | 4.430052 | 0.800528 | 0.327321 |
| 39     | C    | -0.48953         | 3.869415 | -0.91721 | -1.30424 |
| 40     | C    | -0.48369         | 3.863336 | -1.43754 | 1.046436 |
| 41     | H    | 0.22724          | 0.945282 | 3.570211 | -0.73544 |
| 42     | H    | 0.24833          | 1.930386 | 2.817291 | -1.99699 |
| 43     | H    | 0.20468          | 2.543861 | 4.248295 | -1.11452 |
| 44     | H    | 0.23925          | 2.863543 | 2.331551 | 2.06913  |
| 45     | H    | 0.24033          | 1.448605 | 3.239982 | 1.565705 |
| 46     | H    | 0.20269          | 3.071508 | 3.953524 | 1.35252  |

|    |   |          |          |          |          |
|----|---|----------|----------|----------|----------|
| 47 | H | 0.22219  | 4.61824  | 2.886226 | -0.19612 |
| 48 | H | 0.24273  | 3.945701 | 1.87921  | -1.47745 |
| 49 | H | 0.22349  | 5.485426 | 0.628048 | 0.051454 |
| 50 | H | 0.23895  | 4.414071 | 0.968858 | 1.408501 |
| 51 | H | 0.23559  | 3.601041 | -0.18381 | -2.06709 |
| 52 | H | 0.25276  | 3.252383 | -1.80171 | -1.46807 |
| 53 | H | 0.20222  | 4.930484 | -1.19277 | -1.42919 |
| 54 | H | 0.23885  | 3.615087 | -1.06723 | 2.043868 |
| 55 | H | 0.20166  | 4.917599 | -1.76183 | 1.036459 |
| 56 | H | 0.25256  | 3.226286 | -2.29837 | 0.838981 |
| 2  | S | -0.74943 | -0.06177 | 0.21297  | 1.927564 |
| 3  | S | -0.01619 | 0.220547 | -1.82317 | 2.345076 |
| 4  | S | -0.09394 | -0.6395  | -3.04516 | 0.872782 |
| 31 | S | -0.09395 | 0.639817 | -3.04519 | -0.87236 |
| 32 | S | -0.01619 | -0.22036 | -1.82355 | -2.34486 |
| 29 | S | -0.74944 | 0.061597 | 0.212711 | -1.92765 |

**Table S12.** Optimized coordinates (Å) and NPA charges for complex **8**.

| Number | Atom | q <sub>NPA</sub> | x        | y        | z        |
|--------|------|------------------|----------|----------|----------|
| 4      | N    | -0.67218         | 2.351538 | -0.47041 | 1.417839 |
| 5      | C    | -0.18545         | 3.535383 | -0.54784 | 0.53121  |
| 6      | C    | -0.35554         | 2.514677 | 0.593203 | 2.429251 |
| 7      | C    | -0.35265         | 2.138798 | -1.76129 | 2.103384 |
| 8      | H    | 0.19706          | 4.461906 | -0.48465 | 1.119087 |
| 9      | H    | 0.17987          | 3.371038 | 0.379447 | 3.082951 |
| 10     | H    | 0.17731          | 3.012086 | -2.03324 | 2.711339 |
| 11     | H    | 0.21431          | 1.944475 | -2.54231 | 1.369191 |
| 12     | H    | 0.20579          | 3.528814 | -1.5303  | 0.055363 |
| 13     | H    | 0.21649          | 1.611064 | 0.66028  | 3.033753 |
| 14     | H    | 0.2069           | 1.269254 | -1.68318 | 2.756601 |
| 15     | H    | 0.19928          | 2.666508 | 1.560682 | 1.952288 |
| 17     | N    | -0.67218         | 2.351542 | 0.470408 | -1.41784 |
| 19     | C    | -0.18545         | 3.535385 | 0.547835 | -0.5312  |
| 21     | C    | -0.35554         | 2.514683 | -0.5932  | -2.42925 |
| 22     | C    | -0.35265         | 2.138807 | 1.761294 | -2.10338 |
| 23     | H    | 0.19706          | 4.46191  | 0.484651 | -1.11908 |
| 24     | H    | 0.20579          | 3.528816 | 1.530297 | -0.05536 |
| 25     | H    | 0.17987          | 3.371046 | -0.37945 | -3.08295 |
| 26     | H    | 0.21649          | 1.611072 | -0.66028 | -3.03375 |
| 27     | H    | 0.19928          | 2.666512 | -1.56068 | -1.95228 |
| 28     | H    | 0.17731          | 3.012097 | 2.033233 | -2.71133 |
| 29     | H    | 0.21431          | 1.944482 | 2.542311 | -1.36919 |

|    |    |          |          |          |          |
|----|----|----------|----------|----------|----------|
| 30 | H  | 0.2069   | 1.269264 | 1.683183 | -2.7566  |
| 31 | Mg | 1.61035  | 0.676053 | 0.000001 | -1E-06   |
| 1  | S  | -0.76498 | -0.2712  | -2.00615 | -0.89933 |
| 2  | S  | -0.03996 | -2.01534 | -2.17545 | 0.247104 |
| 3  | S  | -0.03143 | -3.43317 | -0.89691 | -0.54154 |
| 16 | S  | -0.76498 | -0.27121 | 2.006157 | 0.899327 |
| 18 | S  | -0.03143 | -3.43317 | 0.896906 | 0.541542 |
| 20 | S  | -0.03996 | -2.01534 | 2.175453 | -0.24711 |

**Table S13.** Optimized coordinates (Å) and NPA charges for complex **9**.

| Number | Atom | q <sub>NPA</sub> | x        | y        | z        |
|--------|------|------------------|----------|----------|----------|
| 1      | Zn   | 0.88444          | 0.608746 | 0.000007 | -8E-06   |
| 5      | N    | -0.62535         | 2.306555 | -0.49554 | 1.404913 |
| 6      | C    | -0.17512         | 3.488459 | -0.55686 | 0.521127 |
| 7      | C    | -0.34229         | 2.461269 | 0.546191 | 2.436303 |
| 8      | C    | -0.33835         | 2.076353 | -1.79751 | 2.05689  |
| 9      | H    | 0.1974           | 4.414913 | -0.5026  | 1.110743 |
| 10     | H    | 0.18021          | 3.308243 | 0.316412 | 3.0975   |
| 11     | H    | 0.17797          | 2.940786 | -2.08996 | 2.668674 |
| 12     | H    | 0.21366          | 1.885522 | -2.55978 | 1.3028   |
| 13     | H    | 0.20655          | 3.483413 | -1.53048 | 0.027724 |
| 14     | H    | 0.21663          | 1.550171 | 0.605405 | 3.030033 |
| 15     | H    | 0.20827          | 1.198952 | -1.72751 | 2.699919 |
| 16     | H    | 0.19907          | 2.624246 | 1.521056 | 1.978932 |
| 18     | N    | -0.62535         | 2.306576 | 0.495534 | -1.4049  |
| 20     | C    | -0.17512         | 3.488475 | 0.556828 | -0.5211  |
| 22     | C    | -0.34229         | 2.461282 | -0.54619 | -2.4363  |
| 23     | C    | -0.33835         | 2.076409 | 1.797515 | -2.05687 |
| 24     | H    | 0.1974           | 4.414931 | 0.502549 | -1.11072 |
| 25     | H    | 0.20655          | 3.483447 | 1.530448 | -0.0277  |
| 26     | H    | 0.18021          | 3.30826  | -0.31642 | -3.09749 |
| 27     | H    | 0.21663          | 1.550186 | -0.60539 | -3.03003 |
| 28     | H    | 0.19908          | 2.624248 | -1.52106 | -1.97893 |
| 29     | H    | 0.17797          | 2.940862 | 2.08996  | -2.66863 |
| 30     | H    | 0.21366          | 1.88557  | 2.559783 | -1.30278 |
| 31     | H    | 0.20827          | 1.199025 | 1.727539 | -2.69992 |
| 2      | S    | -0.54535         | -0.32241 | -1.90038 | -0.89105 |
| 3      | S    | 0.00328          | -2.09596 | -2.16807 | 0.174613 |
| 4      | S    | -0.0188          | -3.50914 | -0.87048 | -0.58375 |
| 17     | S    | -0.54535         | -0.32242 | 1.900384 | 0.891047 |
| 19     | S    | -0.0188          | -3.50914 | 0.870478 | 0.583748 |
| 21     | S    | 0.00328          | -2.09596 | 2.168071 | -0.17462 |

**Table S14.** Optimized coordinates (Å) and NPA charges for complex **[6A]**<sup>2-</sup>.

| Number | Atom | q <sub>NPA</sub> | x        | y        | z        |
|--------|------|------------------|----------|----------|----------|
| 1      | Zn   | 0.67561          | 0.001305 | 0.000407 | -0.00016 |
| 6      | S    | -0.54259         | 1.54811  | -1.4875  | -1.14673 |
| 7      | S    | -0.12602         | 3.283704 | -0.3359  | -0.98749 |
| 8      | S    | -0.12605         | 3.283715 | 0.33536  | 0.987478 |
| 9      | S    | -0.54265         | 1.548533 | 1.487884 | 1.146523 |
| 2      | S    | -0.5429          | -1.54859 | -1.50773 | 1.122423 |
| 3      | S    | -0.12622         | -3.28393 | -0.3513  | 0.982948 |
| 4      | S    | -0.12624         | -3.28435 | 0.350526 | -0.98241 |
| 5      | S    | -0.54294         | -1.54964 | 1.507891 | -1.12245 |

**Table S15.** Optimized coordinates (Å) and NPA charges for complex **[6B]**<sup>2-</sup>.

| Number | Atom | q <sub>NPA</sub> | x        | y        | z        |
|--------|------|------------------|----------|----------|----------|
| 1      | Zn   | 0.67882          | 0.001873 | -0.00069 | 0.000139 |
| 8      | S    | -0.48523         | 1.290838 | 1.253487 | -1.62906 |
| 9      | S    | -0.48519         | 1.29174  | -1.25423 | 1.628956 |
| 10     | S    | -0.06218         | 3.016796 | 1.999517 | -0.78751 |
| 11     | S    | -0.06219         | 3.017939 | -1.99912 | 0.787186 |
| 12     | S    | -0.1221          | 4.523877 | 0.566644 | -0.8923  |
| 13     | S    | -0.12214         | 4.524321 | -0.56539 | 0.891773 |
| 2      | S    | -0.48533         | -1.29193 | 1.246672 | 1.633875 |
| 3      | S    | -0.06214         | -3.01604 | 1.995796 | 0.791732 |
| 4      | S    | -0.12242         | -4.5257  | 0.565346 | 0.893063 |
| 5      | S    | -0.12245         | -4.52588 | -0.5641  | -0.89317 |
| 6      | S    | -0.06216         | -3.01708 | -1.99554 | -0.79148 |
| 7      | S    | -0.48528         | -1.29239 | -1.24779 | -1.63334 |

**Table S16.** Optimized coordinates (Å) and NPA charges for complex **[10]**<sup>2-</sup>.

| Number | Atom | q <sub>NPA</sub> | x        | y        | z        |
|--------|------|------------------|----------|----------|----------|
| 1      | Cd   | 1.01047          | -0.00219 | 0.000061 | -9.5E-05 |
| 8      | S    | -0.56994         | -1.4961  | -2.12881 | -0.64559 |
| 9      | S    | -0.06486         | -3.23786 | -1.55061 | -1.57959 |
| 10     | S    | -0.11766         | -4.67544 | -1.04517 | -0.16344 |
| 11     | S    | -0.11764         | -4.67554 | 1.044758 | 0.163314 |
| 12     | S    | -0.06485         | -3.238   | 1.550115 | 1.57944  |
| 13     | S    | -0.56991         | -1.49644 | 2.128918 | 0.645512 |
| 2      | S    | -0.57005         | 1.497074 | 0.647169 | -2.12685 |
| 3      | S    | -0.06475         | 3.238713 | 1.580483 | -1.5477  |
| 4      | S    | -0.11802         | 4.677661 | 0.164901 | -1.045   |
| 5      | S    | -0.11801         | 4.677855 | -0.1665  | 1.044721 |
| 6      | S    | -0.06476         | 3.237597 | -1.58043 | 1.548142 |
| 7      | S    | -0.57002         | 1.49705  | -0.64501 | 2.12732  |

## References

- 1 A. B. Pangborn, M. A. Giardello, R. H. Grubbs, R. K. Rosen, F. J. Timmers, *Organometallics*, 1996, **15**, 1518-1520.
- 2 R. García-Rodríguez, H. Liu, *J. Phys. Chem. A*, 2014, **118**, 7314-7319.
- 3 A. Jerschow, N. Müller, *J. Magn. Reson.*, 1997, **125**, 372-375.
- 4 D. H. Wu, A. D. Chen, C. S. Johnson, *J. Magn. Reson. Ser. A* 1995, **115**, 260-264.
- 5 R. Evans, G. Dal Poggetto, M. Nilsson, G. A. Morris, *Anal. Chem.*, 2018, **90**, 3987-3994.
- 6 P.-J. Voorter, A. McKay, J. Dai, O. Paravagna, N. R. Cameron, T. Junkers, *Angew. Chem. Int. Ed.*, 2022, **61**, e202114536.
- 7 *APEX-3*, Bruker AXS: Madison, Wisconsin, 2016.
- 8 L. Krause, R. Herbst-Irmer, G. M. Sheldrick, D. Stalke, *J. Appl. Crystallogr.*, 2015, **48**, 3-10.
- 9 G. Sheldrick, *Acta Crystallogr. A*, 2015, **71**, 3-8.
- 10 G. Sheldrick, *Acta Crystallogr. C*, 2015, **71**, 3-8.
- 11 M. J. Frisch, G. W. Trucks, H. B. Schlegel, G. E. Scuseria, M. A. Robb, J. R. Cheeseman, G. Scalmani, V. Barone, G. A. Petersson, H. Nakatsuji, X. Li, M. Caricato, A. V. Marenich, J. Bloino, B. G. Janesko, R. Gomperts, B. Mennucci, H. P. Hratchian, J. V. Ortiz, A. F. Izmaylov, J. L. Sonnenberg, Williams, F. Ding, F. Lipparini, F. Egidi, J. Goings, B. Peng, A. Petrone, T. Henderson, D. Ranasinghe, V. G. Zakrzewski, J. Gao, N. Rega, G. Zheng, W. Liang, M. Hada, M. Ehara, K. Toyota, R. Fukuda, J. Hasegawa, M. Ishida, T. Nakajima, Y. Honda, O. Kitao, H. Nakai, T. Vreven, K. Throssell, J. A. Montgomery Jr., J. E. Peralta, F. Ogliaro, M. J. Bearpark, J. J. Heyd, E. N. Brothers, K. N. Kudin, V. N. Staroverov, T. A. Keith, R. Kobayashi, J. Normand, K. Raghavachari, A. P. Rendell, J. C. Burant, S. S. Iyengar, J. Tomasi, M. Cossi, J. M. Millam, M. Klene, C. Adamo, R. Cammi, J. W. Ochterski, R. L. Martin, K. Morokuma, O. Farkas, J. B. Foresman, D. J. Fox *Gaussian 16 Rev. C.01*, Wallingford, CT, 2016.
- 12 S. I. Gorelsky, L. Basumallick, J. Vura-Weis, R. Sarangi, K. O. Hodgson, B. Hedman, K. Fujisawa, E. I. Solomon, *Inorg. Chem.*, 2005, **44**, 4947-4960.
- 13 E. I. Solomon, S. I. Gorelsky, A. Dey, *J. Comput. Chem.*, 2006, **27**, 1415-1428.
